# Supplementary material for: Glia-mediated gut–brain cytokine signaling couples sleep to intestinal inflammatory responses induced by oxidative stress
Source: eLife. 2025 Sep 9;13:RP99999. doi: 10.7554/eLife.99999 (PMC12419797; doi:10.7554/eLife.99999)
Supplement: Source data 1. [file elife-99999-data1.xlsx]

## Sheet: Figure 1
	Figure 1
	a: Relative expression			b: Relative expression									c: Immunostaining
	voilaTS>			EEC>			EEC>			EEC>
	w1118	upd3-i TRiP		w1118	upd2-i SH		w1118	upd3-i KK		w1118	upd3-i TRiP
	0.654038	0.475594		1.2479	0.677797		1.2479	0.677797		0.78	0.16
	1.19157	0.247201		1.18028	0.0830108		1.3035	0.748829		0.7	0.1
	0.626236	0.463043		0.715893	0.72198		1.499	0.48314		1.62	0.46
	1.51161	0.286661		0.85593	0.366428		1.0754	0.447412		0.6	0.63
	0.557365	0.673527			0.275935		0.572464	0.210715		1.32	0.38
	1.46021	0.20343					1.18626	0.278282		0.94
	0.998967	0.347286
	d: Sleep pattern
	Minutes/30 minutes
	Bin (hours)	EEC>																													EEC>upd3iGD
	0.25	5	0	5	0	11	0	22	0	5	29	5	14	5	0	24	0	0	15	30	22	0	21	0	0	0	17	24	0	0	5	21	26	0	24	0	0	16	29	20	30	9	15	24	0	7	23	25	14
	0.75	0	0	0	0	17	0	26	0	0	21	0	0	0	1	18	0	0	0	30	16	0	0	0	0	0	30	22	0	0	0	9	26	0	29	0	0	0	15	26	30	2	30	30	0	0	28	30	21
	1.25	0	0	0	0	19	0	30	0	0	19	13	0	0	5	0	0	0	0	30	15	0	0	0	0	0	30	5	0	0	0	9	10	0	20	0	0	0	17	25	24	0	27	25	0	0	25	25	0
	1.75	0	0	6	0	5	0	26	0	0	19	8	7	0	0	9	0	0	0	30	4	0	0	0	0	0	27	0	0	0	0	11	13	0	11	0	5	0	28	26	30	0	28	23	0	0	29	30	6
	2.25	0	0	0	0	5	0	22	0	0	8	5	29	0	5	7	0	0	5	14	2	0	5	0	0	0	26	0	0	0	2	23	3	5	7	0	1	0	19	23	26	22	29	25	0	0	30	29	5
	2.75	0	10	5	0	22	0	27	0	0	21	0	1	0	0	4	0	0	6	22	11	0	0	0	0	0	28	3	5	0	5	30	14	5	19	5	0	7	19	17	30	21	30	25	0	0	24	30	14
	3.25	7	7	0	0	16	0	29	0	0	13	7	0	0	0	7	16	0	0	16	7	0	10	0	0	0	21	20	0	0	5	29	19	16	24	20	7	15	22	24	23	27	28	24	0	0	29	23	8
	3.75	6	9	0	0	20	0	24	0	0	15	21	17	0	0	7	9	0	0	8	20	2	2	2	0	0	17	18	5	0	7	30	26	18	24	23	20	19	29	26	30	27	30	30	0	13	30	30	15
	4.25	0	3	0	0	27	0	28	0	17	30	11	25	5	0	9	0	0	0	0	29	16	0	11	10	0	1	18	0	0	17	30	28	26	27	30	20	29	28	23	30	22	29	29	10	23	30	22	22
	4.75	0	11	0	0	15	0	30	0	1	28	24	17	0	0	22	0	0	6	0	25	20	0	5	5	8	5	20	0	0	20	30	24	29	28	29	26	29	21	24	30	24	26	22	25	29	30	26	22
	5.25	13	6	0	11	6	0	30	6	30	25	30	13	8	0	27	11	0	25	13	28	19	0	16	22	0	16	25	0	0	22	30	29	30	25	30	21	29	24	28	30	30	24	22	29	29	30	28	21
	5.75	20	6	20	14	15	3	30	6	20	18	24	30	0	8	28	26	11	5	8	30	14	6	6	20	21	26	29	7	0	29	30	17	30	22	30	30	30	30	30	30	24	30	28	29	30	30	24	27
	6.25	18	0	30	30	6	8	30	0	30	25	30	30	5	9	29	27	28	27	10	28	19	0	15	10	23	30	30	4	0	29	30	30	30	30	30	29	30	9	26	30	22	29	19	30	30	30	28	23
	6.75	24	0	30	30	7	9	30	0	30	28	29	26	8	13	26	26	29	19	17	30	24	0	20	20	18	26	25	5	0	30	30	21	30	30	29	30	30	30	11	30	25	29	23	30	30	28	30	26
	7.25	19	18	27	28	17	16	30	7	29	22	30	30	30	21	15	27	30	27	20	26	18	7	13	19	20	28	30	0	7	29	30	28	30	30	30	28	30	30	24	30	30	30	27	30	30	30	30	29
	7.75	25	7	24	28	27	16	30	20	17	29	30	30	18	20	29	23	29	21	0	15	21	6	19	18	27	26	27	0	17	28	30	30	30	30	30	30	30	24	30	29	26	30	30	30	30	30	14	25
	8.25	21	15	18	28	11	25	30	7	27	21	30	29	20	18	28	13	29	13	14	30	14	5	18	13	16	27	29	0	24	27	30	21	29	30	30	29	29	25	26	28	30	23	28	30	29	30	27	30
	8.75	21	0	18	22	24	6	30	18	29	30	16	30	13	19	23	28	25	22	21	28	16	19	11	24	28	26	25	0	15	28	30	30	30	30	30	29	30	30	30	17	30	29	29	29	30	28	29	30
	9.25	21	5	20	20	24	11	29	7	28	21	30	30	18	13	29	26	28	0	6	14	18	14	14	19	25	27	22	0	25	12	30	22	30	27	29	24	27	29	29	18	20	30	29	29	30	19	30	29
	9.75	17	0	10	9	22	0	28	0	30	7	30	30	0	0	6	18	25	6	0	6	27	14	2	13	6	26	13	5	24	0	30	29	30	21	30	24	17	27	28	21	29	30	30	30	22	24	28	27
	10.25	4	0	0	0	2	0	22	0	24	26	30	30	10	5	20	23	27	6	15	6	15	21	18	22	15	8	0	0	16	0	25	29	22	23	26	30	1	28	30	0	30	26	30	27	0	0	7	24
	10.75	0	0	0	0	13	0	19	0	7	24	21	29	4	5	23	6	11	7	0	0	0	14	0	4	15	6	0	0	0	0	1	23	0	0	18	29	0	21	22	0	29	26	29	30	0	1	0	24
	11.25	0	0	0	0	0	0	0	0	0	21	17	30	0	8	11	0	0	0	0	0	0	0	0	0	0	0	0	0	0	0	0	30	0	0	0	30	0	23	9	0	7	21	15	30	0	7	0	30
	11.75	0	0	0	0	0	0	0	0	0	5	0	6	0	0	0	0	0	0	0	0	0	0	0	0	0	0	0	0	0	0	0	26	0	0	0	29	0	0	19	0	0	0	5	30	0	0	0	15
	12.25	0	18	0	6	6	0	9	0	0	15	7	17	0	16	7	0	0	13	6	17	0	11	0	0	5	6	5	1	5	9	5	14	7	16	3	4	18	19	21	2	14	0	11	5	11	16	24	5
	12.75	12	7	24	13	28	15	30	0	0	30	24	21	22	30	30	27	26	30	5	30	2	18	0	0	11	28	15	18	0	29	0	26	15	30	13	0	23	30	30	23	29	22	30	0	30	30	30	0
	13.25	9	15	29	27	30	20	12	27	13	30	30	30	28	8	29	23	30	22	24	28	9	11	0	0	25	23	12	18	4	29	23	23	21	26	18	0	30	30	30	30	30	30	30	0	28	30	30	0
	13.75	26	19	30	9	30	30	22	26	14	30	30	30	5	29	20	28	9	30	6	20	17	17	23	0	30	7	27	16	6	30	27	24	17	0	29	15	30	27	30	30	30	30	30	0	30	30	30	14
	14.25	22	27	29	30	25	22	19	28	15	13	30	30	5	7	27	29	19	30	30	24	10	30	28	6	20	30	17	29	16	29	11	30	14	11	30	30	30	28	29	30	30	30	30	0	30	30	29	19
	14.75	20	8	30	20	30	5	23	29	23	30	30	29	23	14	27	16	30	14	11	30	0	11	11	12	30	30	30	15	28	30	28	28	14	24	30	30	30	30	30	30	30	30	30	5	27	29	30	30
	15.25	30	30	23	24	22	25	10	19	28	30	30	29	2	24	24	22	21	26	16	30	25	30	2	5	29	30	30	24	12	30	24	30	26	30	29	27	30	30	24	30	29	30	30	17	30	29	30	30
	15.75	18	24	26	20	29	29	17	9	14	27	30	29	16	13	30	30	26	22	22	21	25	21	27	0	30	29	29	23	0	30	13	30	30	30	30	30	30	30	30	30	30	30	28	27	30	27	30	30
	16.25	22	26	17	23	23	18	15	27	14	30	30	30	30	29	19	17	22	19	19	30	17	30	20	21	30	29	29	13	15	30	24	26	30	27	30	30	29	29	30	30	19	30	30	8	30	27	30	30
	16.75	17	15	27	28	28	9	23	28	30	30	27	30	30	30	29	30	30	23	21	24	25	18	20	1	21	29	30	22	25	30	16	30	28	30	30	30	30	27	30	30	25	30	28	5	30	30	24	23
	17.25	17	25	21	19	29	30	30	10	20	30	30	30	27	12	30	26	27	16	18	30	11	28	15	27	30	30	30	16	15	28	23	27	30	30	30	30	30	29	26	30	18	30	29	14	30	27	30	30
	17.75	30	27	30	30	28	17	30	15	29	14	29	30	18	1	30	25	22	25	7	28	25	23	23	25	30	29	25	16	16	23	30	23	19	30	30	26	30	30	30	23	24	30	30	28	30	29	30	21
	18.25	24	25	27	22	25	3	30	26	29	29	29	30	15	28	26	24	30	30	19	20	18	16	30	9	30	30	30	17	18	30	30	30	30	30	30	30	30	30	30	30	22	30	30	24	26	30	30	20
	18.75	30	27	25	22	29	17	30	11	16	30	30	29	30	17	30	23	23	18	18	29	30	18	27	11	30	30	22	30	22	26	30	30	30	30	30	30	30	30	22	25	21	30	28	0	30	25	30	22
	19.25	26	25	22	30	30	28	30	30	30	30	30	30	20	30	30	20	30	30	25	30	26	30	19	6	30	26	30	15	25	30	30	30	25	30	28	30	28	30	30	28	28	30	29	0	30	30	30	30
	19.75	23	26	21	23	30	30	30	30	30	12	30	30	30	30	25	30	30	21	25	30	22	29	27	0	8	28	28	24	30	30	28	30	30	27	30	30	30	30	30	25	12	30	27	0	30	27	30	30
	20.25	30	25	30	30	27	19	30	17	23	25	30	29	30	24	30	30	10	28	19	30	17	21	30	11	30	29	24	28	12	30	30	30	29	30	28	30	30	30	30	30	30	30	30	10	30	30	28	29
	20.75	30	28	22	30	18	30	30	30	25	25	27	30	22	30	25	30	25	30	15	30	29	20	30	11	30	30	30	22	2	30	30	25	24	29	29	28	30	30	30	30	30	30	30	18	30	30	30	25
	21.25	22	30	30	30	28	30	13	30	25	25	30	23	24	8	30	30	27	20	28	30	25	29	30	7	30	30	30	30	30	30	29	30	29	30	30	30	30	30	28	30	14	26	25	10	30	30	30	30
	21.75	28	21	23	30	30	30	21	15	30	30	30	30	30	30	30	20	30	12	28	30	27	30	30	22	21	30	20	26	22	30	28	24	30	5	30	30	30	30	30	29	23	27	30	6	28	26	30	23
	22.25	30	30	30	30	25	19	28	24	25	30	24	30	26	30	22	21	30	24	17	30	30	23	30	30	30	30	30	30	30	21	28	30	25	12	30	30	30	28	30	30	30	30	30	0	29	26	30	30
	22.75	28	30	30	30	14	30	23	30	30	28	30	30	30	30	30	19	30	30	26	30	23	30	30	23	30	30	30	28	21	29	30	25	22	30	30	30	30	24	30	30	23	30	30	15	28	30	30	30
	23.25	30	30	30	27	23	30	21	30	22	30	30	30	28	30	19	26	30	23	24	30	26	30	29	27	24	30	26	20	28	28	30	30	30	29	30	30	29	22	28	30	30	30	30	5	26	28	29	30
	23.75	24	26	24	28	12	19	22	6	13	28	30	30	25	13	30	29	3	24	29	29	17	20	30	0	30	30	0	26	6	30	30	30	25	27	15	30	29	30	30	30	30	21	30	7	21	30	30	30
	e: Day Sleep					f: Night Sleep
	Minutes					Minutes
	EEC>	EEC>upd3iKK	EEC>upd3iGD	EEC>upd2iSH		EEC>	EEC>upd3iKK	EEC>upd3iGD	EEC>upd2iSH
	221	376	295	411		548	556	672	625
	97	348	548	315		565	529	578	487
	213	489	554	357		601	649	657	680
	220	369	420	584		582	692	581	688
	331	430	511	487		599	615	594	624
	94	282	449	471		506	585	642	619
	602	423	471	443		549	620	612	620
	71	625	398	448		497	581	697	555
	324	433	557	489		498	431	684	664
	505	395	576	439		631	463	690	634
	441	389	546	351		677	640	666	615
	483	141	486	220		687	507	602	571
	144	534	629	580		517	511	666	597
	150	629	601	510		514	608	686	658
	401	608	448	512		630	614	674	613
	279	316	362	450		575	557	677	669
	272	401	565	475		560	695	705	604
	210	277	545	362		560	569	563	654
	304	504	487	356		458	630	662	609
	392	557	479	518		660	704	655	643
	243	677	478	412		456	675	690	670
	144	315	604	437		545	683	638	622
	170	624	467	279		512	509	688	618
	219	584	471			254	670	683
	222		605			615		657
	474		541			654		673
	385		492			579		690
	31		617			507		704
	128		446			388		697
			577					583
			488
	g: Sleep pattern
	Minutes/30 minutes
	Bin (hours)	w1118																																upd2,3Δ
	0.25	7	8	0	0	10	0	5	6	0	0	0	0	0	13	0	0	12	6	0	6	0	0	0	0	0	0	0	7	0	6	0	2	14	28	29	20	16	11	16	18	19	28	13	27	14	15	23	27
	0.75	12	30	0	0	0	0	0	0	19	18	10	0	11	0	0	0	2	0	0	10	9	0	5	0	0	0	12	7	0	8	0	3	5	26	19	0	0	0	11	28	0	21	5	18	13	10	27	20
	1.25	0	7	0	0	10	0	0	7	26	15	7	0	13	0	0	0	11	0	5	14	12	0	14	0	6	0	6	0	0	8	7	5	2	29	13	6	0	5	16	24	7	29	1	29	7	16	30	2
	1.75	7	0	0	0	13	0	5	13	30	10	0	0	13	13	1	0	0	0	12	19	24	0	18	5	0	8	0	18	0	15	3	0	7	24	12	0	5	14	24	24	0	29	10	30	14	21	24	0
	2.25	0	9	0	0	13	0	0	13	30	19	7	0	23	0	14	0	9	0	7	9	17	0	8	6	10	13	14	10	0	7	10	0	13	26	10	5	2	20	24	28	0	21	5	20	16	11	24	6
	2.75	9	17	0	0	17	0	5	12	23	11	17	0	23	0	12	0	9	0	12	18	15	0	1	0	10	17	14	11	0	3	9	0	5	17	24	0	17	3	29	28	0	28	14	18	7	23	26	9
	3.25	15	9	0	0	26	0	12	21	23	17	13	0	18	7	17	19	8	6	10	23	30	0	8	9	8	8	11	18	0	9	16	27	0	19	27	5	12	27	28	26	15	30	19	29	5	26	12	12
	3.75	18	12	0	0	30	0	10	12	29	12	5	0	27	9	8	24	6	6	5	23	17	18	10	23	5	0	6	18	5	4	12	21	16	18	21	11	12	20	23	28	9	30	26	21	12	29	16	29
	4.25	20	9	5	0	27	6	5	10	29	16	0	0	20	6	14	30	11	9	9	24	17	26	1	21	18	14	16	24	7	17	12	30	27	21	27	14	18	16	29	28	17	27	29	19	14	21	15	21
	4.75	30	10	0	0	29	5	6	11	30	12	8	0	28	1	0	18	0	9	4	30	30	20	10	17	5	19	27	26	5	10	11	24	21	18	28	12	21	16	25	29	7	26	21	25	1	15	13	0
	5.25	30	13	11	0	29	10	12	21	23	16	0	0	23	12	0	30	0	18	16	30	8	13	12	23	7	18	30	30	5	8	12	23	24	18	11	12	16	29	16	30	12	25	23	25	10	19	30	5
	5.75	4	0	8	9	21	0	11	23	28	17	6	0	23	14	13	28	8	18	19	30	19	17	16	29	7	29	16	27	0	10	8	30	27	20	23	0	14	26	30	30	11	23	24	21	17	12	29	24
	6.25	19	0	21	14	29	8	6	7	26	14	5	0	22	1	8	20	5	15	10	27	22	17	21	30	30	30	21	30	26	26	14	20	27	20	30	18	19	26	26	26	18	25	14	29	19	25	19	27
	6.75	30	8	30	23	22	0	2	11	28	7	5	0	28	11	11	30	11	18	11	28	30	5	30	26	30	29	17	24	30	30	16	30	19	11	19	27	4	27	29	25	17	20	16	18	3	14	19	27
	7.25	16	3	30	30	30	6	7	7	28	9	12	4	26	6	10	21	27	29	7	28	30	11	27	29	30	29	25	30	14	29	14	28	30	12	25	25	15	27	29	30	23	25	15	16	12	22	20	30
	7.75	11	0	20	12	23	30	29	22	27	9	0	8	30	0	30	30	21	27	0	30	24	13	30	28	30	30	20	25	26	30	5	19	8	12	24	13	24	25	28	26	17	22	12	30	17	21	27	16
	8.25	2	0	30	0	24	23	20	21	27	7	18	23	30	13	22	15	13	30	13	30	24	0	20	20	28	27	16	26	23	29	8	26	25	0	28	5	1	28	30	30	9	19	18	18	16	18	11	16
	8.75	12	0	30	0	20	21	17	20	28	5	15	30	26	0	20	15	17	29	10	20	11	0	13	22	29	24	8	8	24	28	2	26	30	7	26	11	11	21	21	24	14	28	7	30	7	23	13	21
	9.25	16	10	17	0	16	17	24	5	30	3	5	18	26	4	20	0	6	19	0	4	20	0	6	17	9	16	15	9	17	10	7	5	24	10	13	22	8	25	23	24	5	24	21	22	6	20	8	16
	9.75	8	30	29	0	15	11	16	17	30	29	0	8	24	6	10	9	9	20	0	3	17	0	6	0	0	19	6	2	16	14	9	10	27	14	12	17	17	16	26	27	11	26	7	24	0	2	22	25
	10.25	7	20	0	6	13	7	14	8	22	19	0	18	24	0	12	0	5	27	18	6	0	0	13	6	0	22	0	0	10	19	6	20	30	0	15	25	10	4	11	23	17	23	18	24	0	22	19	15
	10.75	11	0	0	0	30	0	15	8	24	8	2	11	20	0	0	0	5	9	19	0	14	0	11	0	0	11	4	0	0	9	0	5	22	0	12	15	0	14	10	17	19	21	11	15	0	20	15	27
	11.25	0	0	6	0	20	6	6	1	22	7	4	6	18	12	0	0	7	0	0	0	1	0	0	0	0	0	7	0	0	8	0	6	16	6	3	9	15	5	6	18	22	17	10	10	5	19	5	18
	11.75	0	0	0	0	13	0	0	8	22	0	7	0	0	12	0	0	0	0	12	0	0	0	14	0	0	0	0	0	0	0	0	0	0	0	7	7	0	0	18	24	23	24	16	19	15	15	3	13
	12.25	0	0	0	0	6	0	0	0	4	0	10	0	0	0	0	0	0	0	0	0	11	0	0	0	0	2	0	10	2	6	0	0	10	11	20	16	15	11	11	4	6	25	23	27	18	15	21	26
	12.75	0	23	0	0	25	5	0	5	27	16	20	21	0	0	7	7	0	15	15	0	28	24	3	0	0	26	0	30	21	5	0	8	26	27	26	27	30	27	30	24	7	30	30	30	30	24	30	30
	13.25	15	21	2	0	24	9	10	13	24	15	8	19	10	21	21	24	25	30	20	12	30	6	30	0	10	23	22	30	30	13	8	30	30	30	30	27	28	29	30	30	19	30	29	29	26	30	29	30
	13.75	26	20	20	11	30	23	11	30	30	23	15	30	19	19	24	20	30	21	28	9	28	0	14	16	29	29	30	16	20	30	15	23	30	28	23	30	29	27	19	30	10	30	30	29	26	16	30	29
	14.25	29	15	21	14	30	20	24	23	30	21	25	11	30	27	25	19	30	27	30	15	23	2	30	30	10	30	30	30	29	30	20	30	29	30	28	30	30	28	29	30	11	28	26	28	25	28	20	28
	14.75	23	22	30	0	30	21	30	24	24	22	9	30	10	24	30	22	30	21	21	24	30	25	11	21	30	30	30	30	25	30	21	20	30	29	29	30	21	25	23	24	0	30	30	30	29	30	27	26
	15.25	30	16	24	0	26	17	26	21	30	25	26	25	30	25	30	23	30	29	6	30	30	22	13	30	30	30	30	29	14	30	18	30	30	27	28	30	25	22	22	30	5	25	30	30	28	28	29	26
	15.75	26	24	30	14	28	22	30	20	12	28	20	22	18	30	25	26	30	28	30	29	30	14	30	30	4	30	20	24	30	30	30	21	28	29	26	30	29	29	25	30	17	30	26	23	25	24	30	26
	16.25	27	30	30	20	30	25	30	29	30	23	11	22	30	22	30	30	30	24	30	30	30	16	17	26	30	30	30	17	22	30	7	30	30	24	28	27	24	26	29	30	22	30	29	25	16	25	11	30
	16.75	21	30	30	28	30	26	30	19	30	20	6	15	24	20	22	16	29	25	30	29	30	19	23	30	29	30	30	26	30	29	28	30	7	27	28	30	18	24	14	30	25	17	25	19	15	30	23	30
	17.25	22	25	23	22	30	30	29	30	30	28	21	28	12	21	29	30	28	27	30	26	30	22	30	23	27	29	30	22	16	27	18	30	30	30	28	30	30	29	29	29	25	29	28	29	28	30	30	26
	17.75	30	18	29	26	30	26	21	22	30	22	24	26	24	30	17	29	29	30	30	30	30	23	27	30	26	30	30	29	30	30	20	26	25	28	29	30	30	26	30	30	23	28	27	28	18	30	30	30
	18.25	30	29	30	7	29	26	22	30	23	30	26	30	20	29	30	22	28	30	30	30	30	21	22	30	28	28	25	27	14	30	30	30	29	25	28	30	24	28	25	30	6	28	29	30	25	27	29	19
	18.75	24	21	30	19	30	26	30	30	30	25	17	25	23	30	30	7	18	30	16	28	30	17	30	30	28	27	30	30	30	30	30	30	30	30	28	23	29	25	27	30	14	30	26	27	17	0	26	24
	19.25	24	22	23	16	21	30	30	24	30	30	19	30	21	30	28	7	30	29	27	30	30	20	30	30	24	27	28	30	14	30	30	30	30	23	30	29	29	30	30	29	19	30	26	26	18	17	30	28
	19.75	30	23	30	30	30	30	30	25	27	29	30	30	22	25	30	27	30	30	30	30	30	17	30	30	30	30	30	30	23	30	29	30	30	29	27	30	30	24	29	28	14	29	29	28	22	22	28	25
	20.25	29	30	30	14	20	30	30	28	13	29	30	24	22	30	30	23	30	30	29	30	30	16	30	23	30	30	30	30	16	30	24	20	14	20	22	30	30	26	30	30	15	23	23	30	28	22	30	25
	20.75	28	27	30	30	29	30	30	30	18	30	30	30	30	30	14	29	30	19	30	23	30	7	30	30	23	30	30	30	30	30	30	30	28	30	25	30	30	30	30	30	23	24	29	22	21	30	23	29
	21.25	30	19	7	7	30	30	30	18	29	19	30	27	27	22	30	30	29	30	30	26	30	26	30	30	30	30	30	22	30	30	30	30	30	25	30	28	29	30	26	30	23	29	29	30	14	22	28	30
	21.75	30	28	30	30	30	30	30	30	30	30	30	30	16	22	30	22	29	30	30	30	30	30	30	27	15	30	30	22	30	30	23	30	30	27	25	30	25	27	25	30	22	30	27	29	13	20	30	30
	22.25	29	30	30	30	23	30	30	23	30	15	25	30	30	30	21	27	30	30	16	30	30	16	30	30	18	23	19	30	30	27	30	30	29	29	28	30	22	30	21	30	18	30	26	30	30	30	29	30
	22.75	30	16	15	0	26	30	12	20	20	21	23	14	17	23	26	5	30	17	14	26	15	15	30	14	7	15	9	3	20	24	9	12	29	24	24	27	29	23	16	30	27	28	20	30	19	24	30	28
	23.25	21	16	6	0	20	30	20	5	24	10	17	0	14	18	21	0	20	12	0	24	14	0	25	0	0	13	11	6	19	26	12	20	30	26	28	21	9	25	22	30	25	30	29	26	23	24	23	30
	23.75	21	12	4	4	19	25	9	5	20	25	5	10	9	15	19	4	11	10	6	24	14	5	22	6	5	10	4	8	18	14	10	20	19	29	21	26	11	24	28	29	20	28	22	11	14	23	30	17
	h: Day sleep				i: Night sleep
	Minutes				Minutes
	w1118	upd3Δ	upd2,3Δ		w1118	upd3Δ	upd2,3Δ
	284	306	419		585.5	535	634
	195	305	356		466	602	638
	237	420	458		504.5	622	640
	94	427	279		325.5	572	673
	480	371	257		618	546	607
	150	409	405		530.5	577	626
	227	352	528		505	568	602
	284	353	615		477	553	678
	604	564	292		616.5	641	673
	280	620	591		525	674	649
	146	610	355		485.5	629	648
	126	537	537		485	519	530
	496	612	230		485.5	564	572
	140	446	439		539	558	648
	222	522	450		543.5	647	654
	289	325	406		472	504	556
	202	594	453		591.5	640	613
	295	462	519		609	662	699
	199	398	635		528.5	482	674
	412	315	520		522.5	648
	391	229			625.5	560
	140	337			403	537
	294	457			558.5	643
	311	511			487	656
	262	269			418.5	642
	363	514			623	708
	291	421			602	610
	350	259			557.5	591
	208	382			540	664
	337	426			590	666
	181	443			451.5	504
	360				577	685
	j: Sleep pattern	Minutes/30 minutes
	Bin (hours)	EEC Cas9>																															EEC Cas9>upd2 CRISPR
	0.25	24.25	5.00001	5.00001	13	0	25	0	11	0	14	6	0	14	5.00001	0	0	6.99999	9	16	12	3.99999	0	0	11	23	18	8.00001	0	0	16	27		9	17	30	20	25	12	7	15	7	25	28	18	29	29	22	8
	0.75	23.75	5.00001	0	0	0	13	0	0	0	11	0	0	0	0	0	0	0	11	2.00001	5.00001	0	13	0	17	0.99999	20	0	0	0	12	30		13	17	29	0	29	18	17	17	0	6	28	24	30	28	28	1
	1.25	3	5.00001	6.99999	0	6.99999	0	5.00001	0	6	9.99999	5.00001	0	0	0	5.00001	5.00001	15	30	0	0	6.99999	0	14	12	3	0	0	0	17	15	0	7	17	30	8	30	13	11	15	0	20	28	29	25	28	27	0	11
	1.75	3	0	0	0	16	0	0	6.99999	9.99999	9	0	6	0	0	6	6.99999	11	30	18	3.99999	0	0	6	13	27	0	0	0	17	16	0	10	20	30	6	30	7	14	5	0	11	21	7	20	30	28	15	6
	2.25	5.00001	11	6	5.00001	6.99999	0	12	9.99999	8.00001	16	0	0	0	0	6.99999	15	9.99999	27	9.99999	9	6	6.99999	25	15	28	6	0	5.00001	9	17	0	12	25	30	9	30	22	1	0	0	28	27	0	27	23	28	8	11
	2.75	13	9	23	0	9.99999	0	9	14	20	26	0	5.00001	0	0	6.99999	22	20	24	8.00001	5.00001	6.99999	12	24	15	26	0	0	0	18	30	0	3	22	25	12	30	11	13	0	0	25	20	0	26	26	18	0	10
	3.25	28	14	26	5.00001	15	0	22	21	18	18	6	5.00001	0	6	8.00001	20	6.99999	23	16	15	12	20	19	13	29	0	9	0	15	21	12	20	23	30	21	30	23	5	5	0	21	17	0	23	30	26	5	7
	3.75	0.99999	2.00001	22	6	17	5.00001	24	12	27	6.99999	3.99999	17	0	6	13	20	14	22	17	3.99999	3	19	18	15	16	2.00001	9.99999	0	9.99999	26	0	10	23	27	17	2	23	14	11	0	26	22	9	27	21	26	0	19
	4.25	16	11	13	11	17	0	28	19	22	12	11	3	0	5.00001	14	20	25	22	13	0	12	12	22	6	5.00001	3.99999	5.00001	0	8.00001	21	12	17	20	30	21	16	2	25	18	5	29	24	20	27	29	28	0	16
	4.75	6	13	6	11	22	0	20	22	15	23	3	26	9.99999	15	23	19	27	18	18	9.99999	24	29	11	15	17	13	19	0	17	16	5.00001	13	28	29	26	30	24	26	11	17	19	8	9	30	27	28	11	26
	5.25	22	21	18	9.99999	20	5.00001	25	11	22	13	9.99999	19	9.99999	6.99999	21	21	18	28	8.00001	12	22	18	18	17	3	0	2.00001	6	23	29	0	25	24	29	27	30	30	27	17	23	29	17	16	30	29	29	14	18
	5.75	21	12	19	21	26	9	23	27	23	19	14	23	9.99999	11	26	22	21	20	25	6	9.99999	24	24	5.00001	12	6	28	0	25	25	11	21	30	27	27	30	25	30	10	22	26	25	22	29	29	28	18	27
	6.25	14	19	24	0.99999	29	0	21	26	19	18	22	28	15	27	26	23	23	29	22	5.00001	8.00001	28	26	18	26	5.00001	27	17	11	25	17	27	29	28	24	27	29	30	19	21	30	26	24	29	29	28	30	22
	6.75	21	19	18	12	22	0	30	26	29	17	25	20	16	24	17	15	30	21	27	3.99999	20	27	21	8.00001	2.00001	5.00001	30	3	14	17	16	24	29	29	25	29	30	10	18	30	30	22	24	30	29	27	22	30
	7.25	28	13	20	20	24	5.00001	29	19	22	23	20	29	15	28	21	28	30	28	17	9.99999	17	28	25	17	21	6	30	3	22	15	18	29	30	29	26	30	20	30	17	27	21	19	30	29	29	30	19	28
	7.75	29	14	24	19	28	2.00001	27	18	27	22	22	28	23	25	30	29	24	20	22	15	18	29	29	28	22	9	30	0	22	17	14	16	30	27	30	28	19	30	18	25	27	6	30	28	29	29	26	30
	8.25	13	24	14	8.00001	28	23	23	22	29	24	22	30	22	25	25	28	25	30	20	16	14	25	23	30	16	21	21	12	22	18	19	23	30	30	25	30	26	28	27	30	24	25	25	30	30	26	30	30
	8.75	23	5.00001	12	12	26	16	28	25	29	22	11	22	27	13	22	24	30	27	11	0	23	29	17	11	24	9	22	15	26	30	24	25	30	28	30	30	22	30	12	25	28	20	30	27	28	27	29	29
	9.25	24	14	21	0	6	6	30	23	28	3.99999	2.00001	9.99999	18	5.00001	25	24	18	29	22	5.00001	9	25	25	17	14	12	2.00001	17	17	25	12	18	30	29	30	30	30	21	23	29	17	23	30	22	29	24	24	28
	9.75	19	14	25	0	13	3.99999	20	15	22	23	0	26	0	12	20	21	30	23	8.00001	5.00001	6	25	27	20	13	6	6	0	21	25	9.99999	24	30	20	24	26	27	22	9	17	24	9	30	28	28	22	18	29
	10.25	17	5.00001	23	0	13	5.00001	30	9	11	9.99999	0	12	8.00001	30	9.99999	21	23	14	24	0	0	9	27	13	18	0	6	0.99999	26	13	3	4	18	29	20	30	26	21	15	8	13	17	22	29	29	30	23	25
	10.75	6.99999	0	22	0	20	0	30	9.99999	17	15	0	5.00001	9.99999	0.99999	0	14	14	30	16	5.00001	0	6.99999	14	11	23	0	0	5.00001	13	19	0	7	0	27	27	25	22	2	0	5	14	13	18	24	30	20	26	30
	11.25	5.00001	11	12	0	11	0	16	13	8.00001	21	0	9	0	0	0	0	18	16	11	8.00001	0	15	6	3	23	0	0	0	15	23	0	5	0	30	20	30	11	0	6	0	12	0	0	25	29	27	0	10
	11.75	0	0.99999	8.00001	0	0	0	0	0	0	12	0	5.00001	0	0	23	15	9.99999	20	12	14	0	0	14	6.99999	19	6	5.00001	0	0.99999	6.99999	0	0	0	29	9	26	5	0	6	0	10	5	0	25	29	28	0	0
	12.25	16	27	0	0	6.99999	9	13	11	16	25	0	5.00001	17	0.99999	19	25	30	9.99999	23	20	0	15	17	0	25	12	8.00001	5.00001	18	26	19	27	14	30	24	28	20	26	0	18	19	11	10	25	26	28	24	20
	12.75	30	21	15	27	17	9.99999	30	26	30	20	17	19	25	18	26	30	30	30	30	0	25	26	24	15	30	14	23	27	27	22	20	22	16	30	22	23	30	30	10	29	30	23	5	30	30	30	24	30
	13.25	29	30	24	12	29	25	24	23	19	29	22	19	29	29	30	30	26	30	30	0	25	28	19	17	30	27	18	29	15	25	28	26	25	28	18	24	28	11	24	30	13	27	29	30	30	30	30	30
	13.75	26	23	24	30	22	30	22	30	29	29	26	29	25	26	28	29	20	30	30	19	30	9.99999	19	25	30	29	27	25	25	29	30	30	30	30	7	24	30	26	3	30	28	30	30	30	30	30	30	30
	14.25	30	25	27	30	18	30	27	20	29	30	25	30	30	30	27	30	30	30	24	19	30	24	30	30	30	30	28	30	30	28	23	30	29	30	28	28	30	0	22	27	17	30	30	30	30	29	30	30
	14.75	30	23	8.00001	30	26	29	25	30	26	30	25	30	27	30	30	21	30	30	29	9.99999	30	29	30	28	30	29	22	24	21	30	30	29	14	30	30	26	30	14	30	30	30	30	30	30	30	30	30	27
	15.25	20	29	24	30	23	20	30	30	29	30	29	30	30	30	30	30	29	22	29	23	30	27	28	12	30	21	25	29	30	27	30	30	22	30	24	30	30	12	30	30	30	20	28	30	30	28	30	28
	15.75	30	23	25	30	19	17	30	30	30	16	25	21	22	30	30	30	29	9.99999	27	30	30	30	29	9.99999	30	30	30	30	14	30	30	30	19	30	30	25	30	1	28	30	30	30	30	30	30	30	30	30
	16.25	28	25	17	30	29	30	20	30	29	30	23	30	30	30	30	30	30	29	21	9.99999	30	29	29	25	25	27	29	29	11	30	28	30	26	30	30	30	30	30	27	30	24	27	30	30	30	30	30	30
	16.75	22	30	26	30	30	30	26	21	29	30	28	30	29	30	30	30	20	30	30	30	30	30	30	28	3	21	27	30	30	30	26	21	19	30	30	26	30	30	30	20	27	30	30	30	30	30	30	30
	17.25	30	29	26	30	30	30	25	27	21	30	29	30	30	30	30	30	30	30	11	30	26	30	23	19	27	30	25	21	25	30	25	30	21	29	30	18	29	30	18	24	25	30	30	13	30	30	30	30
	17.75	27	28	27	30	22	30	18	29	30	30	20	30	30	30	30	30	28	30	25	30	30	30	24	19	30	30	25	30	29	29	28	30	21	30	30	13	3	29	27	30	30	30	30	18	30	30	30	30
	18.25	29	30	30	30	0	30	30	28	0.99999	30	23	30	30	30	30	29	20	30	30	16	30	30	16	30	30	30	18	29	30	30	22	30	25	28	30	30	22	30	29	30	24	30	30	30	30	30	28	30
	18.75	29	30	30	30	28	30	30	25	15	30	30	30	27	30	30	29	30	30	16	25	29	27	28	29	30	30	29	30	30	25	28	30	22	30	30	30	30	30	7	28	30	30	30	30	30	30	24	30
	19.25	29	30	27	30	29	29	28	30	30	30	29	30	30	30	30	29	29	21	25	30	0.99999	30	30	3.99999	30	30	30	30	30	30	25	30	21	28	30	30	27	30	19	30	30	30	30	30	30	29	29	30
	19.75	22	30	21	30	30	30	27	30	30	30	30	30	30	30	30	21	28	20	29	17	16	30	27	21	30	30	25	30	30	30	30	30	30	30	30	30	11	30	30	30	30	30	30	30	30	30	30	30
	20.25	30	30	18	30	30	30	9	30	30	30	30	24	30	30	17	19	30	18	25	24	20	30	25	13	30	30	26	28	20	20	28	30	30	28	30	30	11	10	30	28	30	30	30	30	30	26	30	30
	20.75	30	30	17	30	30	30	29	24	30	30	30	30	30	30	25	21	30	14	26	6.99999	16	30	30	11	30	30	26	20	30	28	25	30	30	29	30	30	26	5	30	30	20	30	30	30	30	30	30	30
	21.25	30	30	24	30	3.99999	30	21	30	30	28	30	30	30	30	17	30	29	18	28	14	30	30	30	30	30	30	22	27	28	30	30	30	30	30	30	30	27	30	30	30	14	30	30	30	30	27	30	30
	21.75	28	30	20	30	12	18	30	30	30	30	25	30	30	30	27	20	29	27	22	30	30	30	30	23	30	30	30	26	30	30	27	30	30	29	30	30	23	28	22	24	18	30	30	30	30	30	28	30
	22.25	15	30	25	30	30	30	30	24	30	30	15	30	30	30	26	30	30	28	30	30	25	30	30	26	30	30	26	29	30	30	30	30	30	25	30	30	27	23	30	25	30	30	30	30	15	30	20	30
	22.75	26	30	30	21	30	30	30	29	30	30	18	21	30	30	16	30	30	11	30	30	30	30	30	30	30	27	24	29	30	30	30	30	30	30	30	30	29	27	30	30	30	30	30	30	27	30	28	30
	23.25	26	30	30	30	28	30	30	27	30	30	22	30	28	21	28	30	29	25	29	30	15	30	30	30	26	30	23	21	28	30	27	30	30	30	30	30	30	30	29	30	30	30	30	30	13	30	30	30
	23.75	28	30	22	22	30	18	30	14	30	28	0	26	30	24	27	26	11	30	20	30	11	28	27	30	30	18	22	23	29	30	25	30	30	30	30	30	27	27	28	30	30	30	28	30	30	30	23	30
	k: Day sleep				l: Night sleep
	EEC>Cas9 x				EEC>Cas9 x
	+	upd3KO	upd3KO		+	upd2KO	upd3KO
	365	501	391		604	668	691
	286	501	519		630	598	670
	378	607	684		535	703	668
	169	534	510		625	637	698
	402	448	652		567	658	694
	100	640	499		606	590	707
	496	570	448		582	507	702
	387	411	272		591	585	653
	459	633	332		612	633	691
	409	565	534		646	601	704
	195	282	429		534	700	453
	353	484	391		634	697	572
	227	535	647		642	690	702
	259	486	678		640	682	692
	395	587	644		598	699	703
	469	163	367		611	639	631
	505	523	493		617	683	614
	573	478	490		561	655	669
	399	504	519		583	620	665
	172	465	344		488	620	692
	244	668	321		557	646	671
	430	483	477		622	694	668
	477	520	574		622	708	650
	325	381	499		514	654	670
	444		592		659	651
	137				627
	284				557
	116				599
	416				603
	500				688
	213				605
	m: Sleep pattern (minutes/30 minutes)
	Bin (hours)	AstC Gut>																														AstC Gut>upd2i SH
	0.25	0	0	0	0	5.0001	0	0	0	0	0	0	0	9	0	0	0	0	0	0	0	0	3.9999	0	0	0	0	0	0	0	0	21	6.9999	0	0	0	0	17.0001	0	0	12.9999	12.9999	0	0	0.99999	0	9	6.9999	0
	0.75	0	0	0	0	0	0	0	0	0	0	0	6	8.0001	0	0	0	0	0	0	0	0	15	0	0	0	0	18	0	5.0001	0	20.0001	12.9999	6	0	0	0	21	0	17.0001	6.9999	18.9999	0	0	6.9999	0	0	0	0
	1.25	5.0001	0	5.0001	0	5.0001	14.0001	0	9.9999	0	0	0	3	0	0	0	0	6	3	0	0	0	11.0001	0	15.9999	0	0	0.99999	0	6.9999	0	17.0001	9	17.0001	0	0	6	27.9999	0	21	0	12	0	0	9.9999	0	9.9999	0	6.9999
	1.75	0	0	3.9999	0	0.99999	12	0	0	0	0	0	6	11.0001	0	0	0	0	6	0	9	0	18	8.0001	5.0001	0	0	0	0	6	3.9999	12.9999	12	21	0.99999	5.0001	2.00001	30	6.9999	26.0001	6	5.0001	8.0001	0	8.0001	0	0.99999	14.0001	0
	2.25	0	0	18	0	3.9999	9.9999	0	0	0	15.9999	0	6	21.9999	3	0	5.0001	0	0	0	17.0001	0	24	11.0001	0	0	0	6.9999	0	5.0001	0.99999	21.9999	23.0001	11.0001	6.9999	5.0001	18.9999	21	0	27	15	0	0	3.9999	12	0	0	9	5.0001
	2.75	9	0	0	0	0	5.0001	0	0	6	9	0	0	26.0001	3.9999	0	0	0	6	0	9.9999	0	20.0001	9.9999	5.0001	0	0	0	6	14.0001	12	21	14.0001	0	3.9999	8.0001	18	20.0001	0	30	5.0001	14.0001	5.0001	18.9999	11.0001	5.0001	11.0001	11.0001	18.9999
	3.25	11.0001	0	0	0	2.00001	0	8.0001	21	0	6	0	8.0001	8.0001	3	0	0	0	3	0	9.9999	0	20.0001	0	0	0	0	8.0001	0	14.0001	12	15.9999	12	24	27.9999	14.0001	14.0001	30	0	20.0001	8.0001	15.9999	0.99999	6.9999	29.0001	0	0	5.0001	11.0001
	3.75	0	0	12.9999	0	15.9999	0	12	0	0	0	0	8.0001	12	3.9999	0	0	5.0001	8.0001	0	12	0	11.0001	0	0	0	3.9999	0	3	6	15.9999	18	8.0001	18.9999	26.0001	11.0001	29.0001	26.0001	20.0001	23.0001	6.9999	15	11.0001	12.9999	0	0	12.9999	11.0001	9
	4.25	0	0	0	0	18.9999	0	15.9999	0	0	5.0001	0	12.9999	3.9999	3.9999	0	14.0001	15	11.0001	0	0	0	17.0001	0	11.0001	0	3	9	29.0001	0	0	23.0001	17.0001	24.9999	18	18	24	30	8.0001	27	6	27.9999	0	6.9999	11.0001	0	27	21	3.9999
	4.75	0	0	0	0	24	0	11.0001	0	0	0	0	9.9999	8.0001	5.0001	5.0001	3.9999	5.0001	0	6	0	5.0001	24	0	12	0	2.00001	18	0	5.0001	0	6.9999	14.0001	24	26.0001	26.0001	14.0001	26.0001	6.9999	30	12.9999	23.0001	12	15	5.0001	5.0001	30	8.0001	12.9999
	5.25	0	9.9999	0	0	12	18.9999	0	0	0	0	0	3	11.0001	6	0	0	0	0	5.0001	0	0	21.9999	21.9999	9.9999	0	30	5.0001	0	15	8.0001	21	24	9	26.0001	23.0001	15.9999	30	11.0001	27.9999	27	27	24.9999	6.9999	17.0001	15	24.9999	9.9999	3.9999
	5.75	0	6	0	0	15	6.9999	6	6.9999	0	15.9999	0	18.9999	18	0	2.00001	0	6.9999	9.9999	14.0001	2.00001	5.0001	15	27	18.9999	0	0	0	6.9999	21	6	27.9999	18	18.9999	24.9999	30	21	26.0001	29.0001	30	17.0001	27.9999	3	5.0001	15	15	18	14.0001	15
	6.25	0	0	6	0	6.9999	11.0001	0	0	0	0	0	0.99999	23.0001	15	27.9999	0	23.0001	6	6.9999	3	0	6	27.9999	6.9999	0	0	0	11.0001	12	0	30	30	27.9999	27.9999	27.9999	30	30	6	29.0001	20.0001	21.9999	0	21.9999	15	2.00001	24.9999	11.0001	18.9999
	6.75	20.0001	0	12	0	5.0001	0	0	23.0001	0	0	0	3.9999	11.0001	21.9999	12	0	29.0001	0	9.9999	6	0	24.9999	12.9999	0	0	0	6	21	2.00001	8.0001	27	18.9999	21	21.9999	18.9999	20.0001	27.9999	0	27	14.0001	20.0001	5.0001	24.9999	21.9999	15	17.0001	9.9999	0
	7.25	0	5.0001	27.9999	0	5.0001	17.0001	6	18.9999	5.0001	0	5.0001	5.0001	17.0001	5.0001	5.0001	0	21	0	0	8.0001	0	21	26.0001	0	3	0	12.9999	12	0	0	24	14.0001	0	21	15.9999	20.0001	24	0	29.0001	27	21.9999	0	20.0001	11.0001	8.0001	14.0001	17.0001	17.0001
	7.75	0	0	21.9999	0	8.0001	12.9999	0.99999	14.0001	0	0	6	2.00001	17.0001	17.0001	11.0001	0	5.0001	0	12.9999	6	0	29.0001	12.9999	0	3	0	18.9999	6	0	6.9999	24.9999	3.9999	0	24	15.9999	21.9999	27.9999	0	24	23.0001	24.9999	0	27.9999	11.0001	11.0001	29.0001	9	15.9999
	8.25	0	0	6.9999	0	0	0	21	6	0	8.0001	6	3	6	20.0001	0	0	6.9999	0	9.9999	5.0001	21	29.0001	12.9999	0	0	5.0001	0	15.9999	5.0001	12	27.9999	9	0	14.0001	24	14.0001	30	6.9999	9	18	20.0001	0	17.0001	23.0001	0	20.0001	9.9999	15.9999
	8.75	0	0	6.9999	0	5.0001	0	17.0001	14.0001	0	0	0	0	0	20.0001	0	0	6	3.9999	0	18	0	18	9	5.0001	0	0	0	20.0001	8.0001	12	27	0	0	0	24.9999	21	27.9999	30	9.9999	21	27	3.9999	24.9999	14.0001	0	0	5.0001	3.9999
	9.25	0	0	26.0001	0	5.0001	0	11.0001	8.0001	0	0	5.0001	5.0001	0	18	21.9999	21	6.9999	3	0	5.0001	0	21.9999	24	0	0	5.0001	0	5.0001	3.9999	3.9999	27.9999	6	0	0	15	11.0001	30	8.0001	5.0001	18	27.9999	0.99999	11.0001	2.00001	0	0	2.00001	8.0001
	9.75	5.0001	0	18.9999	0	6.9999	6	14.0001	0	0	0	0	12	5.0001	3.9999	6	0	26.0001	0	0	0	0	18	23.0001	0	0.99999	0	0	6	0	0	15.9999	0	0	6	0	6.9999	27	0	15	0	17.0001	0	0	27	0	0	0	18
	10.25	0	0	18.9999	0	0	24.9999	0	5.0001	0	5.0001	0	0	3.9999	0	18.9999	0	14.0001	0	5.0001	5.0001	0	11.0001	9.9999	0	6	0	27	2.00001	0	6	18.9999	6	12.9999	0	0	15	14.0001	5.0001	0	0	9.9999	0	0	5.0001	0	18.9999	0	12
	10.75	0	0	5.0001	0	0	9	0	6.9999	0	0	0	0	5.0001	0	0	0	15.9999	8.0001	5.0001	0	0	8.0001	0	0	0	0	5.0001	0.99999	0	0	17.0001	0	15	8.0001	6	21	21.9999	0	6.9999	0	6	9.9999	0	12	0	17.0001	5.0001	2.00001
	11.25	0	0	0	0	0	5.0001	15	0	0	0	9	0	6	0	0	0	5.0001	2.00001	0	0	0	3	0	0	0	0	6	3.9999	0	0	0	0	0	0	0	11.0001	20.0001	0	0	0	17.0001	9	9	12.9999	0	6	11.0001	8.0001
	11.75	5.0001	0	0	0	0	0	5.0001	0	0	0	0	0	0	0	6	0	17.0001	12	0	0	0	12.9999	12	0	0	0	21	6.9999	5.0001	6	0	11.0001	5.0001	0	0	12	0.99999	0	5.0001	0	11.0001	0	12	20.0001	0	0	5.0001	0
	12.25	0	0	0	0	0	0	0	0	0	11.0001	0	0	6	9	0	5.0001	8.0001	0	0	0	15.9999	17.0001	15	5.0001	15.9999	0	9.9999	5.0001	8.0001	0	23.0001	21	20.0001	15.9999	9	20.0001	0	21	20.0001	21.9999	21	6.9999	15.9999	21.9999	12	18	8.0001	15
	12.75	6	6	18	6.9999	0	11.0001	12.9999	23.0001	8.0001	3.9999	0	0	14.0001	0	0	0	12.9999	15	0	0	9.9999	20.0001	21	0	29.0001	24.9999	0	0	5.0001	23.0001	30	24.9999	15.9999	12.9999	12	18.9999	26.0001	12	15	11.0001	9	30	29.0001	30	3	27.9999	9.9999	14.0001
	13.25	8.0001	23.0001	20.0001	18	0.99999	6	27.9999	29.0001	24	21	6.9999	0	5.0001	0	6.9999	9.9999	14.0001	6	11.0001	0	18	21	27.9999	5.0001	29.0001	30	9.9999	11.0001	5.0001	27.9999	30	20.0001	27.9999	24.9999	27.9999	23.0001	29.0001	21.9999	3.9999	6	15	18	30	24.9999	18.9999	29.0001	15.9999	26.0001
	13.75	0	6.9999	18	11.0001	9	27	24	27	9.9999	6.9999	26.0001	0	24.9999	0	20.0001	15.9999	24	11.0001	21.9999	9	15.9999	14.0001	15.9999	12.9999	29.0001	30	30	30	18	20.0001	30	15	21	24.9999	29.0001	20.0001	29.0001	20.0001	3.9999	12.9999	23.0001	27	29.0001	21.9999	18.9999	21.9999	12.9999	18.9999
	14.25	6	8.0001	27.9999	15	12	18.9999	21	9.9999	11.0001	0	30	15	12	12	12	18	30	9	12	6	21	11.0001	17.0001	2.00001	30	9	30	27.9999	21.9999	26.0001	30	29.0001	23.0001	21.9999	15	30	27.9999	15	3.9999	26.0001	23.0001	29.0001	30	12.9999	6.9999	27.9999	21	29.0001
	14.75	8.0001	24	27	3.9999	23.0001	11.0001	17.0001	23.0001	8.0001	5.0001	30	11.0001	12	21.9999	21	18	23.0001	5.0001	15	0	20.0001	29.0001	17.0001	9	27.9999	21	11.0001	12.9999	17.0001	12.9999	30	18	27	24.9999	14.0001	27.9999	21.9999	24	2.00001	12.9999	29.0001	11.0001	30	29.0001	18	27.9999	27.9999	26.0001
	15.25	17.0001	30	30	12	27.9999	12	6.9999	20.0001	17.0001	23.0001	30	0	18	0.99999	15.9999	15	12	0	0	6	23.0001	24.9999	27	12.9999	30	30	11.0001	18	0	15.9999	30	15.9999	23.0001	30	27	24.9999	30	18	12.9999	23.0001	24	8.0001	30	9	18	27.9999	24	30
	15.75	8.0001	27.9999	9	24	15.9999	23.0001	6	5.0001	18.9999	6.9999	30	18	24	23.0001	0	24	26.0001	0	6	12.9999	9.9999	6	20.0001	11.0001	30	27.9999	20.0001	6	12	12.9999	30	24.9999	27	24.9999	29.0001	27.9999	27.9999	18.9999	3	23.0001	21.9999	27	30	30	0	27.9999	27.9999	24.9999
	16.25	3.9999	9.9999	9	6.9999	9.9999	11.0001	21.9999	6	11.0001	9.9999	18.9999	26.0001	23.0001	0	0	21.9999	21.9999	6.9999	21	6.9999	0	12.9999	18	15	30	30	0	18.9999	26.0001	0.99999	30	26.0001	9	0	15.9999	26.0001	27.9999	27.9999	21	30	26.0001	24	18.9999	18	15.9999	30	6.9999	30
	16.75	12.9999	24	9	0	8.0001	14.0001	27.9999	15.9999	24.9999	0	18	15.9999	23.0001	0	12	14.0001	21.9999	15.9999	12	6.9999	6	3	0	11.0001	29.0001	29.0001	9	12.9999	21	24.9999	27.9999	27	20.0001	21.9999	12.9999	0.99999	29.0001	26.0001	9.9999	21	20.0001	24	21	30	20.0001	27.9999	14.0001	18.9999
	17.25	18	26.0001	21.9999	6	23.0001	21.9999	17.0001	15	20.0001	11.0001	26.0001	26.0001	27	0	12.9999	23.0001	24	18	5.0001	5.0001	8.0001	24.9999	30	18	30	20.0001	6	18.9999	12	2.00001	30	30	15.9999	23.0001	20.0001	15	30	9	30	20.0001	30	9.9999	21	30	24.9999	18.9999	24	27.9999
	17.75	6.9999	27.9999	20.0001	0	15.9999	18.9999	14.0001	20.0001	18	2.00001	27.9999	24	26.0001	21.9999	15.9999	8.0001	18.9999	9.9999	5.0001	6	24	5.0001	14.0001	21.9999	24	18	18	21	27	15	23.0001	12.9999	27.9999	23.0001	27.9999	26.0001	30	24	20.0001	26.0001	27.9999	18	26.0001	29.0001	21.9999	24	27.9999	30
	18.25	9.9999	3	27	11.0001	20.0001	21.9999	12.9999	18.9999	18	24.9999	27.9999	26.0001	14.0001	9.9999	15.9999	0	18.9999	3	3.9999	20.0001	24.9999	21	12	20.0001	24.9999	21	18	15.9999	9	15	30	29.0001	29.0001	15.9999	20.0001	15.9999	27.9999	21.9999	27	26.0001	21.9999	27	30	21	30	27	27	29.0001
	18.75	21	18	30	15.9999	9.9999	29.0001	24	27	20.0001	21	12.9999	17.0001	29.0001	12	6.9999	18	20.0001	17.0001	20.0001	30	21.9999	30	18.9999	18	30	30	0.99999	29.0001	26.0001	15	30	24.9999	15.9999	21.9999	30	23.0001	30	15	21	30	21.9999	30	18.9999	30	29.0001	21.9999	30	30
	19.25	29.0001	21.9999	27.9999	21	15	12	27.9999	14.0001	11.0001	14.0001	0	11.0001	21	9.9999	29.0001	23.0001	30	18	24	6	27.9999	20.0001	20.0001	21.9999	21	24	0	27.9999	15	21	29.0001	30	15	27	17.0001	27.9999	29.0001	6.9999	6.9999	24.9999	9	26.0001	27	30	29.0001	29.0001	14.0001	29.0001
	19.75	26.0001	30	29.0001	18	15	29.0001	15	11.0001	17.0001	17.0001	9	17.0001	24	15.9999	8.0001	18	24	29.0001	18	9.9999	27	30	20.0001	24	12	27.9999	6	30	12.9999	29.0001	24	21.9999	14.0001	12.9999	30	30	29.0001	29.0001	12	29.0001	27	27	30	30	30	29.0001	26.0001	30
	20.25	24	18	27	23.0001	18	27.9999	24.9999	21	24.9999	8.0001	5.0001	20.0001	29.0001	27.9999	14.0001	20.0001	20.0001	18	17.0001	9.9999	24.9999	24.9999	27.9999	29.0001	2.00001	26.0001	9	30	24	23.0001	27	30	30	18.9999	27.9999	27	30	26.0001	27.9999	30	21.9999	29.0001	23.0001	20.0001	30	15	29.0001	27.9999
	20.75	23.0001	15	23.0001	26.0001	27.9999	24.9999	8.0001	24	9	18.9999	6	15	29.0001	20.0001	20.0001	12	26.0001	15.9999	15	21.9999	21.9999	17.0001	17.0001	21	5.0001	29.0001	9	30	27.9999	18.9999	21	30	9.9999	29.0001	30	21	30	26.0001	15	30	27.9999	24	26.0001	30	27	30	18.9999	30
	21.25	27.9999	27.9999	24.9999	18.9999	29.0001	12.9999	27	17.0001	17.0001	21	14.0001	15.9999	23.0001	24.9999	18.9999	30	29.0001	12	0	21	0.99999	9	26.0001	23.0001	24.9999	24.9999	29.0001	27	27.9999	0	30	29.0001	21.9999	8.0001	26.0001	26.0001	30	30	30	18.9999	26.0001	21.9999	21.9999	26.0001	21.9999	29.0001	21.9999	27
	21.75	21.9999	24	30	5.0001	30	30	27.9999	27.9999	24.9999	20.0001	12.9999	24.9999	24.9999	29.0001	27.9999	17.0001	24.9999	20.0001	20.0001	21	21	18	30	15	8.0001	23.0001	9.9999	27	30	12	29.0001	21.9999	30	30	24.9999	26.0001	30	17.0001	18	30	30	30	27.9999	23.0001	20.0001	30	30	29.0001
	22.25	0	11.0001	3.9999	6	12	17.0001	11.0001	12	8.0001	0	14.0001	12	15.9999	9.9999	0.99999	8.0001	18.9999	15	12.9999	0	12	18.9999	6	17.0001	9.9999	18	9	11.0001	27	15	18.9999	27	21	6.9999	11.0001	8.0001	27.9999	15.9999	12.9999	20.0001	15.9999	18.9999	23.0001	26.0001	12.9999	6	20.0001	27
	22.75	0	0	6	0	0	15	0	3	5.0001	0	0	15	11.0001	11.0001	12	0	9.9999	0	0	14.0001	0	8.0001	9	0	0	9.9999	0	18.9999	14.0001	3.9999	12.9999	29.0001	20.0001	18.9999	21.9999	20.0001	24.9999	5.0001	9	15.9999	18.9999	14.0001	11.0001	27.9999	3	0	17.0001	29.0001
	23.25	5.0001	5.0001	0	0	0	15	0	0	0	0	0	5.0001	18	0	3.9999	0	9	0	0	9	6.9999	20.0001	24	0	5.0001	8.0001	0	0	5.0001	0.99999	24.9999	24	9	12	17.0001	5.0001	30	6	12	11.0001	21	18	21	12.9999	9	6.9999	11.0001	18.9999
	23.75	0	3.9999	0	0	0	9.9999	6	0	0	0	12	6.9999	8.0001	0	0	0	18.9999	0	0	6	0	15.9999	9	0	0	15	0	5.0001	6	0	12.9999	26.0001	18.9999	9.9999	14.0001	20.0001	14.0001	0	0	9	18	5.0001	18	5.0001	11.0001	0	3.9999	15
	n: Day sleep	Minutes			o: Night sleep	Minutes
	AstCGut>				AstCGut>
	w1118	upd2-i SH	upd3-i KK		w1118	upd2-i SH	upd3-i KK
	55	468	263		283	634	625
	21	270	86		392	588	360
	191	257	397		439	493	524
	0	284	117		249	461	354
	145	289	189		323	510	509
	153	367	419		420	511	556
	143	138	334		382	642	543
	134	439	360		370	437	466
	11	265	350		326	338	546
	65	425	162		246	509	445
	31	94	186		359	530	588
	114	246	363		322	504	543
	231	301	241		462	590	638
	150	76	275		260	569	598
	116	291	90		275	432	486
	44	195	153		319	534	585
	214	207	36		488	471	496
	82	259	132		245	614	537
	75	225	88		240	609	624
	116	434	519		229	539	389
	31	85	434		362	609	595
	404	185	394		422	440	568
	249	343	210		443	484	468
	90	234	326		313	611	416
	13	162	288		477	565	434
	49	192	332		528	429	438
	163	306	452		247	612	508
	156	434	358		435	539	662
	134		330		398	576	595
	114		36		336		673
	p: Sleep pattern
	Minutes/30 minutes
	Bin (hours)	TK Gut>																																TK Gut>upd2-i SH
	0.25	0	0	0	0	0	0	0	0	0	0	0	0	0	0	0	0	0	0	0	0	0	0	0	0	0	0	0	0	0	0	0	0	0	0	0	0	0	0	0	0	5.0001	0	0	0	3	0	0	0
	0.75	0	0	0	0	0	0	0	0	0	0	0	0	0	0	0	0	0	2.00001	0	0	0	0	0	5.0001	0	0	0	0	0	0	0	0	6	0	0	0	0	0	0	0	0	0	0	0	12	0	0	0
	1.25	0	0	0	0	0	0	0	0	0	0	0	0	5.0001	0	8.0001	0	0	12.9999	0	0	0	0	0	6	0	0	0	0	0	0	0	0	0	5.0001	0	0	0	0	0	0	0	0	0	0	18.9999	0	0	2.00001
	1.75	0	0	0	0	0	0	0	0	0	0	0	0	3.9999	0	5.0001	0	0	15	0	0	0	0	0	0	0	0	0	0	0	0	0	0	0	15	0	3.9999	6	6	0	0	0	6.9999	0	0	20.0001	0	0	20.0001
	2.25	0	0.99999	0	0	2.00001	6.9999	0	0	0	0	0	0	12.9999	0	5.0001	0	0	6.9999	0	0	0	0	0	0	5.0001	0	0	0	0	12.9999	0	0	0	12	0	12.9999	18	9.9999	6	0	18	9.9999	0	0	21	0	0	12
	2.75	0	5.0001	6.9999	0	11.0001	0	0	0	0	0	0	0	14.0001	6	17.0001	0	9.9999	14.0001	5.0001	6	0	0	6	17.0001	0	0	0	0	6.9999	14.0001	0	0	0	14.0001	0	14.0001	15.9999	15	14.0001	0	0.99999	20.0001	17.0001	0	21	0	0	8.0001
	3.25	0	11.0001	6	0	18	15.9999	0	12.9999	0	5.0001	0	15	11.0001	6	15	0	15	9	6	20.0001	0	0	18	11.0001	21	0	5.0001	6	6.9999	12.9999	0	0	6	24.9999	0	18	15	18.9999	15.9999	0	21	30	15	8.0001	12	18	17.0001	24
	3.75	5.0001	3.9999	23.0001	0	24.9999	27	0	15.9999	5.0001	5.0001	0	0.99999	21.9999	18	21.9999	18	17.0001	27	15	30	0	5.0001	18.9999	6.9999	27.9999	0	21.9999	9.9999	0.99999	9	5.0001	5.0001	12	30	0	18	15.9999	27	24.9999	2.00001	24.9999	24.9999	23.0001	11.0001	26.0001	18.9999	20.0001	23.0001
	4.25	0	18.9999	8.0001	0	17.0001	18.9999	11.0001	9.9999	12	0.99999	24	12.9999	27	20.0001	20.0001	3	21.9999	21	24	27.9999	5.0001	17.0001	26.0001	21.9999	27	0	20.0001	6	23.0001	26.0001	18	5.0001	20.0001	29.0001	0	17.0001	21.9999	24	23.0001	12.9999	30	29.0001	27	17.0001	18.9999	12.9999	17.0001	24.9999
	4.75	11.0001	21	8.0001	9	29.0001	26.0001	9	23.0001	12.9999	23.0001	2.00001	24	17.0001	26.0001	23.0001	18	21	20.0001	24	24	9	15.9999	15	17.0001	30	0	8.0001	14.0001	15	21.9999	15	0	21.9999	26.0001	0	24	20.0001	29.0001	24.9999	18.9999	30	26.0001	26.0001	12.9999	29.0001	24	29.0001	21
	5.25	30	18.9999	18	5.0001	27.9999	27.9999	18.9999	20.0001	18.9999	5.0001	9	27	21.9999	17.0001	29.0001	18.9999	15.9999	18.9999	24	12.9999	21	15	21	27.9999	30	0	21	17.0001	15.9999	23.0001	14.0001	0	26.0001	21.9999	5.0001	18	27	30	15.9999	29.0001	29.0001	30	27.9999	24.9999	21.9999	30	27	30
	5.75	30	30	18	0	24	30	0	30	18	30	18.9999	24.9999	21.9999	6.9999	30	18	30	12	17.0001	18.9999	27	30	21.9999	21	29.0001	0	26.0001	15	20.0001	30	30	17.0001	27	20.0001	18	24	26.0001	24.9999	21.9999	30	26.0001	20.0001	27.9999	15.9999	24.9999	17.0001	23.0001	29.0001
	6.25	8.0001	30	24.9999	0	26.0001	30	26.0001	17.0001	17.0001	30	27.9999	24	18	18	17.0001	23.0001	23.0001	18	20.0001	30	21.9999	30	30	29.0001	29.0001	6	30	14.0001	21	18	21.9999	27	24	30	6	23.0001	24.9999	26.0001	30	29.0001	30	23.0001	24.9999	27	24.9999	15.9999	29.0001	30
	6.75	21	30	21.9999	14.0001	30	30	24.9999	23.0001	15.9999	20.0001	0	30	21	27.9999	30	20.0001	27	12.9999	24.9999	24.9999	20.0001	17.0001	30	30	30	0	24.9999	12	18	15	30	24.9999	30	30	18	30	30	30	29.0001	27	21	18	29.0001	21	26.0001	30	20.0001	27
	7.25	23.0001	30	24.9999	3	21	30	3.9999	24	17.0001	15	21.9999	18	15.9999	12.9999	23.0001	17.0001	27.9999	15	23.0001	18.9999	30	23.0001	11.0001	26.0001	30	6.9999	18.9999	12	26.0001	8.0001	30	30	21.9999	24.9999	9	15.9999	24	30	21	27.9999	24.9999	20.0001	29.0001	26.0001	17.0001	18.9999	26.0001	24.9999
	7.75	30	27.9999	18.9999	0	30	30	30	24.9999	6.9999	27.9999	0.99999	30	30	24	30	24	29.0001	30	23.0001	27.9999	18	18	9.9999	11.0001	30	0	29.0001	6.9999	5.0001	8.0001	30	30	23.0001	30	15	23.0001	29.0001	30	18.9999	23.0001	30	26.0001	26.0001	26.0001	21.9999	21.9999	15	30
	8.25	30	26.0001	24.9999	12.9999	30	18	15	30	9.9999	21.9999	5.0001	11.0001	24	30	24.9999	9.9999	18.9999	23.0001	23.0001	12.9999	21	17.0001	30	6.9999	30	0	9.9999	9	6	30	30	24.9999	9	18.9999	0	24	24	27	18	24.9999	15	23.0001	23.0001	15.9999	24	24	21.9999	24.9999
	8.75	17.0001	12.9999	30	8.0001	30	24.9999	9.9999	30	12.9999	21	0	30	18	26.0001	30	9	18	6.9999	15.9999	11.0001	24.9999	21.9999	14.0001	17.0001	29.0001	0	14.0001	8.0001	9.9999	29.0001	30	21.9999	9	24.9999	9	17.0001	18.9999	18.9999	20.0001	9	21.9999	6.9999	18.9999	27.9999	15.9999	20.0001	30	21.9999
	9.25	0	26.0001	23.0001	0	18	30	0	30	14.0001	14.0001	11.0001	23.0001	0	0	24.9999	12.9999	15.9999	20.0001	26.0001	18	12.9999	30	15	17.0001	0	0	21.9999	3.9999	0	9.9999	15	18.9999	27.9999	26.0001	0	20.0001	24	18	11.0001	0	0	0.99999	23.0001	12	18.9999	0	18.9999	30
	9.75	12.9999	12	8.0001	8.0001	3	17.0001	8.0001	24	0	11.0001	6	27	9	6	18	0	0	5.0001	12.9999	15	15.9999	15.9999	15	15	18	0	6	6	0	14.0001	27.9999	30	0	0	3.9999	14.0001	17.0001	26.0001	18.9999	0	12	14.0001	9.9999	6	26.0001	15	0	21.9999
	10.25	6.9999	6.9999	15.9999	0	8.0001	18	5.0001	11.0001	6	3.9999	0	11.0001	14.0001	8.0001	29.0001	15	9.9999	0	5.0001	12	14.0001	15	0	21.9999	12.9999	0	2.00001	0	0	6.9999	6	14.0001	0	0	2.00001	0	6.9999	6.9999	0	5.0001	12.9999	5.0001	6	0	12	0	0	9
	10.75	3	6	6.9999	0	12.9999	11.0001	0	14.0001	0	3.9999	0	0	6	0	21.9999	0	0.99999	9.9999	11.0001	0	0	0.99999	0	3	20.0001	0	0	0	0	6	0.99999	3.9999	0	0	0	0	5.0001	5.0001	0	0	6	0	6	0	8.0001	0	6	11.0001
	11.25	0	0	0	0	3.9999	0	0	0	0	0	0	0	0.99999	0	17.0001	0	0	0	0	0	0	0	0	17.0001	0	0	0	0	0	11.0001	0	2.00001	0	0	0	0	0	0	5.0001	0	0	0	11.0001	0	3	0	0	0
	11.75	0	0	0	0	0	5.0001	0	0	0	0	0	0	0	0	0	0	0	2.00001	5.0001	0	0	0	0	6	0	0	0	5.0001	0	0	0	0	0	0	0	0	0	0	0	0	14.0001	0	5.0001	0	21	0	0	0
	12.25	0	0	0	18	9.9999	9	0	0	3.9999	0	0	8.0001	6.9999	0.99999	0	0	9.9999	27	0	6	12	0	0	3	0	0	18.9999	0	20.0001	0	6.9999	0	12.9999	15	24	18	9	0	8.0001	0	11.0001	9.9999	11.0001	3	18.9999	18	17.0001	0
	12.75	17.0001	24.9999	0	17.0001	30	24.9999	18.9999	12	30	0	8.0001	15	30	29.0001	18	20.0001	30	0	24	24.9999	30	15.9999	0	30	24.9999	12	30	15	23.0001	27.9999	18.9999	14.0001	12.9999	9	30	8.0001	30	14.0001	30	18	11.0001	8.0001	30	30	8.0001	9.9999	18	0
	13.25	23.0001	30	6.9999	30	30	30	21.9999	30	30	8.0001	20.0001	18.9999	30	29.0001	30	12	30	15.9999	30	15.9999	30	21	15	24.9999	30	27.9999	30	29.0001	17.0001	30	18	30	21.9999	9.9999	30	21.9999	30	29.0001	8.0001	17.0001	30	23.0001	30	30	23.0001	15.9999	9	21
	13.75	20.0001	29.0001	30	6.9999	27	30	27	30	30	9.9999	29.0001	9	30	27.9999	30	12.9999	30	14.0001	30	26.0001	30	17.0001	18.9999	27.9999	30	27	30	18.9999	15.9999	18.9999	21.9999	30	17.0001	17.0001	30	20.0001	30	26.0001	30	17.0001	21.9999	18.9999	30	30	30	30	21.9999	30
	14.25	14.0001	15.9999	30	30	15.9999	30	23.0001	30	30	15	17.0001	30	30	27.9999	30	15.9999	30	9.9999	30	30	30	24.9999	8.0001	26.0001	21.9999	29.0001	30	12.9999	29.0001	21	21.9999	30	24.9999	23.0001	30	30	30	29.0001	30	29.0001	30	30	30	30	30	18.9999	15.9999	29.0001
	14.75	26.0001	21	30	30	23.0001	30	30	30	30	15.9999	27	30	30	24.9999	30	21	30	21	30	24.9999	30	14.0001	21.9999	30	30	26.0001	30	21.9999	24	24.9999	18	30	17.0001	27	30	24.9999	30	27.9999	30	29.0001	23.0001	30	30	30	30	15.9999	30	30
	15.25	20.0001	30	30	30	27.9999	30	20.0001	30	30	29.0001	30	30	30	27.9999	30	23.0001	30	30	30	27	30	24.9999	17.0001	30	26.0001	27.9999	30	24.9999	23.0001	29.0001	17.0001	30	27	27.9999	30	30	30	29.0001	30	30	30	17.0001	30	15	30	29.0001	30	20.0001
	15.75	30	29.0001	30	30	27.9999	30	30	30	24	24	30	30	30	24	30	30	30	30	30	5.0001	30	18.9999	18.9999	26.0001	30	23.0001	30	23.0001	24	30	23.0001	30	18.9999	21.9999	30	21	30	29.0001	21	30	30	30	30	12.9999	30	30	6	30
	16.25	21	23.0001	30	30	27.9999	30	30	30	14.0001	21.9999	11.0001	30	30	27	30	15.9999	30	27.9999	30	30	30	30	30	30	30	30	30	26.0001	30	30	27	30	30	30	30	18	30	26.0001	30	30	30	30	30	27	24.9999	30	30	30
	16.75	27.9999	30	30	30	18	29.0001	20.0001	30	29.0001	21.9999	9.9999	30	24.9999	12.9999	30	29.0001	30	30	30	30	24.9999	30	30	21.9999	30	29.0001	30	9.9999	18	26.0001	29.0001	30	17.0001	26.0001	30	24	30	30	30	29.0001	30	30	30	23.0001	30	15.9999	18.9999	30
	17.25	30	30	30	30	30	30	30	30	30	29.0001	18.9999	30	24	11.0001	30	30	30	29.0001	30	18.9999	14.0001	17.0001	18	30	30	29.0001	30	23.0001	24.9999	26.0001	27	30	23.0001	30	30	12.9999	30	23.0001	30	30	30	30	30	30	27.9999	30	20.0001	30
	17.75	30	30	30	30	30	30	29.0001	30	18.9999	24.9999	12.9999	30	27	18	30	14.0001	30	30	30	30	15	30	21.9999	21	30	24.9999	30	27	30	30	23.0001	30	17.0001	27.9999	30	29.0001	30	29.0001	21.9999	27.9999	30	30	23.0001	30	30	30	23.0001	30
	18.25	30	30	30	30	24	30	21	30	30	20.0001	17.0001	30	30	30	30	30	30	30	30	21.9999	9.9999	26.0001	17.0001	24.9999	30	27	30	21	30	23.0001	21.9999	30	21.9999	21.9999	30	30	30	23.0001	26.0001	30	30	30	26.0001	20.0001	30	20.0001	21.9999	30
	18.75	30	30	30	30	18	30	21.9999	30	30	30	23.0001	30	30	30	30	30	30	24.9999	30	30	20.0001	21	30	15.9999	30	30	30	9	21	30	24.9999	30	15.9999	30	30	24	30	24	30	30	30	30	30	23.0001	30	27	29.0001	30
	19.25	30	30	30	30	27.9999	30	30	30	30	30	14.0001	30	30	30	30	26.0001	30	30	30	21.9999	27.9999	30	30	30	30	30	30	27.9999	27.9999	30	30	30	18	30	30	23.0001	30	18.9999	21	29.0001	30	30	29.0001	21.9999	24.9999	26.0001	29.0001	30
	19.75	30	17.0001	30	30	15.9999	23.0001	30	30	30	30	26.0001	30	30	30	30	24	30	30	30	30	30	30	30	27.9999	30	5.0001	30	23.0001	29.0001	24.9999	21	30	30	24	30	18	30	30	21	27.9999	30	30	30	30	30	30	15.9999	30
	20.25	30	30	30	30	15	30	15.9999	30	30	30	18.9999	30	17.0001	30	30	30	30	14.0001	30	27.9999	24.9999	27	30	9.9999	30	0	30	18	30	15.9999	30	30	30	27	30	21.9999	30	30	29.0001	30	30	30	30	21.9999	30	12.9999	24.9999	30
	20.75	30	23.0001	18.9999	30	30	30	9.9999	30	8.0001	30	21.9999	30	26.0001	30	30	21.9999	30	30	30	0	24	30	21.9999	30	30	0	0	12	29.0001	30	30	0	30	30	30	27.9999	30	30	27	30	30	30	24.9999	24	30	30	23.0001	30
	21.25	21	18.9999	0	30	30	30	30	30	17.0001	30	11.0001	30	30	30	30	30	30	30	30	0	26.0001	21	15.9999	24.9999	30	0	5.0001	24	24.9999	21	18	11.0001	30	21	30	17.0001	18.9999	18.9999	30	15.9999	30	30	27	30	30	30	23.0001	30
	21.75	23.0001	21.9999	15	0.99999	30	14.0001	30	12.9999	23.0001	17.0001	20.0001	24	11.0001	30	23.0001	24.9999	18	8.0001	14.0001	14.0001	6.9999	18.9999	29.0001	24.9999	20.0001	0	18.9999	0	24	0	30	0	17.0001	30	18	23.0001	18.9999	18.9999	30	24	2.00001	30	24.9999	30	29.0001	30	30	30
	22.25	17.0001	18	11.0001	0	18.9999	12.9999	17.0001	0	17.0001	0	18	0	9	18	6	18.9999	0	15	15.9999	18.9999	17.0001	6.9999	0	18.9999	9	0	11.0001	0	15.9999	15.9999	18	0	15.9999	18.9999	18.9999	24.9999	17.0001	18	15.9999	20.0001	9	21.9999	20.0001	18.9999	27	23.0001	15.9999	6
	q: Day sleep	Minutes			r: Night sleep	Minutes
	TKGut>				TKGut>
	w1118	upd2-i SH	upd3-i KK		w1118	upd2-i SH	upd3-i KK
	228	264	289		515	479	635
	318	383	152		550	557	582
	288	86	273		493	643	626
	60	317	278		534	528	579
	367	370	116		539	612	587
	397	403	307		611	538	674
	162	319	71		496	576	568
	340	239	399		569	569	614
	167	373	139		524	563	593
	238	334	129		426	601	501
	127	376	156		412	623	557
	309	252	113		538	537	590
	314	448	237		556	652	632
	253	267	314		531	557	596
	440	300	174		577	467	642
	207	425	385		480	560	561
	302	263	138		585	573	563
	302	50	282		511	500	543
	305	264	298		593	546	568
	311	271	161		464	528	633
	241	454	156		502	622	586
	272	476	434		470	634	607
	282	327	177		433	553	645
	334	414	302		547	543	498
	399	30	369		631	427	663
	13	367	92		388	584	612
	259	461	324		565	581	626
	145	395	210		383	603	641
	175	242	342		545	452	517
	306	313	100		518	608	584
	304	467	239		486	643	586
	255	264	142		484	550
[truncated: 59 more columns]

## Sheet: Figure 1 - figure supplement 1
	Figure 1, supplement 1
	a: Relative expression						b: In situ hybridization
	EEC>			EEC>
	w1118	upd2-i SH		w1118	upd3-i KK
	1.315	0.927		0.637	1.288
	0.69	1.355		0.969	1.259
	1.107	0.489		1.398	0.726
	0.911	0.761		1.118	0.791
	1.523	1.009		1.2	0.677
	0.454	1.483		0.678	0.59
	c: Sleep pattern
	Bin (hours)	voila TS>
	0.25	6	0	0	27	26	0	5.00001	0	0	24	0	6.99999	0	5.00001	0	16	0	0	16	0	0	0	0	26	0	19	9	5.00001	0	0	5.00001	0	0	0	0	0	0	0	0	6.99999	23	0	0	0	11	0	0	0
	0.75	0	0	6	26	0	0	18	0	0	23	0	0	0	0	0	0	0	0	0	0	0	0	0	21	0	0	0	0	0	0	0	0	0	0	0	0	0	0	0	0	16	0	0	0	0	0	0	0
	1.25	0	0	0	26	0	0	0	0	0	25	0	0	0	0	0	0	0	0	0	0	0	0	0	6	0	0	0	0	0	0	0	0	0	0	0	0	0	0	0	0	6	0	0	0	0	0	0	0
	1.75	0	0	6	5.00001	0	0	0	0	0	20	0	0	0	0	0	0	0	0	0	0	0	0	0	24	0	0	0	0	0	0	0	0	0	0	0	0	0	0	0	0	0	0	0	0	0	0	0	0
	2.25	0	0	17	0	6	0	6	0	0	5.00001	0	0	0	0	0	0	0	0	0	0	0	0	0	28	0	0	0	0	0	0	0	0	0	0	0	0	0	0	0	0	0	0	0	0	0	0	0	0
	2.75	0	0	11	0	14	0	6.99999	0	0	14	5.00001	0	0	0	0	0	0	0	0	0	0	0	0	29	0	0	6	0	0	0	0	0	0	5.00001	0	0	0	0	0	0	6	0	0	0	0	0	0	0
	3.25	0	8.00001	21	0	20	0	24	0	5.00001	19	0	0	0	0	0	0	0	22	0	13	0	0	19	30	0	5.00001	0	0	0	0	0	0	0	5.00001	9.99999	0	0	0	0	0	17	0	0	0	0	0	0	18
	3.75	0	21	13	0	27	0	24	15	0	24	0	0	0	0	0	0	0	13	0	26	0	0	26	29	0	15	17	0	0	0	0	0	0	0	9.99999	0	0	0	6.99999	0	14	9.99999	0	0	0	0	0	22
	4.25	5.00001	30	24	6	30	0	30	5.00001	28	21	29	9.99999	0	0	0	16	0	15	5.00001	23	0	0	25	24	6	24	24	0	12	0	0	0	0	5.00001	0	0	0	5.00001	0	0	15	5.00001	0	5.00001	0	0	0	30
	4.75	0	30	18	6	30	0	30	26	30	24	29	29	8.00001	0	12	28	0	25	9.99999	29	6.99999	13	25	30	5.00001	30	28	5.00001	29	5.00001	0	0	0	17	0	0	6	25	6	0	14	14	0	3	0	0	0	30
	5.25	5.00001	30	18	16	30	9.99999	30	29	30	25	27	16	25	0	27	29	26	20	24	30	29	15	29	30	11	30	27	29	24	16	6	0	0	18	0	6	16	30	0	12	20	18	0	20	6	0	0	19
	5.75	3	30	17	29	30	25	30	29	30	27	29	13	29	0	30	30	29	21	26	30	24	19	29	30	29	30	30	30	28	24	17	0	5.00001	14	8.00001	6.99999	0	30	0	6.99999	20	25	8.00001	30	11	0	13	12
	6.25	13	30	19	29	30	29	29	30	30	28	30	22	25	0	30	30	27	30	30	30	30	12	28	30	24	30	30	30	22	29	28	9	0	22	26	22	12	30	15	2.00001	28	21	0	22	19	0	23	27
	6.75	28	30	28	30	30	20	27	30	27	30	30	12	30	0	30	30	28	19	30	30	29	30	30	30	26	30	30	30	27	29	29	25	0	24	27	28	13	30	6.99999	8.00001	21	26	0	30	30	0	23	22
	7.25	30	24	27	30	28	29	30	29	29	30	30	19	29	0	30	30	9.99999	30	27	30	30	30	27	29	23	30	30	30	24	25	29	26	0	22	20	29	13	29	12	30	25	27	0	19	29	3	30	26
	7.75	15	30	20	30	30	24	30	30	29	30	30	22	30	13	30	27	0	18	29	30	29	25	30	30	30	30	30	30	29	27	30	19	0	28	29	28	28	30	0	29	13	27	0	24	24	22	29	20
	8.25	16	30	19	26	27	29	30	28	30	30	30	19	30	21	30	30	0	17	29	30	29	30	28	27	29	30	29	30	29	27	29	28	0	22	28	30	30	30	16	30	18	19	0	15	26	29	20	5.00001
	8.75	0	29	23	22	29	24	26	23	30	29	30	20	30	19	30	30	0	15	30	30	30	29	28	28	29	29	17	30	20	30	28	22	0	14	19	30	18	30	27	30	20	22	3.99999	26	27	30	28	0
	9.25	0	29	16	26	29	30	29	6	30	30	30	20	29	25	30	30	0.99999	30	30	30	29	22	27	28	29	25	0	30	6.99999	29	0.99999	24	5.00001	6	30	30	18	21	17	30	8.00001	6	0.99999	23	29	30	29	5.00001
	9.75	0	30	26	21	25	28	28	6.99999	23	30	25	15	30	26	30	28	6	8.00001	30	28	29	30	6	14	21	6.99999	0	30	0	30	0	24	0	18	28	28	16	9.99999	21	30	0	6.99999	0	19	26	30	25	0
	10.25	0	23	27	30	8.00001	18	20	5.00001	17	30	24	5.00001	12	3	28	0	0	0.99999	27	19	30	14	0	0	30	0	0	30	0	27	0	23	0	0	29	26	11	0	29	30	0	0	0	15	25	29	25	0
	10.75	0	20	17	30	0	0	0	0	0	30	25	0	5.00001	0	24	0	0	0	30	0	29	0	0	0	29	0	0	30	0	29	0	29	0	0	19	22	14	0	23	30	0	5.00001	0	6	25	30	26	0
	11.25	0	30	17	11	0	0	0	0	0	30	6.99999	0	0	0	28	0	0	0	25	0	30	0	0	0	29	0	0	30	0	24	0	21	0	0	30	25	16	0	16	20	0	0	0	0	21	19	22	0
	11.75	0	28	6	5.00001	0	0	0	0	0	28	0	0	0	0	22	0	0	0	27	0	16	0	0	0	29	0	0	30	0	18	0	23	8.00001	0	12	0	15	0	21	15	0	0	0	0	9	5.00001	23	0
	12.25	0	0	6	9	17	0	5.00001	0	0	0	0	11	18	0	0	0	0	5.00001	3	3	0	0	13	25	2.00001	0	5.00001	8.00001	6	6	0	0	5.00001	28	0	0	0	0	0	0	21	6	9.99999	11	0	0	0	5.00001
	12.75	16	0	30	25	18	12	30	25	14	0	15	14	16	0	0	11	0	13	18	23	0	0	20	29	0	28	29	0	9	0	26	0	11	29	5.00001	0	5.00001	0	0	0	29	15	0	27	3.99999	0	0	19
	13.25	30	0	15	27	30	0	30	23	22	0	6	30	28	0	3	6	0	25	14	24	0	3.99999	26	26	0	30	30	9.99999	11	0	15	0	11	21	0	0	5.00001	29	0	0	30	16	5.00001	30	9	0	0	27
	13.75	30	0	16	27	30	0	30	30	30	0	26	30	24	2.00001	3.99999	21	26	16	12	25	0	20	30	27	0	30	30	17	28	0	22	0	21	27	5.00001	5.00001	6	30	0	0	30	3.99999	0	16	3.99999	0	0	30
	14.25	30	0	27	29	30	14	30	30	26	8.00001	29	30	21	12	3.99999	19	26	24	21	29	0	6	30	28	0	30	30	21	22	11	23	14	26	29	26	19	18	30	0	0	29	20	8.00001	27	0	0	0	28
	14.75	30	0	0	30	30	0	30	29	30	30	30	26	26	13	17	23	29	23	17	20	0	18	30	30	5.00001	30	30	20	27	20	30	2.00001	18	22	30	15	17	30	0	0	30	19	9.99999	24	6.99999	5.00001	0	30
	15.25	27	14	5.00001	29	30	17	30	28	30	30	30	30	23	12	6	29	26	29	29	21	11	21	27	20	9.99999	30	30	30	29	30	25	24	29	30	24	30	30	26	8.00001	0	30	19	18	24	29	18	0	29
	15.75	23	26	20	30	30	5.00001	30	30	26	30	16	29	29	17	24	11	24	26	29	23	30	30	30	15	26	30	30	30	24	5.00001	22	14	29	29	30	15	19	30	12	0	28	25	24	30	30	30	0	30
	16.25	17	30	13	30	30	9.99999	30	30	0	30	29	25	30	26	30	30	22	22	25	19	30	14	30	14	28	30	30	30	22	30	30	26	15	29	25	20	30	24	15	0	30	6	25	26	30	30	15	22
	16.75	15	30	19	30	30	13	30	29	26	30	30	20	30	23	19	17	30	28	18	23	29	30	30	19	15	30	30	30	29	30	30	30	16	27	21	21	11	28	18	0	30	24	20	21	30	20	30	22
	17.25	30	30	17	29	30	25	30	30	30	30	24	29	30	21	22	30	23	23	28	24	29	9	30	30	29	30	30	30	30	23	17	20	30	26	25	22	8.00001	15	18	0	30	21	27	25	29	20	24	28
	17.75	24	19	27	30	30	23	30	30	9	30	30	25	30	21	22	30	21	18	27	16	27	24	24	30	24	30	30	30	30	12	30	9.99999	21	25	25	22	29	30	11	6	30	16	25	30	30	28	28	30
	18.25	29	26	23	25	28	15	30	30	0	30	30	30	30	6.99999	29	23	30	30	16	29	30	26	30	30	28	30	30	30	21	19	29	30	30	30	19	30	22	25	20	5.00001	30	24	23	24	28	27	21	29
	18.75	30	18	25	27	30	19	30	30	8.00001	30	30	28	30	0	30	19	14	21	30	25	30	19	29	30	29	30	30	30	29	29	30	30	18	30	27	20	25	30	11	0	30	20	21	30	30	30	30	20
	19.25	15	29	30	24	30	24	29	30	11	30	30	30	30	21	21	30	30	27	22	27	29	24	30	29	30	30	30	30	30	30	23	17	28	29	13	30	30	22	16	0	29	23	25	16	22	28	28	30
	19.75	26	11	15	12	30	23	29	30	30	30	27	24	30	30	27	29	30	30	30	25	30	26	29	28	26	30	30	30	30	30	30	29	30	30	30	21	26	30	19	14	30	30	27	30	30	30	27	30
	20.25	30	29	29	30	30	20	28	30	30	30	25	30	30	30	17	28	26	30	29	30	26	15	30	30	30	30	30	30	30	30	30	30	26	29	30	30	24	22	16	30	30	28	30	23	29	30	28	30
	20.75	16	30	18	22	30	20	30	30	9.99999	30	30	22	30	29	27	30	30	30	25	20	15	30	30	30	30	30	30	30	23	30	23	30	16	28	26	30	30	30	30	30	30	23	30	20	30	28	24	30
	21.25	23	30	9	30	30	23	30	30	30	30	30	29	30	29	30	27	28	30	27	29	30	29	22	30	30	30	30	30	27	30	29	9.99999	28	23	27	26	22	30	5.00001	30	28	27	29	30	29	30	26	30
	21.75	5.00001	29	20	0.99999	30	21	30	30	25	30	30	24	30	28	30	30	30	30	30	22	25	25	30	29	24	30	30	30	21	30	29	30	6.99999	21	24	27	30	30	23	22	27	23	15	26	30	29	30	30
	22.25	30	27	5.00001	27	30	25	30	29	30	30	20	29	30	26	30	30	29	30	30	30	26	30	28	29	17	30	30	30	21	30	27	14	28	30	29	30	6.99999	30	18	8.00001	30	25	23	25	30	26	25	30
	22.75	30	30	25	24	30	30	30	29	30	30	30	30	30	29	30	30	25	30	30	30	21	26	30	25	30	30	30	30	28	22	30	30	17	30	21	22	30	30	29	30	29	30	28	30	29	30	18	30
	23.25	30	30	24	30	30	22	30	25	30	30	30	29	30	28	30	27	30	30	30	27	22	14	26	30	30	30	30	30	29	19	27	30	30	30	15	30	27	30	30	9.99999	20	30	28	26	29	30	22	25
	23.75	19	29	13	19	29	22	29	23	3.99999	27	17	28	26	26	29	9	29	21	25	16	28	22	15	27	29	28	28	30	21	23	26	28	17	20	25	29	19	25	28	29	9.99999	19	26	18	30	30	29	24
	d: Day sleep					e: Night sleep						i: Motion bout length						j: Motion bout length						k: Motion bout activity						l: Motion bout activity
	voila TS>					voila TS>						EEC>						voila TS>						EEC>						voila TS>
	w1118	upd3-i kk	upd3-i GD	upd3-i TRiP		w1118	upd3-i kk	upd3-i GD	upd3-i TRiP			w1118	upd3-i kk	upd3-i GD	upd3-i TRiP			w1118	upd3-i kk	upd3-i GD	upd3-i TRiP			w1118	upd3-i kk	upd3-i GD	upd3-i TRiP			w1118	upd3-i kk	upd3-i GD	upd3-i TRiP
	121	525	341	477		555	577	690	493			24.4546	28.3333	32.1818	23.4211			64.1	10.7778	29.7692	8.78571			1.94744	1.03207	1.8393	1.0876			0.982772	1.371	1.20536	3.0479
	482	396	492	268		467	482	504	596			57	17.84	15.48	18.6			43.4	17	24.2727	58.125			1.10982	0.909133	1.96334	2.57037			1.96155	1.54449	0.754483	1.18355
	396	586	566	446		431	617	611	617			31.5882	23.625	10.0435	5.53333			9.66667	5	7.08696	16.7647			0.981718	0.929412	1.42956	1.51364			2.35022	1.65934	1.35623	2.0183
	431	484	643	445		596	672	644	516			36.5	8.16667	23.4	24.8462			14.0909	18.6154	7.41667	23.4167			1.74953	1.87202	1.02691	1.01108			1.48033	1.37366	2.83468	1.72986
	449	378	464	553		692	681	574	639			10.4737	7.26471	20.3125	10.619			18.4667	5.22222	14.1905	11.9286			1.83205	2.04909	1.1161	1.49223			0.942984	0.785623	1.25027	3.53859
	266	584	536	412		383	690	660	522			55.5833	16.8889	21.7619	22.9231			26.3684	9.56	9.35	17.15			1.05873	2.56147	1.85496	2.68605			0.982629	1.83389	2.29414	1.29774
	453	482	479	350		690	564	664	540			7.72222	11.24	44.5714	14.6471			20.8571	21	16.1765	23.6111			1.54005	0.868515	1.23768	1.53897			1.04836	2.29247	1.05616	2.08483
	292	510	472	422		660	562	634	587			47.2	38.8889	6	27.8333			25.5556	5.48	19.2	26.0769			1.00638	1.2346	1.69732	1.20424			1.6527	1.48431	1.19338	1.33069
	368	588	496	473		481	699	632	624			7.66667	11.2273	11.8461	6.21429			35.4545	17.2857	13.05	15.875			2.70023	1.34399	1.55032	1.59897			2.30028	2.47564	1.33844	1.2394
	606	495	608	387		575	668	606	265			20.1333	19.5	13.4074	4.11429			10.2917	25.75	9.25	48			0.90029	1.00125	1.27524	2.84608			1.10027	1.5825	0.947769	1.12876
	410	429	588	395		594	611	653	455			17.8571	16.913	19.6111	16.8333			29.5833	31.4	8.4375	24.75			0.930557	0.988457	1.31535	1.52679			1.00177	1.03024	2.29801	1.81488
	229	459	565	429		632	582	642	552			38.25	21.5	42.2143	10.8696			21	4.04	7.66667	11			0.937028	1.06202	1.49665	2.00847			0.987354	3.24699	2.6332	2.4406
	312	627	526	440		661	571	701	519			26.5454	5.6	4.65	6.1			34.6667	24.2308	13.8667	27.9			1.11227	1.72357	2.34422	2.21538			1.40103	1.68642	1.46876	3.32878
	112	425	628	382		430	565	695	430			13.68	17.9231	4.28571	4.92857			60.5	22.5882	4.18182	18.7222			1.50708	0.898453	3.54943	1.95772			1.3283	1.5065	3.28768	1.25805
	411	343	263	321		481	672	667	488			21.5454	10.2727	18.7143	9.94118			36	24.3125	16.4138	26			2.47406	2.16364	2.93792	1.45733			0.881001	1.28882	0.707737	1.37491
	354	436	507	537		539	463	699	599			37.0769	11.8333	26.4706	10.0556			36.4545	14	7.65517	15.5			1.40936	1.09366	1.38619	1.76278			1.75564	3.91071	1.58113	1.38587
	127	531	313	450		558	685	646	648			32.9375	18	26.9167	9.32			76.3333	21.8	25.0625	30.2727			1.67962	1.01735	1.8095	4.5886			1.11409	1.99635	1.16233	1.0939
	284	409	330	444		591	656	635	508			23.1579	24.9333	24.6111	11.8095			29.6667	32.2	9.6875	12.8077			2.55911	0.725769	1.49308	1.21516			2.00709	1.46792	1.27514	2.17677
	425	398	564	375		565	705	613	476			11.7586	22.3333	21.2727	7.8125			18.9412	7.66667	20.55	22.0556			1.34913	0.681546	0.990845	1.02598			1.57063	1.55892	2.02062	2.94498
	408	545	485	562		560	662		523			25.4762	9.86364	20.375	14.7222			33.9	22.6154	5	26.375			1.72395	1.09851	0.704974	1.76248			1.23146	2.41679	2.09889	1.47014
	400	445	625	321		468	616	690	456			35	27.8333	2.38889	11.125			47.1818	3.54546	11.6429	27.5			1.38519	1.16229	3.15833	1.40502			2.13423	1.86422	1.51846	2.20873
	269	643	473	466		462	694	613	521			30.6667	24	50.625	5.68182			67.125	4.76471	15.6316	24.6			0.667082	0.941706	1.32989	1.24858			1.68434	2.79786	0.764664	2.40465
	357	639	436	489		649	645	695	610			28.6818	19.0417	4.17391	7.83333			19.7368	41.2857	17.1071	27.125			2.10019	0.796187	3.17623	1.73272			0.850583	1.37465	0.890033	1.24537
	523	455	415	353		640	669	538	532			24.9048		5.72	11.2174			8.33333	13.1	21.6154	22.2			1.69787		1.96636	2.17787			0.870851	2.2035	0.882636	4.04661
	379	602	450	502		474	657	679	606			9			6.41176			17.05	23.3636	11.9474	21.125			1.75658			2.17774			0.985006	1.88056	1.25777	0.748293
	364	465	493	389		687	630	581	343			15.8636			7.61905			29.7692	14.3571	21.45	43.625			1.58659			1.03461			1.2413	1.38245	2.11596	1.51575
	307	548	326	457		692	602	622	592			39.9333			15.0588			36.5	18.4	19.0714	27.4546			0.904128			2.24545			1.89038	1.31265	1.46117	1.10883
	429	560	478	451		618	645	661	423									23.3809	25.5833	9.47059	22.2308			1.0772			1.54165			0.941438	2.14801	1.00746	1.05475
	251	426	559	417		577	675	654	408									21	8.83333	6.23529	22.1818						1.77369			1.07017	2.43621	2.47346	3.14839
	369	667	624	468		489	706	674	360									45.6667	12.4706	3.5	12.625						1.71758			1.20643	0.71467	4.00623	1.50533
	202	508	694	537		603	578	698	453									41.2143	15.25	9.82353	15.9565									0.843957	0.958934	1.3375	1.77954
	273	422	552	318		448	650	617	444									20.8333	16.3636	9.4	12.7143									0.881463	3.60429	0.810025	2.69593
	18	539	554	412		507	628	674	494									23.7778	12	18.0833	24.9									1.3173	1.04312	1.55569	3.79279
	220	529	528	397		652	576	594	518									41.6667	15.1429	13.875	11.2105									1.02476	2.6984	0.820133	3.84216
	325	530	528	509		502	662	621	540									27.1	9.68182	10.8	11.3529									1.31636	1.19162	1.12135	1.26213
	311	515	636	510		494	677	644	513									68.5714	2.32258	15.8333	23.4									1.09367	2.21446	3.37771	2.96216
	226	655	442	527		470	672	709	540									37.1053	31.7	6.94444	17.8333									1.33429	2.97401	1.09571	2.65189
	300	489	601	399		606	607	556	487									69.3636	5.11765	19.2353	27.3333									1.64783	0.928351	1.85555	1.14324
	217	636	436	511		327	689	602	589									12.3056	8.94737	6.53333	31.1									0.979992	1.61452	2.30665	3.04086
	310	562	622	417		214	675	610	398									21.6957	13.25	10.4583	33.875									0.856608	1.91812	1.15195	1.92946
	284	519	479	484		670	686	644	480									28.3529	11.1053	17.3333	18									2.31342	2.257	1.56856	1.11327
	232	520	417	500		493	678	642	547									21.8095	17.8125	15.9091	55.8889									0.736658	1.65724	1.17819	1.21388
	13	460	547	503		477	633	689	354									81.75	24.3333	13.25	28.2143									0.873792	0.987072	1.55202	1.94652
	257	481	557	421		589	570	634	248									41.1875	9.4	27.125	29.5454									1.27354	1.23668	1.47406	1.94072
	318	578	503	390		548	632	688	398									42.4167	19.2857	20.375	16.1429									0.890443	1.21858	1.99458	1.22464
	227	332	557	522		499	642	704	560									14.5238	31.9	9.75	17.7143									2.10102	0.991364	1.00027	3.47695
	316	557	560	496		405	492	664	391									32	10.4545	5.47619	30.1667									1.12597	0.707877	2.27632	1.68953
	236	611	623	472		638	709	695	553									48.3333	9.45	16.25	32.3333									0.91722	2.60099	1.6922	1.4221
	424	537	472	382		642	690	647	599									19.65	28.9091	14.2308	18.4667									1.16735	2.08825	1.99057	4.325
	288	402	549	357		442	635	664	353									37.8125		12.4118	40.1									1.22727		1.50454	2.07081
	282		535	479		509		602	586									64		16.2857	23.2222									0.967638		2.11545	1.20943
	467		492	334		538		638	560									35.9286		7.95455	13.6316									1.22855		1.70551	1.53175
	227		584	530		503		659	634											8.58823	6.88889											1.90866	3.18417
	351		585	477		447		693	535											11.5	28.6											2.2234	3.88079
	252		614	659		509		708	642											17.5	24.1177											1.36032	1.1861
			544	479				678	635											5.75	31.5833											2.17782	2.39502
			575	493				689	375											9.85714	11.7											1.73066	1.04151
			534	383				698	517												45.1429											1.45883	4.13993
				514					585												34.5385												3.02985
				453					438																								2.39373
				341					468
	f: Sleep pattern
	Bin (hours)	upd3-i KK/ +																																	EEC>upd3-i KK
	0.25	0	0	0	0	0	0	0	0	0	0	0	0	0	5.00001	0	0	0	0	0	0	0	0	0	0	9	0	0	0	0	0	18	0	0	0	0	22	17	6.99999	11	0	30	25	16	11	5.00001	23	29	16
	0.75	0	0	0	0	0	0	0	0	0	0	0	0	0	0	0	0	0	0	0	0	0	0	0	0	0	0	0	0	0	0	21	0	0	0	0	0	0	0	0	0	28	2.00001	0	0	0	23	24	3.99999
	1.25	0	0	0	0	0	0	0	0	0	0	0	0	0	0	0	0	0	0	0	0	0	0	0	0	0	0	0	0	0	0	8.00001	0	0	0	0	6.99999	5.00001	0	0	0	17	0	14	2.00001	8.00001	20	28	9
	1.75	0	0	0	0	0	0	0	0	0	0	0	0	0	0	0	3	0	0	0	0	0	0	0	0	0	0	0	0	0	0	0	0	0	0	14	9	0	0	0	0	9	0	2.00001	3.99999	0	21	27	11
	2.25	0	0	0	0	0	0	0	0	0	0	0	0	0	0	0	2.00001	0	0	0	9.99999	0	0	14	0	9	0	0	0	0	0	0	0	0	0	0	2.00001	6	0	0	0	18	0	9	0	0	12	24	25
	2.75	0	0	0	0	0	0	0	6	0	0	0	0	0	0	0	0	0	0	0	8.00001	0	0	0	5.00001	8.00001	0	0	0	0	0	0	0	0	0	0	11	0	0	0	0	23	0	11	0	0	24	26	26
	3.25	0	0	0	0	0	0	0	9	0	0	0	0	0	6	0	0	20	0	0	9	0	0	17	0	20	0	0	0	0	0	15	6.99999	0	0	0	12	6.99999	12	0	16	25	9.99999	19	8.00001	0	9.99999	25	30
	3.75	13	0	9.99999	13	0	0	0	16	0	0	0	0	0	5.00001	0	0	9	0	0	15	0	0	20	0	30	0	0	0	0	0	17	17	0	9.99999	9.99999	15	0	22	0	8.00001	29	17	21	3	6.99999	25	24	30
	4.25	0	9	9	3	0	0	0	27	0	3.99999	0	6	0	14	0	0	8.00001	0	0	20	5.00001	0	9	2.00001	26	0	0.99999	0	0	18	18	14	0	14	0	22	3.99999	19	0	9	26	18	19	3.99999	22	19	30	30
	4.75	21	6	6.99999	14	0	11	5.00001	24	9	11	6.99999	9.99999	0	17	14	3	29	0	0	29	9	5.00001	19	9.99999	25	0	25	0	0	28	28	29	0	30	5.00001	17	5.00001	27	0	30	29	12	18	9	0	24	15	30
	5.25	25	14	20	12	11	24	24	30	16	6	0	12	6	13	0	11	21	11	0	25	17	12	23	17	21	6.99999	24	0	0	30	29	30	8.00001	28	17	19	5.00001	30	14	30	29	6.99999	29	21	3.99999	26	30	30
	5.75	26	14	25	18	20	13	28	28	20	26	17	22	6	30	15	26	30	3.99999	5.00001	30	13	14	27	20	28	6	23	0	8.00001	30	26	30	26	26	18	29	20	30	24	30	30	28	19	30	17	26	30	30
	6.25	29	26	21	23	15	25	24	30	25	26	26	30	26	30	20	18	30	18	0	30	24	0	27	17	25	16	30	0	11	30	27	30	24	30	30	30	0.99999	30	26	30	30	27	17	22	2.00001	24	16	30
	6.75	30	27	30	24	20	29	30	24	28	30	19	30	30	27	12	29	30	24	9.99999	30	22	16	23	21	30	26	30	9.99999	16	30	25	30	30	30	30	23	13	30	28	30	30	24	28	28	3.99999	28	28	30
	7.25	30	23	15	19	16	30	30	27	18	28	21	30	30	26	19	30	30	25	14	30	28	30	30	30	30	30	30	5.00001	21	30	26	25	30	30	25	21	22	30	26	30	30	30	21	30	0	29	27	30
	7.75	29	22	24	21	12	29	30	27	29	27	19	30	30	30	14	30	24	21	6	30	28	17	30	27	29	26	30	0	30	30	30	30	27	30	28	20	28	30	20	30	30	28	20	30	28	28	30	30
	8.25	30	0.99999	19	27	20	24	30	30	29	22	23	30	27	30	9	28	29	27	15	30	18	19	23	9	19	26	30	0	30	30	30	30	30	30	26	30	30	30	26	30	27	30	29	30	12	26	27	30
	8.75	30	2.00001	19	30	27	27	30	30	30	27	6.99999	20	29	27	8.00001	29	30	27	14	28	2.00001	3.99999	21	6	21	27	27	0	27	30	25	29	29	30	24	24	26	16	29	30	30	30	24	30	19	26	30	30
	9.25	30	6	20	22	16	23	30	19	30	24	0	6.99999	30	9.99999	0	28	30	13	12	24	5.00001	0.99999	17	9.99999	28	30	25	8.00001	15	30	30	27	24	29	26	30	30	30	25	30	30	30	23	30	6	24	30	30
	9.75	30	0	15	16	19	30	20	16	28	18	9.99999	0	27	0	0	21	30	0	5.00001	29	0	0	0	2.00001	15	23	22	0	6	30	17	27	13	25	24	30	30	30	28	30	30	28	28	29	6.99999	27	29	30
	10.25	28	0	9.99999	0	0	8.00001	0	9.99999	23	0	9.99999	0	6	8.00001	9	28	23	5.00001	0	12	0	5.00001	6.99999	5.00001	14	26	12	0	0	30	0	24	0	27	24	28	30	26	21	30	30	22	24	30	0	20	27	30
	10.75	9	0	0	0	5.00001	3	0	0.99999	0.99999	5.00001	0	0	5.00001	0	0	11	14	0	0	0	0	0	9	0	0	0	8.00001	0	0	15	0	0	5.00001	6.99999	24	29	30	26	3.99999	23	30	29	3.99999	13	0	6	29	30
	11.25	0	0	0	0	0	3	0	0	0	0	0	0	0	0	0	5.00001	5.00001	0	0	0	0	0	0	0	0	0	0	0	0	0	0	0	0	0	23	30	30	5.00001	0	6.99999	29	25	0	16	0	17	24	29
	11.75	0	0	0	0	0	0	0	0	0	0	0	0	0	0	0	0	0	0	0	0	0	0	0	0	0	0	0	0	0	0	0	0	0	0	0	29	30	0	0	0	6	11	0	9	0	26	20	8.00001
	12.25	13	5.00001	0	16	8.00001	15	13	6	11	0	14	9.99999	9.99999	8.00001	0	5.00001	13	9.99999	0	0	0	6.99999	0	6.99999	3	9	6.99999	6	9	0.99999	6	21	13	20	13	15	20	0	11	15	11	9	0	8.00001	17	17	13	11
	12.75	11	6	0	8.00001	15	19	26	30	30	0	28	6	30	18	2.00001	15	30	30	5.00001	24	8.00001	0	26	18	16	23	30	12	0	16	8.00001	30	15	25	13	17	29	14	15	30	16	6.99999	5.00001	21	28	23	9.99999	30
	13.25	30	3.99999	15	17	20	25	16	30	30	0	30	15	30	19	21	18	18	30	24	22	11	24	30	19	6.99999	30	30	15	5.00001	28	25	30	9	25	13	16	30	20	25	30	29	17	17	21	20	27	29	30
	13.75	26	20	24	22	24	20	19	30	26	21	28	26	30	27	14	17	19	30	12	30	18	21	29	22	30	23	30	15	5.00001	30	18	30	30	28	8.00001	28	28	28	24	30	30	20	30	28	25	23	30	30
	14.25	25	23	22	26	28	29	22	30	12	18	29	20	30	27	19	27	27	30	21	30	24	26	12	22	30	28	30	23	23	20	20	30	19	20	0.99999	30	28	27	24	30	27	19	28	24	18	30	24	30
	14.75	29	21	30	25	17	28	27	30	14	16	30	28	30	28	24	23	11	30	24	30	8.00001	25	20	23	30	30	30	20	23	18	23	30	19	29	23	30	30	30	26	30	23	15	15	29	25	22	15	26
	15.25	30	18	18	23	22	16	24	29	27	11	30	13	29	23	25	22	19	30	20	30	18	26	18	2.00001	28	21	30	17	28	17	6.99999	30	22	24	25	30	29	30	28	29	13	13	30	30	30	28	20	30
	15.75	14	20	24	25	29	22	19	30	26	19	25	28	30	26	23	17	20	30	22	30	15	23	19	23	26	21	30	17	20	25	24	26	29	30	29	28	30	23	13	30	27	16	17	30	30	29	25	30
	16.25	20	24	9	24	25	23	20	30	9	23	29	27	21	21	29	28	15	30	30	30	17	24	12	25	25	30	30	13	23	29	22	28	24	21	27	29	29	26	20	30	27	18	14	30	30	25	27	30
	16.75	5.00001	29	30	18	26	9	25	30	16	15	24	27	24	14	29	25	27	30	29	30	17	9	19	24	30	23	30	28	23	25	22	30	29	25	25	29	30	28	19	30	28	11	20	30	20	15	30	30
	17.25	24	29	27	30	22	18	28	30	28	21	29	19	23	6.99999	30	26	27	15	17	30	19	19	24	13	30	12	30	26	21	28	24	30	21	27	27	26	29	28	30	30	24	14	23	30	22	6.99999	16	30
	17.75	15	16	17	25	16	17	24	29	15	22	30	14	25	30	30	28	19	21	21	24	23	26	18	23	29	9	30	9.99999	24	12	20	22	23	22	26	27	29	29	24	30	28	17	28	25	25	11	30	29
	18.25	30	18	30	26	18	22	27	30	27	28	28	21	22	17	24	27	29	18	25	21	18	18	16	26	30	24	30	20	27	20	30	24	21	27	24	30	24	30	30	30	28	21	30	30	15	18	29	30
	18.75	27	15	24	26	27	9	30	17	25	19	27	26	30	30	24	24	27	22	25	28	25	0	18	0	30	19	30	18	21	30	25	30	30	27	28	30	30	26	30	30	29	19	29	26	25	23	29	26
	19.25	22	25	30	18	22	20	28	13	30	22	26	30	30	28	22	17	30	16	22	25	30	26	19	29	30	11	30	19	27	30	30	30	30	30	29	28	27	30	30	30	28	23	30	30	27	25	30	30
	19.75	27	28	30	29	16	25	28	17	25	22	28	30	21	30	30	26	30	25	20	28	25	25	8.00001	30	30	27	30	0	9	30	30	29	30	24	19	27	30	28	24	30	29	16	9	30	29	30	30	15
	20.25	30	17	30	24	16	21	27	21	29	21	25	23	30	27	20	23	17	23	27	30	27	30	25	30	30	13	23	25	22	30	23	14	30	25	28	25	30	30	27	30	27	18	19	27	19	25	30	18
	20.75	27	16	30	27	30	15	24	28	20	9	28	30	26	30	30	30	18	26	30	24	25	13	22	30	28	28	29	12	14	30	30	30	16	26	30	27	30	30	30	21	18	24	18	30	15	27	27	9
	21.25	23	21	14	26	22	26	30	17	21	30	30	30	30	30	23	24	26	29	25	24	29	24	27	18	23	29	30	18	30	30	19	30	28	22	28	28	30	25	30	30	22	28	3	30	0	30	30	19
	21.75	30	6.99999	30	29	22	22	21	29	29	17	30	16	11	30	28	25	15	30	30	21	21	26	18	15	30	16	30	0	19	30	30	30	27	9	25	29	30	24	21	22	24	22	16	30	6	27	30	30
	22.25	17	22	14	14	30	24	30	30	30	23	29	30	13	30	30	30	14	22	24	19	5.00001	16	20	30	30	25	27	8.00001	30	30	16	30	21	30	29	30	30	21	24	30	30	9.99999	30	30	30	24	30	26
	22.75	5.00001	30	8.00001	18	25	21	30	30	26	9.99999	30	30	30	11	21	28	9	21	29	28	12	21	26	18	30	29	6	9	28	30	18	24	30	11	21	29	29	28	24	18	20	28	14	28	27	0	30	30
	23.25	11	9.99999	14	0	19	18	6.99999	3.99999	16	23	5.00001	6.99999	11	28	27	0	14	13	11	0	9.99999	6.99999	0	18	21	20	0	9.99999	0	20	11	28	27	18	28	29	30	29	28	5.00001	30	30	13	19	6	12	25	16
	23.75	6	0	8.00001	0	30	0	5.00001	0	3.99999	6.99999	0	0	0	30	0	0	15	18	9.99999	0	0	9.99999	6.99999	0	16	9.99999	0	6.99999	0	15	9	16	23	11	9.99999	30	29	30	27	0	13	16	24	23	18	12	19	29
	Bin (hours)	upd3-i GD/ +																									EEC>upd3-i GD
	0.25	5.00001	29	0	0	29	24	0	12	27	30	26	0	0	5.00001	28	5.00001	0	0	22	29	9	30	9	0	0	5	21	26	0	24	0	0	16	29	20	30	9	15	24	0	7	23	25	14	6	30	30	0
	0.75	0	15	0	0	21	29	0	0	24	30	9.99999	0	0	0	6.99999	0	0	0	3	28	0	20	0	0	0	0	9	26	0	29	0	0	0	15	26	30	2	30	30	0	0	28	30	21	0	28	29	0
	1.25	0	6.99999	0	0	30	6	0	0	28	23	0	0	0	0	9.99999	0	0	0	0	30	0	0	0	0	0	0	9	10	0	20	0	0	0	17	25	24	0	27	25	0	0	25	25	0	0	20	30	0
	1.75	0	0	0	0	22	0	0	0	30	16	0	0	0	0	0	0	0	0	0	27	0	0	0	0	0	0	11	13	0	11	0	5	0	28	26	30	0	28	23	0	0	29	30	6	0	26	30	0
	2.25	0	0	0	0	27	0	0	0	29	15	0	0	0	0	0	0	0	0	0	29	0	0	0	0	0	2	23	3	5	7	0	1	0	19	23	26	22	29	25	0	0	30	29	5	10	29	21	2
	2.75	0	0	0	0	28	0	0	0	25	23	0	0	0	0	0	0	0	0	0	30	9.99999	0	0	0	5.00001	5	30	14	5	19	5	0	7	19	17	30	21	30	25	0	0	24	30	14	19	20	29	10
	3.25	0	0	0	0	29	0	9	0	28	12	5.00001	0	2.00001	0	0	0	0	0	0	30	0	0	0	0	0	5	29	19	16	24	20	7	15	22	24	23	27	28	24	0	0	29	23	8	17	24	28	1
	3.75	0	0	0	0	28	0	11	0	30	27	0	0	29	0	0	0	0	0	0	30	0	0	0	0	0	7	30	26	18	24	23	20	19	29	26	30	27	30	30	0	13	30	30	15	26	18	30	26
	4.25	6.99999	0	0	0	30	0	24	8.00001	30	22	0	0	18	0	0	0	0	6	0	30	6	0	12	0	5.00001	17	30	28	26	27	30	20	29	28	23	30	22	29	29	10	23	30	22	22	30	30	26	29
	4.75	15	5.00001	8.00001	0	30	0	18	27	30	27	14	0	30	22	0	0	0	0	0	30	0	0	30	0	8.00001	20	30	24	29	28	29	26	29	21	24	30	24	26	22	25	29	30	26	22	30	11	26	22
	5.25	26	0	30	0	30	0	14	30	28	21	0	0	30	30	17	0	0	0	5.00001	30	13	19	28	0	26	22	30	29	30	25	30	21	29	24	28	30	30	24	22	29	29	30	28	21	30	27	30	19
	5.75	30	0	30	6	30	8.00001	30	30	30	20	18	8.00001	30	30	25	6.99999	0	0	11	26	30	24	30	13	3.99999	29	30	17	30	22	30	30	30	30	30	30	24	30	28	29	30	30	24	27	30	14	29	29
	6.25	26	20	30	5.00001	30	26	30	30	30	24	25	0	30	25	28	0	0	0	5.00001	30	30	30	30	5.00001	13	29	30	30	30	30	30	29	30	9	26	30	22	29	19	30	30	30	28	23	30	30	24	28
	6.75	24	28	30	0	30	16	30	30	30	23	27	5.00001	30	27	26	20	0	0	9.99999	30	30	30	30	30	23	30	30	21	30	30	29	30	30	30	11	30	25	29	23	30	30	28	30	26	30	29	30	26
	7.25	30	27	27	0	25	9	30	30	30	30	30	15	30	30	29	26	19	3.99999	17	30	29	30	30	30	5.00001	29	30	28	30	30	30	28	30	30	24	30	30	30	27	30	30	30	30	29	30	30	30	30
	7.75	27	30	23	0	17	27	30	30	30	30	30	0	30	30	29	9	0	14	18	30	28	30	30	9	30	28	30	30	30	30	30	30	30	24	30	29	26	30	30	30	30	30	14	25	30	30	30	29
	8.25	29	24	29	0	20	23	30	30	30	30	30	0	30	30	24	29	0	0	15	30	27	30	30	0	2.00001	27	30	21	29	30	30	29	29	25	26	28	30	23	28	30	29	30	27	30	30	29	30	25
	8.75	30	27	28	8.00001	24	18	30	30	28	30	30	13	30	29	29	6	14	6	14	29	29	30	30	0	23	28	30	30	30	30	30	29	30	30	30	17	30	29	29	29	30	28	29	30	30	26	23	27
	9.25	22	27	24	0	30	0.99999	30	30	28	22	30	13	29	30	22	0	0	0	17	22	27	30	29	0	16	12	30	22	30	27	29	24	27	29	29	18	20	30	29	29	30	19	30	29	30	20	30	30
	9.75	21	13	30	0	13	17	28	30	27	9.99999	14	6.99999	12	30	14	0	0	0	19	24	17	30	21	0	11	0	30	29	30	21	30	24	17	27	28	21	29	30	30	30	22	24	28	27	30	0	30	26
	10.25	3.99999	0	30	0	0	0	28	29	27	6	0	0	0	27	0	0	0	0	9.99999	30	0	19	9.99999	0	3	0	25	29	22	23	26	30	1	28	30	0	30	26	30	27	0	0	7	24	30	7	16	29
	10.75	0	0	6.99999	0	0	0	30	22	17	0	0	5.00001	0	25	0	0	0	0	0	22	0	9	0	0	0	0	1	23	0	0	18	29	0	21	22	0	29	26	29	30	0	1	0	24	11	0	17	30
	11.25	0	0	0	0	0	0	21	0	0	0	0	6.99999	0	0	0	0	0	0	0	14	0	0	0	0	5.00001	0	0	30	0	0	0	30	0	23	9	0	7	21	15	30	0	7	0	30	0	0	6	25
	11.75	0	0	5.00001	0	0	0	0	0	0	0	0	6.99999	0	0	0	0	0	0	0	6	0	0	0	0	8.00001	0	0	26	0	0	0	29	0	0	19	0	0	0	5	30	0	0	0	15	0	0	0	24
	12.25	2.00001	0	5.00001	14	13	18	0	0	0	0	5.00001	9.99999	6.99999	23	18	14	0	9	6	0	15	9	0	6.99999	19	9	5	14	7	16	3	4	18	19	21	2	14	0	11	5	11	16	24	5	15	24	21	6
	12.75	22	25	30	26	6	30	5.00001	3.99999	0	17	9	30	30	25	25	26	30	27	21	0	30	28	14	17	30	29	0	26	15	30	13	0	23	30	30	23	29	22	30	0	30	30	30	0	30	27	30	8
	13.25	26	22	30	24	9.99999	29	30	30	19	30	30	30	30	30	24	23	30	17	30	8.00001	24	30	25	30	28	29	23	23	21	26	18	0	30	30	30	30	30	30	30	0	28	30	30	0	30	30	30	30
	13.75	23	23	30	27	29	14	30	30	30	30	30	30	30	29	30	21	24	27	23	30	23	30	30	26	8.00001	30	27	24	17	0	29	15	30	27	30	30	30	30	30	0	30	30	30	14	30	30	29	30
	14.25	30	30	30	27	30	18	30	30	26	30	25	28	30	30	25	19	26	23	30	30	30	28	26	30	28	29	11	30	14	11	30	30	30	28	29	30	30	30	30	0	30	30	29	19	30	30	30	27
	14.75	30	20	30	28	19	27	30	30	26	30	21	29	28	30	26	27	14	27	25	30	22	20	26	30	30	30	28	28	14	24	30	30	30	30	30	30	30	30	30	5	27	29	30	30	30	30	25	30
	15.25	25	30	30	29	30	20	30	30	16	30	29	30	27	20	14	25	26	30	29	30	30	27	28	24	30	30	24	30	26	30	29	27	30	30	24	30	29	30	30	17	30	29	30	30	28	30	30	29
	15.75	26	24	30	30	30	27	30	30	20	18	21	30	28	26	20	17	19	29	23	30	30	25	30	30	30	30	13	30	30	30	30	30	30	30	30	30	30	30	28	27	30	27	30	30	30	30	30	25
	16.25	18	23	30	29	19	30	22	30	12	17	30	25	25	28	16	21	29	28	25	30	16	29	30	25	0	30	24	26	30	27	30	30	29	29	30	30	19	30	30	8	30	27	30	30	22	30	23	30
	16.75	30	30	30	29	14	21	30	30	26	18	20	30	30	30	26	29	24	28	26	30	28	22	30	30	14	30	16	30	28	30	30	30	30	27	30	30	25	30	28	5	30	30	24	23	30	30	30	30
	17.25	24	20	30	30	30	27	25	30	18	5.00001	29	23	30	30	18	29	9	23	27	30	20	24	25	30	30	28	23	27	30	30	30	30	30	29	26	30	18	30	29	14	30	27	30	30	30	30	30	21
	17.75	0	30	30	29	24	30	30	30	25	28	30	30	30	30	30	27	22	25	24	30	30	30	28	30	30	23	30	23	19	30	30	26	30	30	30	23	24	30	30	28	30	29	30	21	30	30	30	30
	18.25	0	30	30	30	30	30	28	30	5.00001	23	25	25	20	30	22	30	23	23	30	30	25	29	30	22	30	30	30	30	30	30	30	30	30	30	30	30	22	30	30	24	26	30	30	20	30	30	30	30
	18.75	19	25	30	30	24	30	30	30	9	30	30	30	28	30	28	30	9.99999	30	27	30	21	29	30	30	18	26	30	30	30	30	30	30	30	30	22	25	21	30	28	0	30	25	30	22	30	29	30	30
	19.25	30	22	30	29	27	30	30	30	27	21	26	30	28	30	16	28	26	30	30	30	30	24	15	28	18	30	30	30	25	30	28	30	28	30	30	28	28	30	29	0	30	30	30	30	30	30	27	30
	19.75	30	30	30	25	23	17	30	30	25	30	30	30	30	29	21	27	25	30	30	30	26	26	30	30	30	30	28	30	30	27	30	30	30	30	30	25	12	30	27	0	30	27	30	30	30	30	30	29
	20.25	30	22	30	25	29	27	30	30	28	30	30	30	30	29	26	23	0	21	30	30	26	24	30	25	30	30	30	30	29	30	28	30	30	30	30	30	30	30	30	10	30	30	28	29	29	24	30	19
	20.75	30	30	29	30	30	30	29	30	30	30	25	30	24	30	19	27	2.00001	30	30	30	25	30	30	30	30	30	30	25	24	29	29	28	30	30	30	30	30	30	30	18	30	30	30	25	29	21	30	30
	21.25	28	30	30	30	18	30	28	30	30	29	30	30	30	30	15	30	30	27	24	30	30	30	30	30	30	30	29	30	29	30	30	30	30	30	28	30	14	26	25	10	30	30	30	30	30	22	26	30
	21.75	29	22	30	22	30	22	24	30	30	30	30	24	30	27	26	19	18	29	2.00001	30	30	30	21	20	30	30	28	24	30	5	30	30	30	30	30	29	23	27	30	6	28	26	30	23	30	27	30	30
	22.25	20	30	30	29	22	22	0	30	30	27	30	15	16	30	29	30	30	30	27	30	18	30	11	26	30	21	28	30	25	12	30	30	30	28	30	30	30	30	30	0	29	26	30	30	30	26	30	29
	22.75	28	21	30	30	30	30	16	28	30	30	30	18	13	27	21	26	12	27	30	30	30	30	30	29	8.00001	29	30	25	22	30	30	30	30	24	30	30	23	30	30	15	28	30	30	30	26	27	30	30
	23.25	17	15	15	25	30	24	0	3	29	25	14	11	30	25	14	24	0	20	24	30	24	30	18	27	18	28	30	30	30	29	30	30	29	22	28	30	30	30	30	5	26	28	29	30	19	21	28	25
	23.75	0	3	0	19	6	30	0	0	11	18	0	0	24	29	5.00001	21	0	0	9	30	30	21	0	17	9.99999	30	30	30	25	27	15	30	29	30	30	30	30	21	30	7	21	30	30	30	14	16	30	29
	g: Day sleep								h: Night sleep								m: Motion bout length								n: Motion bout activity
	upd2-i SH/ +	EEC>upd2-i SH	upd3-i KK/ +	EEC>upd3-i KK	upd3-i GD/ +	EEC>upd3-i GD			upd2-i SH/ +	EEC>upd2-i SH	upd3-i KK/ +	EEC>upd3-i KK	upd3-i GD/ +	EEC>upd3-i GD			upd2-i SH/ +	EEC>upd2-i SH	upd3-i KK/ +	EEC>upd3-i KK	upd3-i GD/ +	EEC>upd3-i GD			upd2-i SH/ +	EEC>upd2-i SH	upd3-i KK/ +	EEC>upd3-i KK	upd3-i GD/ +	EEC>upd3-i GD
	255	411	150	376	296	295			490	625	424	556	517	672			45.0909	28.3333	53.5455	32.1818	41.0909	23.4211			1.16306	1.03207	1.06122	1.8393	0.820047	1.0876
	282	315	244	348	252	548			544	487	478	529	557	578			30.0667	17.84	34.3125	15.48	38.6154	18.6			1.79459	0.909133	1.28392	1.96334	1.03642	2.57037
	306	357	242	489	331	554			543	680	496	649	649	657			24.8333	23.625	30.6875	10.0435	41.4	5.53333			1.70869	0.929412	1.26775	1.42956	1.31383	1.51364
	292	584	181	369	19	420			586	688	529	692	646	581			37.0833	8.16667	39.4286	23.4	13.7333	24.8462			0.902693	1.87202	1.01415	1.02691	0.958112	1.01108
	261	487	279	430	523	511			518	624	464	615	553	594			19.16	7.26471	28.5	20.3125	47.9091	10.619			1.13391	2.04909	1.2331	1.1161	1.89177	1.49223
	309	471	281	282	204	449			394	619	550	585	614	642			21.0833	16.8889	57	21.7619	35.2	22.9231			1.1135	2.56147	1.21386	1.85496	1.34489	2.68605
	398	443	354	423	423	471			534	620	570	620	537	612			14.7391	11.24	22.7059	44.5714	94.5	14.6471			1.21743	0.868515	1.49514	1.23768	1.45508	1.53897
	379	448	286	625	398	398			517	555	527	581	605	697			46.125	38.8889	26.6471	6	9.61111	27.8333			1.0523	1.2346	1.01126	1.69732	1.33962	1.20424
	231	489	254	433	616	557			476	664	397	431	502	684			36.5333	11.2273	32.7059	11.8461	13.9048	6.21429			1.06645	1.34399	1.11228	1.55032	1.51172	1.59897
	224	439	159	395	471	576			587	634	612	463	577	690			36.8571	19.5	48.0833	13.4074	44.7	4.11429			1.05659	1.00125	0.952493	1.27524	1.2161	2.84608
	368	351	227	389	289	546			606	615	506	640	579	666			16.8571	16.913	56.7778	19.6111	66	16.8333			1.19238	0.988457	1.16034	1.31535	1.1896	1.52679
	146	220	252	141	80	486			546	571	566	507	598	602			40.4667	21.5	54.2222	42.2143	95.75	10.8696			1.07466	1.06202	1.32159	1.49665	1.0724	2.00847
	209	580	278	534	360	629			501	597	569	511	628	666			77	5.6	38	4.65	51	6.1			1.33205	1.72357	1.66294	2.34422	0.99369	2.21538
	417	510	120	629	370	601			498	658	525	608	678	686			13.7727	17.9231	59.8182	4.28571	26.1177	4.92857			2.15411	0.898453	1.50422	3.54943	1.30072	1.95772
	322	512	302	608	288	448			607	613	505	614	515	674			18.5217	10.2727	22.7368	18.7143	90.1429	9.94118			1.01518	2.16364	1.1271	2.93792	0.869132	1.45733
	300	450	392	316	102	362			456	669	489	557	593	677			51.6667	11.8333	24.6429	26.4706	28.05	10.0556			1.18173	1.09366	2.0305	1.38619	1.08801	1.76278
	312	475	175	401	33	565			545	604	579	695	429	705			24.7059	18	37.6667	26.9167	9.75	9.32			1.08501	1.01735	1.89512	1.8095	1.165	1.21516
	367	362	81	277	30	545			570	654	503	569	590	563			19.3684	24.9333	62	24.6111	40.9091	11.8095			0.938919	0.725769	1.26577	1.49308	1.32501	1.02598
	312	356	389	504	166	487			581	609	558	630	583	662			60.7143	22.3333	30.4167	21.2727	63.3333	7.8125			1.21076	0.681546	1.50756	0.990845	2.13701	1.76248
	442	518	171	557	646	479			566	643	405	704	639	655			40.75	9.86364	38.6667	20.375	59	14.7222			1.67583	1.09851	1.45928	0.704974	1.0831	1.40502
	393	412	123	677	285	478			528	670	446	675	614	690			37.6	27.8333	51.5833	2.38889	45.3333	11.125			1.17253	1.16229	1.47796	3.15833	1.45591	1.24858
	399	437	316	315	361	604			541	622	434	683	635	638			24.2	24	25.7647	50.625		5.68182			2.57151	0.941706	1.73067	1.32989	1.75322	1.73272
	214	279	181	624	349	467			570	618	465	509	567	688			34.6	19.0417	35.125	4.17391		7.83333			1.27065	0.796187	1.09647	3.17623	1.03944	2.17787
	297		387	584	87	471			553		612	670	623	683			26.8823		18	5.72		11.2174			1.02614		1.40184	1.96636	1.30145	2.17774
	249		243		187	605			514		511		559	657			73.5714		45			6.41176			1.15783		0.978209			1.03461
	418		317			541			593		602			673			18.1111		35.5			7.61905			1.01005		1.35091			2.24545
	321		23			492			489		348			690			29.1333		82.2857			15.0588			1.84651		1.24245			1.54165
	439		164			617			620		431			704			18.1177		22						1.03501		1.25885			1.77369
	296		391			446			595		574			697			18.5		26.8462						1.13942		1.38187			1.71758
	334		390			577			559		490			583			19		40.8333						1.16587		1.38907
	387		379			488			500		652						44.875								1.44359		1.03828
			246								567																1.96384
	o: Total feeding time								p: Food intake				q: TAG levels				r: Relative expression
	EEC>				EEC>				EEC>				EEC>				AstC Gut>
	w1118	upd2-i SH			w1118	upd3-i GD			w1118	upd3 OE			w1118	upd3-i KK			w1118	upd3-i KK
	429.8	470.2			714.8	520.2			58.8	24.9			0.948307	0.950873			0.969	0.505
	578.6	498.6			533.4	323.4			25.4	39.1			0.973975	0.91779			0.522	0.17
	115.4	607.8			614.8	1143.8			24	35.9			0.969412	1.00906			0.459	0.369
	529.6	523.4			476.4	845.6			24.8	44.6			1.13198	1.07494			1.564	0.835
	282.8	462			877	548			27.4	40.2			0.835365	0.996506			1.486	0.17
	675.6	582.4			414	677.4			37.4	34.2			0.949447
	560.6	413			385	1150.6			36.7	26.3			1.10973
	328.8	770.2			792.8	400.2			35.6	46.3			1.08178
	568.6	553.6			310.6	899.2			41.4	31.6
	565.4	689.6			404.6				57.5	34.1
	447.4	623.6			484.2				27.2	33.3
	319.6				461				32.4	27.5
	138.8				424				29.3	62
	438.4				623				47.4
	199.8				819.4				27.2
	275				868				24.9
	670.6				687.6				19.3
	468.6				335				28
	636.4				432.4				35.1
	652				400				29.2
	414.8				635.2
	402				525.4
	621.4				420.8
					353.2
					640.6
					210.2
					638.2
					395.4
					653.2
					564.8
					587.6
					391.2
					269
					786.2
					617.6
					658
[truncated: 176 more columns]

## Sheet: Figure 2
	Figure 2
	a: Day sleep						Night sleep
	R57C10>		repo>				R57C10>		repo>
	w1118	dome-i KK	w1118	dome-i KK			w1118	dome-i KK	w1118	dome-i KK
	374	648	307	454			399	577	522	637
	429	302	585	627			564	438	571	566
	423	321	501	533			354	452	532	586
	361	606	400	621			262	449	562	636
	354	366	382	508			501	342	620	579
	404	489	138	587			402	325	445	656
	450	582	366	619			504	628	617	600
	423	630	430	601			494	470	559	590
	454	341	365	480			425	422	600	590
	363	470	373	560			460	453	617	608
	327	422	590	565			371	332	614	628
	467	322	377	564			603	360	542	641
	292	468	530	599			437	432	553	625
	410	348	346	531			432	358	600	645
	475	451	400	551			275	551	575	611
	443	437	398	453			497	480	610	599
	472	466	480	588			645	405	543	608
	309	395	443	529			455	421	546	612
	398	327	540	529			458	498	559	612
	372	525	434	541			465	489	537	644
	222	451	391	465			573	426	623	620
	507	556	382	605			611	530	543	619
	494	250	488	542			570	396	625	615
	395	516	398	553			558	365	586	598
	494	533	42	555			444	542	588	601
	361		529	574			395		572	644
	437		385				600		625	643
	560		294				535		611	648
	400		388				393		604	657
			450				318		565	644
									503	632
									603	616
	b: Sleep patteren
	Bin (hours)	repo>																																	repo>dome-i GD
	0.25	21	18	27	6.99999	14	13	0	28	28	6.99999	30	0.99999	30	22	24	22	21	6	5.00001	17	24	29	8.00001	23	16	0	16	22	14	22	11	18	28	0	0	6	0	0	0	0	0	0	0	0	0	0	0	0
	0.75	6	8.00001	8.00001	6	0	0	0	28	15	0	23	25	28	9	25	12	15	0	0	17	0	13	5.00001	0	5.00001	0	0	5.00001	19	16	0	17	25	0	0	0	0	2	0	0	0	5	0	0	0	5	0	2
	1.25	5.00001	8.00001	0	5.00001	0	6	0	27	0	0	30	19	26	11	17	13	9	0	0	0.99999	8.00001	0	11	0	0	0	0	0	29	18	5.00001	6	26	0	0	13	0	3	0	0	0	0	0	0	0	13	0	18
	1.75	12	0	6	11	0	0.99999	5.00001	24	0	0	25	19	26	13	8.00001	8.00001	0	0	0	0	0	0	0	0	0	0	0	0	18	24	0.99999	11	29	0	6	0	0	3	0	5	5	5	0	7	0	8	0	10
	2.25	9.99999	5.00001	0	8.00001	0	12	5.00001	22	0	0	24	21	29	0	0	0	0	0	0	3	17	6.99999	6	0	0	3	0	0	14	15	9.99999	3	29	0	11	2	0	4	10	5	8	9	7	14	15	15	7	23
	2.75	5.00001	5.00001	5.00001	27	0	14	5.00001	22	6.99999	0	30	27	25	5.00001	9	11	0	8.00001	19	3	9	0	2.00001	9.99999	0	2.00001	0	8.00001	14	29	6.99999	0	25	6	12	9	0	6	5	0	11	5	10	2	12	16	1	14
	3.25	0	0	5.00001	20	0	9	0	23	0	11	24	22	29	16	0	9.99999	0	0	16	0	3	0	13	5.00001	0	0	0	5.00001	24	26	12	6	27	5	15	0	0	6	0	0	0	0	7	10	19	14	6	18
	3.75	9.99999	5.00001	8.00001	16	0	8.00001	9.99999	25	8.00001	0	30	30	27	20	9.99999	15	9	0	20	9.99999	8.00001	0	15	6	0	0	0	11	30	21	12	5.00001	27	0	18	6	6	13	7	12	7	0	22	8	23	20	1	11
	4.25	11	0	13	14	0	18	5.00001	28	0	5.00001	19	22	30	0.99999	11	19	11	0	5.00001	6	5.00001	5.00001	5.00001	16	0	5.00001	6	9	21	26	15	14	23	0	28	17	17	14	11	5	29	10	14	15	24	20	12	25
	4.75	13	6.99999	13	29	21	14	22	18	0	0	30	20	28	19	28	21	3.99999	0	2.00001	6.99999	0	9.99999	8.00001	0	6	20	0	9	22	30	28	26	28	5	27	20	24	9	16	11	30	10	30	17	25	29	19	20
	5.25	2.00001	0	21	29	29	21	11	16	14	8.00001	25	27	21	23	12	27	16	6.99999	16	12	8.00001	9	16	0	0	25	6.99999	0	27	30	30	18	22	23	30	30	30	24	23	0	25	13	17	9	29	29	15	25
	5.75	23	12	0	30	29	6.99999	29	30	26	9	30	30	28	12	9.99999	29	9.99999	18	28	5.00001	5.00001	6	19	9	0	27	3.99999	0	25	30	30	28	24	30	30	30	30	30	30	11	29	28	25	23	26	23	18	25
	6.25	21	25	24	30	28	24	27	15	21	6	22	23	28	19	11	26	27	17	19	18	5.00001	8.00001	14	17	0	18	23	5.00001	30	30	29	28	30	30	30	30	30	30	29	10	30	30	28	29	30	30	29	28
	6.75	24	28	17	30	28	23	27	30	20	3.99999	29	28	23	19	21	29	29	15	27	17	18	0	23	16	8.00001	28	6.99999	12	29	30	28	30	28	30	30	30	30	27	30	10	24	30	30	28	30	30	30	29
	7.25	19	30	20	29	29	16	30	30	22	12	30	15	17	24	18	30	19	26	25	17	15	0	29	17	0	30	5.00001	15	27	30	26	24	30	30	30	30	30	30	30	20	21	30	30	29	29	30	29	29
	7.75	20	28	29	30	30	30	30	30	30	9.99999	22	30	24	28	13	15	29	24	30	16	24	9.99999	23	21	6.99999	22	0	20	30	30	30	23	30	29	30	30	30	30	30	12	28	30	30	30	12	30	30	27
	8.25	30	30	30	30	30	27	26	30	21	0	30	30	25	28	30	28	30	27	30	3.99999	16	16	0	24	3.99999	9.99999	8.00001	24	29	30	30	26	30	20	30	30	30	30	30	29	21	30	30	28	27	30	30	25
	8.75	18	29	30	30	18	21	26	30	30	18	30	30	30	28	30	28	30	22	30	0	24	3.99999	0	26	0	25	5.00001	19	28	30	30	30	22	29	30	30	29	30	30	25	30	30	30	26	30	27	29	30
	9.25	25	22	30	30	16	19	28	30	2.00001	9.99999	30	26	30	22	30	19	30	30	30	20	26	0	9.99999	24	8.00001	3	9	29	29	30	25	30	29	27	30	30	30	30	29	29	25	30	30	29	29	30	30	30
	9.75	17	29	27	28	0	29	23	30	0	3	30	23	30	30	9	29	25	27	30	24	29	0	0	16	13	0	0	20	29	30	28	30	30	26	29	28	30	30	30	29	28	30	30	27	28	30	16	29
	10.25	6.99999	28	29	26	0	30	18	29	0	20	30	29	29	18	27	19	5.00001	30	30	26	18	0	0	12	0	2.00001	0	25	28	30	20	24	21	29	30	15	6	30	30	29	19	30	30	18	28	27	25	29
	10.75	9	23	30	6	0	30	0	20	0	5.00001	30	30	29	3.99999	23	30	6.99999	24	30	2.00001	30	0	0	3	0	5.00001	5.00001	14	25	27	0	29	28	29	10	0	0	30	30	17	14	30	30	28	25	27	8	28
	11.25	0	25	24	0	0	30	0	21	0	17	30	19	26	18	9	17	0	16	5.00001	0	20	0	0	0	6.99999	0	0	21	6.99999	26	0	23	22	28	0	0	0	26	30	13	0	30	30	30	30	9	0	29
	11.75	6	6.99999	26	0	0	30	0	0	0	0	24	11	29	6	0	0	0	0	0	0	0	0	6	0	6	6	0	0.99999	0	24	0	15	24	17	0	0	0	20	29	0	0	22	23	20	22	5	0	25
	12.25	0.99999	0	12	0	0	13	6.99999	0	0	6	18	0	25	9	9	0	0	0	0	8.00001	0.99999	9	9	0	2.00001	0	9.99999	5.00001	11	0	0	8.00001	20	0	23	20	1	18	13	3	7	14	0	8	6	8	20	26
	12.75	25	0	0.99999	0	26	0	23	27	28	9	20	18	26	9.99999	21	11	15	0	18	30	11	9.99999	15	6.99999	0	0.99999	0	0	28	27	9.99999	21	3.99999	0	29	28	27	21	12	2	21	24	0	19	7	16	30	19
	13.25	30	0	11	21	29	5.00001	29	23	11	6	24	26	29	18	16	19	24	0	29	19	17	25	16	30	23	26	0	0	19	30	22	27	20	0	29	25	26	28	0	14	21	29	0	14	11	29	30	25
	13.75	26	6.99999	21	26	26	5.00001	30	24	28	30	28	0.99999	30	27	3	24	27	8.00001	29	19	29	15	22	26	24	23	16	0.99999	20	30	24	21	21	15	9	27	27	26	0	17	30	30	0	24	23	25	30	20
	14.25	30	24	30	21	22	28	28	24	28	23	19	30	30	30	21	16	27	19	30	26	21	18	25	19	17	27	9	22	30	30	28	15	30	16	30	23	29	30	17	25	24	29	9	24	29	24	30	29
	14.75	27	30	24	12	30	22	28	20	28	21	30	16	30	25	19	28	29	3.99999	28	18	30	17	22	30	28	23	21	27	18	30	30	26	30	17	30	22	19	29	29	26	30	28	0	27	29	27	30	29
	15.25	30	26	25	21	28	22	30	21	24	24	30	24	30	23	21	28	19	30	30	21	30	23	22	25	22	20	30	30	28	27	21	19	23	26	30	29	24	29	30	25	25	30	0	28	29	28	30	27
	15.75	29	18	14	9	16	29	23	24	20	21	13	6	30	28	28	9.99999	9.99999	28	29	23	30	20	30	27	17	30	28	28	28	29	25	30	23	23	25	26	26	26	30	29	27	30	6	22	26	25	30	22
	16.25	23	21	0.99999	23	30	30	30	24	24	13	28	15	29	28	24	16	24	30	29	30	30	20	29	0	8.00001	27	30	30	26	26	24	23	24	28	30	29	15	28	30	25	22	26	22	28	28	21	30	30
	16.75	30	30	18	26	28	29	27	22	18	22	27	24	30	30	24	29	30	28	29	17	16	20	5.00001	23	12	14	3.99999	25	28	30	30	11	29	26	24	30	27	26	30	28	30	27	28	25	25	22	30	30
	17.25	22	21	30	24	29	30	28	25	9	19	23	17	30	23	19	25	14	30	30	27	30	30	30	30	26	0	30	28	25	30	29	22	30	30	29	25	30	16	30	29	30	30	29	20	29	30	30	30
	17.75	30	23	9	20	24	27	30	26	22	30	30	23	28	30	6.99999	17	24	29	29	30	30	25	20	30	17	26	25	25	21	26	27	9	15	26	29	29	29	29	30	21	24	26	30	20	21	29	30	30
	18.25	30	23	5.00001	8.00001	29	24	29	21	30	17	30	24	30	30	30	29	26	28	29	11	30	23	30	30	30	30	17	29	30	27	28	28	16	29	20	30	29	23	30	28	29	29	30	26	26	25	28	30
	18.75	30	18	26	21	29	20	30	30	30	30	30	8.00001	29	25	25	25	24	24	22	28	30	29	28	14	21	30	27	30	29	30	27	30	17	29	30	29	30	29	30	26	27	28	30	23	30	13	30	30
	19.25	30	27	29	30	24	30	30	29	27	19	30	30	27	28	30	11	30	27	30	18	30	30	30	22	30	30	26	29	30	30	21	25	30	25	30	25	28	30	30	30	25	30	30	30	29	29	30	27
	19.75	30	20	0	17	19	30	28	30	26	24	30	21	30	25	9.99999	22	24	19	26	21	30	30	28	30	30	30	28	30	29	30	30	30	29	28	30	29	30	29	30	30	10	30	22	18	24	27	30	29
	20.25	29	24	29	29	30	23	27	30	27	25	30	18	29	29	30	17	15	30	23	29	30	30	30	30	30	30	29	30	23	28	30	23	29	30	26	7	22	23	30	18	24	30	30	24	17	26	30	26
	20.75	25	21	30	9.99999	30	30	27	30	21	30	30	30	29	30	30	24	30	30	30	16	29	23	30	30	30	30	30	29	30	30	30	29	30	19	30	23	26	30	30	29	23	27	22	28	29	24	30	30
	21.25	30	24	30	30	30	30	28	30	18	30	30	6.99999	30	23	30	16	30	28	26	25	14	21	30	30	30	30	30	29	30	26	25	30	29	20	30	24	30	26	30	23	24	18	23	30	22	24	30	30
	21.75	30	30	18	18	30	25	30	30	21	19	30	30	30	29	30	24	24	30	30	21	30	27	30	30	30	30	19	28	30	26	23	30	15	1	30	27	28	19	30	25	24	30	28	27	30	23	30	24
	22.25	30	28	21	14	20	26	25	26	27	23	30	30	25	25	23	5.00001	19	30	30	29	30	29	30	30	17	30	30	28	30	26	25	30	24	19	30	5	30	28	30	29	29	11	6	28	29	29	30	26
	22.75	24	27	8.00001	14	30	28	30	25	23	21	29	30	29	30	24	12	30	23	30	30	24	19	30	30	28	30	5.00001	30	30	29	25	30	30	23	30	12	25	26	29	22	21	29	20	25	30	30	30	30
	23.25	23	17	21	12	26	6.99999	12	29	21	30	29	21	30	28	24	14	30	16	25	30	25	30	26	30	30	30	18	22	22	30	21	30	30	0	25	20	23	28	24	22	18	29	0	26	22	13	29	30
	23.75	13	30	21	17	22	25	9.99999	23	20	20	30	15	30	25	5.00001	26	9.99999	30	11	18	30	25	30	8.00001	30	27	30	27	8.00001	30	0	13	23	0	21	5	18	19	0	5	3	12	0	18	28	5	20	23
	c: Day sleep						d: Night sleep						e: Motion bout lenght						f: Moution bout activity						g: GFP intensity			h: GFP intensity quantification
	repo>						repo>						repo>						repo>									voila, 10xSTAT GFP>
	w1118	dome-i KK	dome-i TRiP	dome-i GD			w1118	dome-i KK	dome-i TRiP	dome-i GD			w1118	dome-i KK	dome-i TRiP	dome-i GD			w1118	dome-i KK	dome-i TRiP	dome-i GD						w1118	upd2-i SH	upd3-i KK
	314	637	447	393			628	573	571	430			16.1111	2.96429	21.4615	22.2105			0.87996	3.83457	0.970763	2.27745						0.740143	0.41761	0.329907
	372	582	264	456			490	643	639	649			20.0435	6.27273	11.6923	24.3636			1.07147	4.38465	1.29528	0.729941						0.819147	0.497254	0.366955
	422	644	352	386			435	610	504	549			14.1905	2.62069	21.913	30.7273			0.784847	4.09769	0.895441	0.99104						1.15545	0.302963	0.315858
	471	618	545	352			424	668	640	599			16.7368	4.43478	7.58333	66.1667			1.51892	3.00649	1.09613	0.834284						1.12458	0.419142	0.439632
	272	541	475	457			608	590	589	616			43.8182	6.88462	12.5714	18.3333			1.37232	1.80362	1.68994	0.890823						0.87651	0.426244	0.607049
	432	568	601	459			539	654	565	575			10.2857	6.25926	4.95833	26.1			0.797397	1.7347	1.01545	1.07471						1.35425	0.402884	0.398678
	327	552	285	272			619	657	550	531			18.087	5.09091	18.913	25			1.31771	2.86763	0.723929	0.736508						0.954419	0.272381	0.363331
	586	505	610	384			594	538	564	548			6.875	7.67857	8.05263	22.4375			2.13762	1.23216	3.33111	1.70822						0.975498	0.37286	0.488427
	244	464	635	437			531	600	623	627			33.8667	7.4	2.93103	21.7692			0.927273	1.80781	2.27847	0.652759
	145	436	436	483			513	660	477	365			36.9375	10.9231	10.7714	29			0.699475	1.27827	1.1664	1.33901
	657	314	698	427			649	689	634	562			4.64286	26.75	4.16667	13.0417			1.40536	1.53053	4.00303	1.89881
	557	496	595	493			465	680	552	579			7.55556	8.37931	5.07407	10.0435			1.13856	2.52661	2.33227	1.35591
	647	593	601	497			697	681	514	552			2.43333	5.45833	5.125	10.4348			2.93552	1.89739	3.08963	0.960839
	395	526	568	335			609	609	666	697			12	7.16667	4.75	25.9333			0.973157	1.90474	4.11854	3.07551
	375	371	699	529			504	654	698	653			15.9545	31.7273	2.3	5.78788			0.872886	1.01409	1.56	1.376
	457	449	601	492			448	563	653	639			9.36364	13.0769	5.80952	25.3			3.22683	1.44417	1.26655	0.625474
	326	441	563	366			535	499	650	492			22.5789	14.6842	5.64286	47.25			1.1031	1.60025	1.26753	1.18707
	297	490	306	400			522	645	633	582			30.7059	10.5417	29.6429	44.5			1.30296	1.82603	0.701106	2.2158
	397	503	367	409			622	627	707	641			26.0714	7.54839	22	18.5882			0.847329	2.47515	0.816714	0.897894
	225	687	602	466			544	640	674	557			25.65	4.125	4.91667	14.6111			0.882368	5.10833	2.59634	3.81213
	312	642	603	512			608	671	614	708			18.2083	3.25	21.5	16			1.32178	2.39926	1.30423	0.74835
	117	464	410	510			549	653	629	635			62.4	19.7857	22.1429	11.6667			0.645159	1.85074	1.16852	0.68176
	213	462	418	516			598	595	632	611			26.4	11.5417	15.25	12.2778			0.892332	2.08396	1.41793	0.800807
	245	602	664	513			562	642	709	667			23.7727	4.06897	5.09091	15.9231			0.735156	2.35862	3.04695	1.99768
	80	464	653	475			534	661	654	550			53.3333	9.43333	3.44444	23.9167			0.746474	1.56468	1.9791	0.813562
	231	494		553			575	667		709			32.2353	11.3		7.26087			1.04071	0.917377		0.847726
	95	651		516			493	668		519			53.75	2.09091		28.25			1.07884	1.66431		0.883306
	274	659		565			562	708		586			15.4483	3.58824		7.56			0.819724	4.16139		1.64372
	548	413		432			604	570		487			6.58621	13.9545		13.24			2.56159	1.64981		1.20191
	634	376		523			658	675		569			5	20.2778		9.41667			1.5612	2.55141		0.929679
	407	649					555	680					18.15	5.07143					1.12753	1.87291
	464						561						9.48148						2.26832
[truncated: 64 more columns]

## Sheet: Figure 2 - figure supplement 1
	Figure 2, supplement 1
	a: Sleep pattern
	Bin (hours)	dome-i KK/+																															repo>dome-i kk
	0.25	5.00001	0	0	23	0	13	24	0	13	5.00001	13	0	0	12	0	6.99999	0	23	5.00001	0	0	0	0	6.99999	0	27	14	0	8.00001	0	0	23	23	12	15	29	8.00001	29	23	0	16	28	20	6	30	26	27	22
	0.75	0	0	0	15	0	0	12	3.99999	14	9	25	0	0	11	8.00001	6.99999	0	9.99999	0	0	0	0	0	5.00001	0	28	8.00001	0	19	6.99999	0	25	21	12	18	28	0	8.00001	25	0	0	19	19	8.00001	24	12	22	21
	1.25	0	0	5.00001	20	0	16	19	0.99999	21	13	27	0	2.00001	8.00001	9	9.99999	0	23	0	0	0	0	0	16	0	17	14	0	0	5.00001	16	21	30	15	27	24	0	29	28	0	6	27	17	0	29	25	20	29
	1.75	0	0	9.99999	19	11	14	20	11	18	22	25	0	3	8.00001	0.99999	27	0	15	0	0	0	0	9.99999	11	0	18	8.00001	0	0	19	9	9	20	5.00001	20	26	0	30	28	6	0	18	13	0	26	27	23	27
	2.25	5.00001	9.99999	6	8.00001	17	11	16	18	14	25	28	0	0	9	25	23	5.00001	13	0	0	0	0	0	14	0	25	16	0	3.99999	18	0	18	24	0	26	29	0	19	16	8.00001	5.00001	27	14	0	17	29	25	29
	2.75	6	13	11	22	25	9.99999	21	9	17	29	28	0	0	5.00001	29	23	13	22	2.00001	0	0	24	20	17	0	24	11	0	22	25	0	23	30	17	28	22	0	19	27	25	15	18	21	5.00001	26	22	14	20
	3.25	23	22	8.00001	21	30	15	20	21	30	23	25	0	11	0.99999	23	11	14	17	30	0	6.99999	8.00001	0	5.00001	15	25	0	0	6.99999	30	0	23	27	30	15	19	0	16	22	30	24	29	20	8.00001	19	29	26	28
	3.75	27	30	16	24	5.00001	23	22	29	22	26	30	14	12	9.99999	26	27	20	11	27	9	5.00001	14	6	15	17	15	13	17	15	17	6	16	30	30	30	27	8.00001	17	29	30	19	26	26	0.99999	29	28	6	25
	4.25	26	30	18	16	27	20	17	25	18	24	28	9	14	0	30	23	19	19	24	12	11	20	17	26	18	19	9	6	30	28	8.00001	26	30	30	28	26	0	21	30	30	30	30	24	22	26	30	0	30
	4.75	3.99999	29	28	14	29	29	29	30	30	23	26	13	30	9.99999	29	29	21	28	22	20	9.99999	15	29	28	9.99999	24	20	26	0.99999	26	26	27	29	30	30	25	13	23	27	30	30	25	22	19	20	23	23	29
	5.25	28	30	30	17	26	26	30	16	30	29	30	16	30	19	20	12	22	11	29	29	16	29	28	27	9.99999	26	22	26	28	27	30	30	29	28	30	14	28	29	21	30	30	28	15	23	30	19	30	30
	5.75	22	30	30	27	25	24	30	25	26	30	30	18	30	26	14	24	30	15	30	26	3.99999	29	28	27	25	29	16	30	30	30	30	30	25	24	30	21	14	30	30	30	28	30	24	22	23	29	29	30
	6.25	30	30	30	9.99999	24	16	28	29	30	30	30	28	30	23	24	28	24	12	24	29	24	30	30	29	29	28	3	30	30	30	30	30	30	24	30	14	30	30	30	30	30	30	29	29	29	30	21	28
	6.75	30	30	30	6	29	15	19	28	29	30	30	8.00001	29	26	16	28	21	24	28	30	13	30	23	26	30	29	22	30	30	30	30	30	22	28	30	25	30	30	30	30	28	17	28	28	30	18	29	30
	7.25	30	30	30	20	29	26	17	30	23	27	30	28	28	25	30	26	29	6.99999	27	30	14	30	28	29	30	30	28	30	30	30	30	30	30	30	30	24	30	30	28	30	28	30	29	25	19	30	28	27
	7.75	30	30	30	25	30	28	27	30	30	29	30	27	25	20	27	20	17	16	27	30	11	28	18	28	30	28	21	30	15	30	30	30	29	29	30	28	30	30	28	30	27	30	27	19	21	28	29	18
	8.25	30	30	26	26	14	28	22	30	26	23	30	17	28	14	21	29	21	6.99999	22	29	0	25	24	30	30	30	3	30	17	30	30	30	30	30	30	30	30	30	26	30	27	30	30	16	23	27	29	30
	8.75	30	30	24	26	30	22	22	29	30	20	30	25	29	22	29	30	27	26	14	21	6	18	24	25	26	28	11	18	29	30	30	30	30	30	30	25	30	30	23	30	24	24	30	12	22	21	29	24
	9.25	30	29	16	19	30	20	19	30	16	13	30	20	30	9.99999	26	28	25	27	21	6	0	9	25	26	29	17	6.99999	5.00001	11	30	30	30	30	29	30	21	30	30	17	30	23	30	30	29	27	26	30	24
	9.75	30	28	23	17	17	3.99999	19	30	22	19	30	12	18	5.00001	17	21	30	6	20	0	15	2.00001	14	25	18	26	0	0	0	21	24	30	29	29	30	23	30	30	22	30	29	30	30	11	30	28	29	28
	10.25	30	12	14	22	0	0	0.99999	27	25	11	29	0	0	8.00001	29	8.00001	0.99999	0	12	0	24	11	0	18	6	19	0	0	11	11	0	30	29	29	30	30	30	29	18	30	28	30	22	0	25	30	30	24
	10.75	28	0	9.99999	9.99999	0	0	18	3.99999	3	6	22	0	0	2.00001	19	5.00001	6	0	5.00001	0	3.99999	0	0	9.99999	0	13	0	0	0.99999	0	0	20	20	29	25	30	28	23	25	29	24	30	15	6	26	25	30	21
	11.25	0.99999	0	0	5.00001	0	0	0.99999	6.99999	6	0	20	6.99999	6	3	0	6.99999	0	0	11	0	0	0	0	0	0	6.99999	17	0	0	21	0	30	13	24	12	27	21	14	6.99999	15	15	30	6	8.00001	14	29	30	27
	11.75	0	0	12	0.99999	0	0	5.00001	0	0	0	14	0	0	0	0	0	6.99999	3.99999	0	2.00001	6.99999	0	0	0	0	3.99999	6.99999	0	0	0	0	18	26	29	0	26	22	11	0	0	0	29	8.00001	13	17	15	27	17
	12.25	17	19	26	30	24	23	25	23	18	30	24	27	21	24	19	30	23	30	22	30	26	6.99999	6.99999	19	11	26	22	13	23	20	21	20	8.00001	28	30	27	2.00001	17	24	25	27	30	24	28	20	29	27	29
	12.75	30	26	30	28	30	30	30	30	29	30	30	30	23	28	30	30	30	30	30	26	26	30	5.00001	30	30	30	22	24	30	30	30	28	6	28	29	27	21	19	27	30	30	15	30	30	22	25	25	15
	13.25	30	30	30	30	30	30	30	21	30	28	22	30	29	20	21	30	30	29	30	30	29	21	30	30	30	30	29	28	25	30	30	30	28	26	30	28	29	28	30	30	30	25	30	30	25	29	30	22
	13.75	30	29	30	30	30	30	28	28	22	25	24	16	23	30	30	30	29	30	30	29	27	6	22	30	30	30	29	21	30	29	30	28	16	23	30	29	30	15	30	30	30	30	30	30	30	30	30	30
	14.25	30	30	30	30	30	29	26	24	20	29	17	30	26	23	25	26	23	30	30	30	29	30	30	30	30	30	27	22	30	30	30	30	19	21	30	27	11	30	30	30	28	29	30	30	28	24	30	28
	14.75	30	30	30	30	30	30	30	0	25	27	25	30	25	14	25	22	30	30	30	30	30	30	30	28	25	30	27	24	24	30	26	30	24	28	30	26	27	30	27	22	27	30	30	30	22	30	30	30
	15.25	30	29	30	29	30	29	30	27	29	29	26	30	22	30	28	23	17	30	30	22	25	23	24	22	30	30	23	22	20	22	23	20	22	28	30	28	28	30	27	26	26	29	30	30	20	14	30	9
	15.75	21	30	30	30	30	30	26	9	18	27	30	18	27	2.00001	21	26	30	28	24	29	30	14	6	14	26	30	29	25	30	30	30	30	29	30	22	30	30	30	30	26	25	29	29	24	24	26	30	23
	16.25	17	21	30	30	30	30	12	22	21	26	30	23	24	9.99999	30	18	30	30	18	30	28	9	25	30	29	29	19	23	24	27	26	30	14	30	30	30	23	30	24	25	30	29	28	30	30	30	30	30
	16.75	13	28	30	30	27	30	19	17	23	23	30	30	24	14	30	29	17	30	24	29	29	26	19	18	29	30	28	21	26	28	30	30	28	22	27	23	24	30	28	30	30	21	30	30	30	30	30	30
	17.25	18	30	17	29	6	30	22	26	24	29	30	16	20	26	30	17	28	30	24	30	17	26	27	30	30	29	30	25	23	27	30	30	27	29	9.99999	26	30	29	30	27	28	25	19	30	30	29	30	30
	17.75	29	21	24	30	14	22	24	25	23	30	30	26	26	30	30	18	30	30	23	24	27	18	29	21	30	25	28	29	29	27	13	30	29	29	25	30	28	23	30	25	30	30	30	28	30	26	30	19
	18.25	14	11	20	30	16	29	21	20	29	24	30	26	30	30	19	30	20	20	22	27	26	22	27	30	26	30	29	21	30	29	23	30	30	29	16	30	27	26	30	28	30	26	30	21	30	24	30	30
	18.75	28	30	30	30	30	22	17	24	24	30	30	27	20	16	29	26	30	30	25	30	24	27	27	24	22	30	29	17	30	29	30	30	22	30	30	30	30	29	24	30	30	30	30	30	30	30	30	30
	19.25	27	22	18	29	30	27	25	8.00001	24	30	30	30	21	30	30	30	30	30	26	24	30	26	18	25	24	30	30	27	30	30	23	30	28	30	29	30	18	30	30	29	28	30	30	30	30	28	30	30
	19.75	29	28	17	29	6	25	26	18	30	27	27	21	20	30	30	30	30	30	30	30	22	25	28	30	30	30	30	29	30	30	30	30	18	23	30	22	28	30	23	29	30	24	24	30	29	30	30	30
	20.25	25	27	27	30	5.00001	18	18	22	26	25	21	22	30	30	20	24	30	30	30	30	24	20	18	30	30	29	30	27	25	30	22	30	23	26	26	28	27	30	22	24	30	30	29	30	30	17	30	17
	20.75	30	30	23	23	25	22	19	2.00001	9	29	24	16	3	18	22	16	29	30	21	30	26	25	19	30	21	26	30	14	29	13	30	30	30	17	30	30	29	28	29	27	30	30	30	30	30	16	29	25
	21.25	30	20	30	26	30	30	24	12	18	24	29	30	21	30	30	29	21	21	29	28	8.00001	22	21	19	30	27	30	22	20	29	28	30	27	30	30	26	28	27	11	12	30	30	26	30	30	30	30	30
	21.75	24	21	30	26	9.99999	29	21	30	18	30	29	21	30	30	21	30	30	30	25	21	13	6	24	30	15	29	21	16	30	24	25	30	26	24	9	30	27	29	30	19	30	30	25	27	25	30	30	30
	22.25	30	30	30	30	25	30	28	30	28	30	30	20	22	30	30	30	30	30	24	30	23	25	21	30	14	30	27	21	30	30	18	30	15	30	30	16	26	30	20	22	30	30	30	28	23	30	29	17
	22.75	11	22	16	29	27	24	5.00001	14	18	21	23	0	26	28	30	22	19	24	18	30	5.00001	30	27	17	13	30	30	23	15	25	27	30	22	30	30	30	30	28	30	28	29	20	30	28	30	22	23	29
	23.25	23	17	28	24	2.00001	13	6	0	2.00001	19	19	5.00001	12	6.99999	8.00001	14	14	28	0	26	0	0	3.99999	30	22	5.00001	15	3.99999	21	9.99999	13	29	30	15	18	25	30	25	23	9.99999	30	30	30	25	30	29	30	30
	23.75	18	15	14	26	25	19	9.99999	0	14	17	13	0	28	29	17	11	5.00001	13	13	30	0	0	23	3	5.00001	17	15	0	14	0	0	16	25	25	25	23	25	12	26	13	25	25	17	16	25	24	25	20
	b: Sleep pattern
	Bin (hours)	dome-i TRiP/+																															repo>dome-i TRiP
	0.25	8	8	9	14	19	8	8	11	8	8	8	8	8	14	8	8	8	8	13	8	8	8	8	8	8	17	9	8	16	8	9	28	21	6	25	28	27	10	29	25	17	28	16	27	17	30	30	27
	0.75	0	5	0	0	10	16	27	24	0	0	0	0	0	4	0	9	0	11	7	12	1	25	0	0	0	23	0	6	9	5	0	11	14	5	18	0	23	3	29	27	10	30	23	22	24	28	28	29
	1.25	5	5	5	0	8	2	22	10	0	0	0	0	8	8	12	7	0	0	18	6	11	9	13	10	0	20	3	7	0	17	0	0	5	0	5	0	27	2	27	26	8	30	30	21	20	29	21	29
	1.75	14	0	0	0	11	0	24	12	0	0	0	5	5	5	5	9	0	10	15	1	13	8	9	24	0	15	2	0	12	17	6	0	0	6	6	13	26	0	25	25	12	30	12	24	25	28	28	26
	2.25	14	13	6	0	1	15	24	20	0	0	6	0	21	12	1	13	0	4	18	0	23	25	9	7	0	20	6	0	11	12	0	0	15	0	16	5	12	0	22	18	12	30	27	15	24	29	27	5
	2.75	0	10	16	0	13	6	23	14	0	0	0	0	8	8	15	9	10	7	30	5	14	11	6	19	5	20	18	0	18	12	0	1	17	7	8	0	26	5	30	19	27	30	29	30	26	30	28	5
	3.25	6	7	10	14	16	0	11	15	4	5	0	9	16	7	21	18	0	9	19	0	23	29	14	24	10	14	13	0	5	21	11	5	16	0	7	5	26	0	30	21	27	30	23	27	27	30	27	10
	3.75	11	8	26	17	22	0	24	22	8	0	18	11	18	7	23	25	6	21	12	13	21	24	5	30	15	26	28	10	19	27	8	0	4	0	18	25	28	5	29	24	13	30	28	23	28	30	28	15
	4.25	10	19	29	28	13	12	21	29	12	0	23	7	19	26	25	27	15	16	21	14	23	15	25	24	23	20	26	0	15	24	11	22	12	12	23	29	30	11	25	28	16	28	28	8	30	27	28	15
	4.75	25	12	28	29	0	20	28	29	14	17	30	13	26	20	28	25	21	18	23	0	29	16	28	30	21	28	26	26	26	28	30	6	17	3	29	30	27	0	30	24	27	25	29	22	17	30	28	16
	5.25	19	6	30	30	23	23	19	30	25	20	30	17	22	16	30	30	30	20	14	7	26	26	28	30	21	21	30	22	30	25	30	5	16	14	30	18	22	2	30	28	28	30	17	21	14	30	29	25
	5.75	17	18	30	30	26	30	30	25	30	22	30	16	26	19	28	27	22	22	17	14	25	22	30	30	26	28	30	28	25	25	30	21	13	16	29	21	30	3	30	28	28	30	30	30	23	30	30	30
	6.25	22	22	27	30	24	30	29	27	30	28	30	16	30	27	30	30	30	30	17	14	30	12	30	30	25	24	30	20	30	30	30	25	19	12	28	26	30	13	30	30	21	30	23	15	22	30	30	28
	6.75	28	17	17	30	30	30	28	30	30	25	30	20	30	30	30	30	27	27	25	21	30	16	30	30	30	18	30	23	30	25	30	30	10	22	30	30	30	29	30	28	14	30	27	27	30	30	30	28
	7.25	17	18	26	30	24	27	30	27	30	14	30	23	30	28	30	30	29	28	20	22	30	24	30	30	30	9	30	24	27	30	30	30	7	18	30	26	29	23	30	29	22	30	30	30	28	30	29	29
	7.75	28	24	30	30	30	30	25	26	30	21	30	26	30	29	30	30	30	27	12	25	30	28	30	30	29	16	30	24	30	30	30	30	16	28	30	30	30	18	26	19	24	30	20	30	25	30	30	30
	8.25	19	21	28	30	30	26	27	25	30	9	30	30	30	30	29	30	30	29	17	27	30	15	30	30	25	10	30	16	30	30	30	30	8	27	30	30	30	23	30	29	29	30	27	30	18	30	30	26
	8.75	25	25	29	27	20	30	10	24	30	19	30	25	30	29	30	30	30	14	20	29	30	26	30	30	27	10	30	0	30	30	30	30	9	30	30	29	29	24	30	28	24	30	28	30	27	30	23	27
	9.25	24	19	20	28	14	15	18	30	30	28	29	27	30	30	29	30	30	3	25	22	30	22	30	28	16	5	30	0	28	24	30	30	6	30	30	29	29	26	25	30	25	30	30	27	13	30	28	16
	9.75	15	11	29	15	16	20	24	23	16	7	23	25	30	30	29	13	27	7	0	25	30	24	30	28	12	21	30	0	30	30	28	30	12	30	29	29	30	22	23	30	27	30	19	30	29	30	28	29
	10.25	12	9	18	20	13	27	14	21	26	11	19	9	30	30	20	28	3	23	7	1	28	25	30	22	6	11	28	0	25	30	20	30	13	28	29	30	30	19	26	30	11	30	24	30	30	30	26	30
	10.75	5	13	29	0	21	3	20	19	26	5	30	5	12	26	20	9	0	3	12	11	24	19	12	21	0	15	27	8	18	22	0	30	6	30	29	30	22	28	24	30	4	30	25	30	30	30	15	30
	11.25	5	19	6	0	10	1	6	0	1	4	5	9	10	6	9	0	10	0	14	13	10	8	13	24	5	5	8	6	12	19	6	30	4	20	30	3	5	11	0	30	10	30	30	28	26	24	0	30
	11.75	8	0	0	0	5	19	14	11	0	5	0	0	6	13	0	0	4	0	5	6	9	15	0	15	10	0	0	0	0	16	5	23	4	8	6	9	3	8	0	29	0	17	20	24	15	24	0	28
	12.25	7	7	0	6	8	12	10	0	0	0	0	0	0	7	3	9	17	3	17	20	0	18	0	22	0	18	0	0	8	13	22	9	23	0	23	11	27	9	0	29	0	16	16	26	30	21	15	29
	12.75	11	11	7	9	30	22	15	13	6	12	8	16	9	29	18	30	30	17	30	30	20	30	11	27	7	29	18	2	30	23	30	25	16	0	30	6	22	24	9	25	0	27	22	30	30	30	23	29
	13.25	29	29	30	30	30	30	26	30	30	30	30	28	30	30	30	30	30	26	30	30	30	30	30	30	24	30	30	27	27	26	30	17	28	0	30	17	13	12	18	28	0	15	15	29	30	30	28	5
	13.75	30	29	30	30	30	30	21	30	30	30	18	30	30	25	28	26	30	30	30	30	30	30	30	21	27	30	30	30	30	30	30	7	29	0	30	30	28	29	24	25	5	27	30	21	30	30	23	14
	14.25	30	29	30	30	30	24	24	30	30	30	30	30	30	30	30	27	30	30	30	30	30	30	21	30	30	30	30	21	29	30	30	9	30	14	30	30	19	9	29	28	14	30	30	19	30	30	20	30
	14.75	30	28	8	30	30	30	28	30	30	30	30	25	30	30	26	30	30	30	30	29	30	30	30	28	30	21	30	24	30	30	30	19	24	27	30	8	29	19	8	19	29	21	11	14	30	30	30	30
	15.25	30	19	24	25	26	30	30	30	30	9	30	26	30	27	27	17	30	30	30	30	30	30	29	29	22	26	26	30	30	30	30	30	30	30	30	30	26	25	25	22	30	23	11	16	30	30	30	30
	15.75	7	30	30	30	20	23	22	30	30	30	30	29	30	30	30	0	30	24	30	30	30	30	21	25	18	22	30	25	30	30	30	30	28	29	30	20	27	27	27	23	24	10	19	9	30	30	30	29
	16.25	30	30	30	23	30	30	30	30	30	30	30	20	22	30	30	20	30	30	30	30	30	30	30	26	24	28	30	22	30	23	30	30	28	27	30	23	30	24	27	28	29	30	13	20	30	30	30	30
	16.75	30	30	26	30	30	23	30	30	30	24	30	24	30	30	30	25	30	30	30	30	30	30	27	26	30	30	30	20	30	26	30	30	20	19	14	30	23	19	14	17	25	30	30	12	19	30	30	30
	17.25	30	30	18	30	19	30	30	30	30	13	30	30	30	30	30	30	30	30	30	27	30	30	30	30	30	30	30	30	30	30	30	30	30	29	29	30	30	12	23	30	26	30	21	25	29	30	30	29
	17.75	30	30	30	30	30	23	30	25	30	28	30	20	30	30	30	24	30	30	30	30	30	30	30	30	30	30	30	30	30	25	30	8	30	29	29	30	30	30	30	28	30	30	13	26	30	30	30	30
	18.25	30	30	30	30	30	19	30	28	22	29	30	30	30	30	30	24	30	30	30	30	30	30	30	30	30	30	16	22	30	21	30	27	30	23	12	29	25	28	20	30	30	30	18	22	15	30	30	30
	18.75	30	30	30	30	30	26	30	26	17	26	30	26	30	30	30	30	19	30	30	30	30	30	28	29	30	30	30	30	30	30	30	12	30	25	21	24	8	16	30	30	30	30	28	20	25	30	30	30
	19.25	30	30	30	29	30	30	18	21	30	30	30	25	30	30	30	30	26	30	30	30	30	30	25	27	30	30	30	30	30	29	30	29	18	28	30	30	8	30	30	30	12	30	28	17	30	30	30	24
	19.75	30	30	30	30	30	22	18	30	30	27	22	30	30	30	30	30	25	30	30	30	30	30	30	12	30	23	26	30	30	30	30	21	30	28	30	30	28	30	30	30	11	30	29	20	30	30	30	30
	20.25	26	30	11	30	30	30	30	30	27	26	29	20	26	30	30	24	23	30	30	29	30	30	23	22	30	25	30	30	30	30	30	29	21	19	30	30	25	23	30	30	24	21	29	20	30	30	30	26
	20.75	7	30	30	22	24	28	30	21	0	30	30	30	30	30	30	20	30	20	18	30	30	23	30	30	30	30	27	30	24	30	30	30	23	30	23	17	27	21	30	22	22	30	30	22	20	30	30	27
	21.25	30	30	21	9	30	30	16	30	28	24	30	24	26	30	30	25	30	28	29	30	30	30	30	30	29	27	29	27	30	30	29	30	30	30	25	20	14	30	30	19	17	30	30	21	26	17	30	29
	21.75	18	30	23	16	30	26	29	25	30	20	30	30	26	30	30	30	17	22	24	21	30	18	23	30	17	30	16	24	30	30	30	30	30	30	30	25	29	24	30	27	20	30	30	23	30	30	26	30
	22.25	27	22	14	6	11	30	30	30	10	30	30	7	3	30	26	14	19	13	30	30	30	28	30	30	27	30	30	28	30	30	30	30	30	19	24	30	30	30	30	20	30	30	26	29	26	30	30	30
	22.75	0	27	30	14	24	26	21	30	30	22	5	27	19	30	20	30	30	30	30	30	25	27	21	29	25	30	30	30	30	30	30	30	30	22	25	28	30	23	30	26	26	24	28	30	26	30	27	24
	23.25	7	1	4	5	13	3	6	3	6	0	0	7	3	9	14	4	0	4	4	10	25	8	14	15	0	16	3	9	3	21	12	30	28	23	30	30	29	29	30	30	22	30	27	24	29	30	20	28
	23.75	0	0	0	0	11	7	9	17	0	0	0	0	5	6	6	11	5	12	0	7	0	10	7	19	8	0	0	0	5	24	8	29	22	23	25	30	7	26	10	26	21	30	17	19	30	30	21	27
	c: Sleep pattern
	Bin (hours)	dome-i GD/+																																repo>dome-i GD
	0.25	13	0	0	0	0	0	2.99999	6.4	6	0	0	4.00001	0	3.00001	0.99999	0	1e-05	1.99999	5	0	15	13	6.99999	6.00001	16	0.99999	17	0	0	21	12	0	0	0	6	0	0	0	0	0	0	0	0	0	0	0	0	0
	0.75	6	9.00001	9	0	0	0	1e-05	0.99999	0	0	0	0.99999	0	4.00001	0	6	5	0	4.00001	0	0	24	5.00001	5.99999	21	27	4.00001	0	0	0	0	5.00001	0	0	0	0	2	0	0	0	5	0	0	0	5	0	2	0
	1.25	8.00001	0	0	0	0	0	1.00001	0	0	0	0	0	0	0	0	1e-05	30	0	2	0	0.99999	17	0	0.99999	13	28	0	0	0	0	0	0	0	0	13	0	3	0	0	0	0	0	0	0	13	0	18	0
	1.75	0	0	0	0	0	0	9.00001	0	0	0	0	0	0	0	6.99999	0	18	0	1.99999	1e-05	1e-05	0.99999	0	0	18	29	0	0	0	0	0	0	0	6	0	0	3	0	5	5	5	0	7	0	8	0	10	3
	2.25	5.00001	0	0	0	0	0	0	0	0	0	0	1e-05	0.99999	3.00001	5.00001	0	0	0	2.99999	0	0	2	24	0	2.99999	30	1e-05	0	6	0	0	0	0	11	2	0	4	10	5	8	9	7	14	15	15	7	23	8
	2.75	0	0	0	6.99999	0	0	0	0	0	0.99999	0	0	6.99999	4.99999	0.99999	0	0	0	7.00001	1e-05	0	2	0	0	8	15	0	0	0	0	0	0	6	12	9	0	6	5	0	11	5	10	2	12	16	1	14	12
	3.25	0	19	0	6.99999	0	0	7.99999	0	0	0	0	1.99999	13	6.00001	0	0	0	6	8.99999	0	0	0.99999	5.00001	0	8	15	0	0	0	0	0	1e-05	5	15	0	0	6	0	0	0	0	7	10	19	14	6	18	12
	3.75	30	3.2	6	9.99999	0	0	30	0	0	0	0	0	19	1	0.99999	0	12	0	4.00001	0	0	0	22	0	7.00001	6.99999	0	1e-05	0	0	0	0.99999	0	18	6	6	13	7	12	7	0	22	8	23	20	1	11	28
	4.25	5.00001	9.99999	0	10	1e-05	0	30	1e-05	0	6	0	4	19	3.00001	9.4	0	12	0	1e-05	1e-05	1e-05	0	14	1e-05	1e-05	5.00001	3.99999	0	0	5.99999	0	4.00001	0	28	17	17	14	11	5	29	10	14	15	24	20	12	25	21
	4.75	30	1.99999	0	18	0	1e-05	27	5	0	15	0	7.99999	7	0.999999	23	0	16	6.00001	0.99999	5.99999	8	0	27	0	1	20	6	0	0	0	16	7.00001	5	27	20	24	9	16	11	30	10	30	17	25	29	19	20	30
	5.25	30	24	13	19	6.99999	0	14	9.00001	0	8.00002	30	4.99999	22	6.99999	25	0	12	7.99999	6.00001	0.99999	0.99999	0	21	15	5.99999	21	27	15	0	1e-05	4.00001	24	23	30	30	30	24	23	0	25	13	17	9	29	29	15	25	30
	5.75	30	26	8	24	28	6	30	5.00001	26	22	30	30	21	5.99999	25	5.00001	6.6	9.99999	1e-05	9.99999	0.999999	0	21	4.99999	4.00001	13	6	27	0	10	0	12	30	30	30	30	30	30	11	29	28	25	23	26	23	18	25	30
	6.25	30	28	14	30	0	4.99999	27	24	5.00001	27	30	12	6	30	23	27	24	30	1.00001	5.00002	24	30	27	27	18	21	30	13	0	16	16	13	30	30	30	30	30	29	10	30	30	28	29	30	30	29	28	30
	6.75	29	28	27	30	3	6.99999	22	27	26	24	30	27	25	7.00001	28	6	9	17	3.00001	6.99999	5	29	26	17	11	13	30	24	15	15	6.8	19	30	30	30	30	27	30	10	24	30	30	28	30	30	30	29	30
	7.25	26	31	4.99999	30	27	30	23	21	25	27	27	28	20	5.00002	30	25	29	4.99999	8	9.99999	9.8	30	24	10	7	16	30	24	15	30	0.99999	27	30	30	30	30	30	30	20	21	30	30	29	29	30	29	29	30
	7.75	29	27	8.00002	30	24	17	24	30	16	30	30	24	30	6.99999	30	29	20	11	9	27	6.00001	31	27	13	12	16	30	31	13	18	1e-05	24	29	30	30	30	30	30	12	28	30	30	30	12	30	30	27	30
	8.25	29	26	27	30	20	16	24	30	5.00001	30	30	18	31	31	24	30	29	14	7	28	6.00001	28	23	9.99999	5.00001	15	30	24	16	16	13	30	20	30	30	30	30	30	29	21	30	30	28	27	30	30	25	30
	8.75	25	31	6.00001	24	20	29	25	28	3.99999	12	30	19	30	9.99999	30	9.99999	29	21	1	25	4	24	29	23	0.999999	15	30	30	6.99999	24	30	30	29	30	30	29	30	30	25	30	30	30	26	30	27	29	30	30
	9.25	28	29	0	27	6	27	30	28	25	19	24	22	12	15	26	29	29	3.5	4.00001	6.5	5.00002	30	21	26	7.99999	65	30	26	6	13	0	22	27	30	30	30	30	29	29	25	30	30	29	29	30	30	30	30
	9.75	27	28	3	28	3.99999	12	28	27	11	30	30	3	6	0	30	30	24	0	6.1	9.99999	0	0	26	5.00001	6.7	5.00002	21	18	0.99999	11	0	30	26	29	28	30	30	30	29	28	30	30	27	28	30	16	29	30
	10.25	28	0	6	20	6.99999	11	14	19	0	24	31	6.4	6.99999	0	8.00001	22	19	5.00001	5.00001	0	0	0	22	4.00001	9.00001	6.9	24	9.99999	6	6.5	9.99999	30	29	30	15	6	30	30	29	19	30	30	18	28	27	25	29	30
	10.75	6	0	0	15	9.2	5.00001	11	8	0	0	0	5.00001	9	0	9	30	15	8.00001	8.99999	0.99999	0	15	3	0	0	30	7	2.99999	0	0.99999	0	25	29	10	0	0	30	30	17	14	30	30	28	25	27	8	28	30
	11.25	0	0	0	6	0	0	9.1	5.99999	0	0	5.00001	0	0.99999	0	9.99999	0	0	0	0	0	2.99999	0	0	0	4.99999	6.9	3.00001	0	0	0	7	6	28	0	0	0	26	30	13	0	30	30	30	30	9	0	29	18
	11.75	0	0	0	0	0	0	2.00002	0.99999	0	0	0	0	0	0.99999	6	0	0	6	0	1e-05	0	0	0	0	1e-05	2.00002	0	0	0	0	0	1e-05	17	0	0	0	20	29	0	0	22	23	20	22	5	0	25	0
	12.25	28	19	30	2.00001	9	3.00001	30	8.00001	11	0	27	8.00001	15	28	21	6.99999	25	25	4	24	4	30	5.00001	2	29	30	11	9.99999	28	0	4	0	0	23	20	1	18	13	3	7	14	0	8	6	8	20	26	5
	12.75	30	18	24	25	6.9	9.4	9.4	17	21	30	13	22	25	30	30	17	25	14	21	9.99999	7.00001	27	27	1.99999	31	30	30	30	30	28	1e-05	0.99999	0	29	28	27	21	12	2	21	24	0	19	7	16	30	19	26
	13.25	30	30	30	23	30	14	22	21	21	30	26	27	8.00001	30	30	21	30	23	21	17	2.99999	30	25	30	27	31	28	27	30	30	13	12	0	29	25	26	28	0	14	21	29	0	14	11	29	30	25	30
	13.75	22	30	19	30	29	15	18	27	22	30	12	27	7	27	24	14	21	19	9	21	4.00001	28	30	24	30	31	25	28	28	31	27	24	15	9	27	27	26	0	17	30	30	0	24	23	25	30	20	30
	14.25	30	27	9	30	21	30	29	27	23	21	30	15	3.99999	27	25	28	21	30	20	30	22	28	30	30	25	31	30	25	22	30	30	30	16	30	23	29	30	17	25	24	29	9	24	29	24	30	29	26
	14.75	24	23	12	30	18	30	21	30	15	25	30	27	25	30	16	24	21	25	30	25	0.999991	20	30	30	21	29	24	19	29	28	19	30	17	30	22	19	29	29	26	30	28	0	27	29	27	30	29	30
	15.25	30	22	16	25	10	12	30	15	20	25	21	30	9.99999	22	25	30	24	17	24	20	24	12	30	19	26	30	30	24	26	30	24	30	26	30	29	24	29	30	25	25	30	0	28	29	28	30	27	30
	15.75	30	18	27	31	13	16	23	19	18	17	26	30	22	21	18	18	9.8	16	20	12	27	24	30	30	24	30	26	20	24	9	17	30	23	25	26	26	26	30	29	27	30	6	22	26	25	30	22	23
	16.25	30	24	30	24	12	30	22	14	2.00001	27	30	30	9.99999	29	22	10	25	28	20	0	28	23	30	19	29	30	30	30	16	20	9.99999	30	28	30	29	15	28	30	25	22	26	22	28	28	21	30	30	30
	16.75	30	30	30	30	19	20	30	19	30	30	30	30	15	29	24	18	9.3	30	28	9	24	30	30	30	24	30	28	29	29	26	22	22	26	24	30	27	26	30	28	30	27	28	25	25	22	30	30	29
	17.25	30	28	30	13	21	19	28	27	15	18	30	30	12	18	27	25	26	30	21	18	30	23	30	31	25	30	18	17	12	21	15	30	30	29	25	30	16	30	29	30	30	29	20	29	30	30	30	28
	17.75	30	30	30	19	24	25	30	19	30	27	30	31	18	30	24	9	5.99999	16	20	26	30	20	22	30	29	30	30	3.00001	23	26	12	15	26	29	29	29	29	30	21	24	26	30	20	21	29	30	30	30
	18.25	31	26	30	23	22	30	21	23	30	19	30	21	29	21	21	31	10	30	15	9	30	15	28	30	25	30	18	30	18	21	29	30	29	20	30	29	23	30	28	29	29	30	26	26	25	28	30	30
	18.75	30	28	28	26	20	30	21	28	21	17	16	30	28	22	30	12	9.00001	30	24	21	30	21	19	30	22	30	18	31	24	23	27	30	29	30	29	30	29	30	26	27	28	30	23	30	13	30	30	28
	19.25	23	17	18	30	22	28	22	20	19	21	25	24	14	29	28	9.6	7	27	16	6	25	23	21	30	24	31	25	13	30	18	27	31	25	30	25	28	30	30	30	25	30	30	30	29	29	30	27	30
	19.75	28	24	0	31	23	30	24	15	21	16	16	26	26	30	21	24	15	21	23	14	21	27	9	30	21	30	0	31	22	21	18	30	28	30	29	30	29	30	30	10	30	22	18	24	27	30	29	30
	20.25	25	26	0	30	8.00001	27	30	5.00001	22	15	28	11	23	24	30	14	27	22	16	13	20	19	30	30	25	29	16	21	30	0.99999	22	30	30	26	7	22	23	30	18	24	30	30	24	17	26	30	26	30
	20.75	26	9	8.00001	23	13	17	24	18	9.4	16	28	24	19	24	12	11	9.5	30	0	7.99999	0	6.99999	31	30	26	30	6.5	8.00002	31	30	18	15	19	30	23	26	30	30	29	23	27	22	28	29	24	30	30	28
	21.25	27	25	22	0	14	6.9	30	21	23	30	23	30	18	30	30	30	27	18	3.9	11	30	16	30	0	23	30	19	13	31	27	25	2.00001	20	30	24	30	26	30	23	24	18	23	30	22	24	30	30	30
	21.75	30	28	30	1.99999	30	30	29	30	17	30	15	30	30	27	18	15	24	30	21	21	30	9.99999	24	30	22	30	30	30	30	27	26	30	1	30	27	28	19	30	25	24	30	28	27	30	23	30	24	30
	22.25	28	24	30	30	31	30	30	31	9.9	21	18	28	21	30	15	24	19	27	8.00001	8.00002	30	24	30	31	27	30	27	11	30	30	23	30	19	30	5	30	28	30	29	29	11	6	28	29	29	30	26	30
	22.75	24	9	9.99999	3.99999	2.00001	8.00001	23	8.00001	4.99999	9.4	3.99999	6	13	6	19	21	0.99999	0	9	0	23	21	22	9.99999	19	30	1e-05	0	23	17	6.99999	22	23	30	12	25	26	29	22	21	29	20	25	30	30	30	30	27
	23.25	12	0	0	0	6	5.99999	9.99999	0	7.00001	0	21	4.99999	9	8.99999	22	13	0	0	1e-05	0	6	6	15	8	18	30	1e-05	1e-05	21	0	6.99999	0	0	25	20	23	28	24	22	18	29	0	26	22	13	29	30	16
	23.75	2	0	0	0	0	5.00001	0	0	0	0	0	0.99999	0	1.00001	2.00001	6.4	0	9	0	0	0	0	19	5	5.00001	30	0	0	0	0	0	0	0	21	5	18	19	0	5	3	12	0	18	28	5	20	23	13
	d: Day sleep								e: Night sleep								f: Motion bout lenght								g: Motion bout activity
	dome-i KK/+	repo>dome-i KK	dome-i TRiP/+	repo>dome-i TRiP	dome-i GD/+	repo>dome-i GD			dome-i KK/+	repo>dome-i KK	dome-i TRiP/+	repo>dome-i TRiP	dome-i GD/+	repo>dome-i GD			dome-i KK/+	repo>dome-i KK	dome-i TRiP/+	repo>dome-i TRiP	dome-i GD/+	repo>dome-i GD			dome-i KK/+	repo>dome-i KK	dome-i TRiP/+	repo>dome-i TRiP	dome-i GD/+	repo>dome-i GD
	454	609	337	447	301	393			598	681	529	571	616	449			24.6364	6	12.6452	21.4615	16.96	63.8			1.11022	1.39956	0.72344	0.970763	1.2737	0.999244
	445	636	309	264	277	456			584	547	592	639	452	655			28.8	3.5	13.871	11.6923	20.8636	43.25			1.40289	3.94524	0.753762	1.29528	1.42634	0.8743
	443	573	448	352	162	386			596	632	516	504	389	585			23.5833	8.16667	14.4091	21.913	48.9167	50.6667			1.09352	2.67161	1.00049	0.895441	1.71999	0.78417
	407	604	402	545	380	352			620	626	524	640	469	660			17.6111	8.92308	26.3077	7.58333	23	23.8667			1.06519	2.65019	1.19926	1.09613	2.00177	0.720974
	413	593	399	475	130	457			689	651	606	589	473	521			9.30303	3.71429	13.48	12.5714	45.4615	12.5417			0.856689	4.464	0.987527	1.68994	1.1167	1.4969
	398	412	390	601	208	459			542	608	584	565	596	591			17.2105	33.6	19.3333	4.95833	39.6923	23.8571			1.86096	1.99545	0.909889	1.01545	0.880019	1.26567
	360	587	506	285	581	272			631	635	563	550	573	505			12.2333	6.65	6.87097	18.913	4.7931	44.6364			2.55911	0.846063	1.0257	0.723929	2.56842	1.02962
	458	560	504	610	360	384			522	636	600	564	455	417			7.82353	4.31579	7.71429	8.05263	19.45	23			1.42748	3.98531	1.34715	3.33111	1.58902	2.14121
	463	533	380	635	120	437			432	597	536	623	506	521			16.5	32	39.4	2.93103	60.5	28.5454			1.80702	0.850581	1.10097	2.27847	1.17751	0.770321
	493	486	248	436	277	483			522	693	530	477	523	385			10.8636	10.3043	28.8889	10.7714	21.5454	68.8333			1.14274	1.7109	1.09922	1.1664	1.88576	0.950227
	466	645	431	698	242	427			639	658	562	634	466	551			10.5833	4.41176	42.625	4.16667	62	32.4			1.55488	1.45166	1.33085	4.00303	1.1331	1.00582
	640	519	301	595	407	493			623	671	534	552	567	592			4.3	6.67742	17.6538	5.07407	12.3077	7.73077			2.27414	1.19818	1.38062	2.33227	2.32107	1.19646
	242	310	475	601	263	497			524	676	559	514	423	450			17.7407	17.0833	16.3889	5.125	26.1111	27.5			1.13949	0.843581	1.08498	3.08963	1.04269	1.08847
	355	582	454	568	398	335			553	653	643	666	658	649			24.9333	4.27273	13.4286	4.75	11.5	31.6923			1.15103	3.1757	1.0307	4.11854	2.93463	1.795
	277	606	482	699	332	529			559	632	618	698	522	623			15.4828	4.42308	13.25	2.3	22.0556	11.3143			1.02291	2.52713	0.951303	1.56	1.51522	0.729126
	452	586	467	601	154	492			605	698	540	653	574	624			11.08	5.48	18.2667	5.80952	49.0833	25			1.40301	2.74203	1.21904	1.26655	1.04212	0.730074
	453	618	362	563	323	366			591	613	601	650	452	502			8.6129	4.47826	30.9167	5.64286	18.0909	24.7059			1.73621	3.32931	1.50781	1.26753	1.53475	1.36421
	352	637	337	306	327	400			605	578	589	633	543	604			17.8095	4.4	20.5	29.6429	21.8333	31			0.915082	4.84257	1.10494	0.701106	1.49551	1.95503
	336	631	381	367	379	409			674	599	632	707	415	597			11.6364	3.46429	11.7333	22	8.575	13.16			1.22392	3.14264	1.39552	0.816714	1.49638	1.63409
	380	465	296	602	176	466			579	653	653	674	411	554			13.92	18.2143	20.6191	4.91667	24.9091	27.3			1.08707	1.72218	0.93245	2.59634	1.39369	1.19575
	273	365	528	603	229	512			677	636	640	614	451	657			29.8	10.4412	11.6	21.5	26.1579	36.4444			0.897885	2.04935	1.15753	1.30423	1.32125	0.773739
	171	472	452	410	207	510			525	659	642	629	515	693			30.5	10.12	9.89286	22.1429	23.3182	22.36			0.936509	1.4971	1.12591	1.16852	1.24623	0.756999
	322	655	470	418	374	516			468	669	580	632	536	594			32.3846	3.25	17.5882	15.25	15.4583	18.6875			1.04117	3.57679	1.52162	1.41793	2.01464	0.631959
	324	638	554	664	284	513			511	671	627	709	595	694			19.9048	3.4	9.10526	5.09091	20.6364	27.75			1.21985	3.61	1.20917	3.04695	2.57394	0.842615
	444	625	344	653	518	475			600	634	558	654	522	457			11.48	4.26087	18.6522	3.44444	5.91429	45.2			0.96773	2.2471	1.10413	1.9791	1.54709	1.21175
	323	545	396		436	553			582	705	625		639	708			34.6667	13.5714	13.4		7.94444	11.2632			0.983573	0.918179	0.921484		1.87953	0.983717
	536	525	494		439	516			663	629	581		486	493			6.06452	4.67442	19.1429		28.6	43.25			1.37664	2.53808	1.18113		1.39786	0.940818
	270	471	228		249	565			630	684	551		428	605			18.16	15.9375	30.5556		24.55	7.56			0.841698	1.59149	1.55635		1.46612	1.41656
	278		476		37	432			498		636		520	385			64.8571		13.3		23.9524	25.4375			1.09308		1.14777		1.04642	0.889145
	338		537		251	523			618		651			582			32.4167		10.5263		37.2667	11.8461			1.11822		1.04323			1.56756
	495		404		161				609		671						13.8235		29.4546		23.1875				0.951235
	359				402				588								45.25								1.07703
	h: Food intake				i:TAG levels
	repo>				repo>
	w1118	dome-i KK			w1118	dome-i KK
	35.3	26.7			0.805679	1.05667
	17.1	24.4			0.95124	1.06865
	16.7	18.6			0.89613	1.00455
	26.6	33			0.974003	1.06266
	32.9	30.3			0.879358	0.880556
	24.6	20.8			1.13154	0.881155
	14.5	33.3			1.25434	0.88415
	15	21.5			1.14352	1.03211
	15.1	23.4			0.988978	0.928477
	14.5	17.9			0.975201	0.92668
	17.6	19.6
	21.9	38.5
	13.8	14.2
	16.2	12.4
	22.5	28.4
	17.1	32.2
	23.5	34.4
	18
[truncated: 13 more columns]

## Sheet: Figure 3
	Figure 3
	a: Relative expression
	upd3				upd2
	EEC>	H2O2 EEC>	EEC>upd3 OE		EEC>	H2O2 EEC>	EEC>upd3 OE
	1.24	5.4	2.98		0.81	2.1	1.25
	0.87	8.22	3.35		0.49	1.9	1.04
	2.73	4.36	10		2.06	3.08	2.12
	1.14	7.97	8.32		0.84	2.44	2.42
	b: Day and night sleep														c: Day and night sleep
	EEC>w1118	Day 1 - normal food		Day2-6 - on 0.1% H2O2			Night 1 - normal food		Night 2-6 - on 0.1% H2O2						EEC>w1118	Day 1 - normal food		Day2,3 - on 1% H2O2			Night 1 - normal food		Night 2,3 - on 1% H2O2
	Day1	Day2	Day3	Day4	Day5	Day6	Night1	Night2	Night3	Night4	Night5	Night6			Day1	Day2	Day3	Night1	Night2	Night3
	339	429	435	474	454	571	512	473	456	516	555	605			339	525	410	603	669	472
	211	343	468	466	460	478	489	542	554	504	570	591			211	470	428	482	531	561
	199	304	374	413	478	628	390	503	346	433	557	654			199	363	295	412	532	607
	263	487	424	478	522	601	499	547	510	565	612	656			263	478	500	460	589	587
	299	403	447	514	432	454	550	582	626	579	573	470			299	449	530	503	566	604
	365	398	472	465	527	506	524	540	523	466	455	458			365	526	445	582	631	466
	297	346	404	482	499	498	505	571	549	551	567	633			297	430	574	625	657	555
	375	542	554	563	599	597	512	583	599	634	487	583			375	402	495	666	495	588
	369	357	403	437	389	321	538	517	527	533	526	397			369	563	409	532	641	443
	188	307	421	480	482	483	517	564	623	547	620	599			188	451	477	555	583	553
	229	365	409	518	547	402	529	540	583	550	618	662			229	451	491	421	511	508
	565	314	358	410	398	552	681	602	640	613	654	629			565	435	308	486	600	554
	294	286	354	450	502	592	609	533	572	623	613	641			294	453	289	607	686	284
	189	303	403	419	460	482	575	553	490	519	558	640			189	474	355	589	569	620
	293	411	522	544	574	592	453	493	496	584	630	650			293	354	417	582	629	654
	447	507	513	472	549	412	544	642	654	638	637	554			447	375	426	376	280	690
	475	318	381	358	363	570	657	672	660	654	633	670			475	372	519	613	586	415
	317	587	570	574	494	641	655	438	530	524	653	698			317	401	483	670	670	649
	243	457	453	431	552	442	598	605	596	620	659	498			243	431	373	567	292	642
	239	176	368	494	515	475	583	618	649	637	602	635			239	507	505	268	395	604
	340	479	465	450	441	533	616	578	573	538	493	636			340	441	476	522	636	515
	351	325	447	480	380	269	619	537	500	474	576	394			351	416	554	663	656	571
	259	232	276	347	508	681	537	512	480	543	626	704			259	461	375	534	500	433
	353	369	518	500	610	330	481	612	633	644	665	580			353	429	467	563	465	524
	279	382	436	604	276	516	590	668	650	686	556	678			279	477	460	598	652	690
	240	280	295	303	449	445	683	596	552	549	654	452			240	404		532	562	446
	381	357	515	528	281		498	659	682	668	611				381	339		555	603
	253	206	322	271	466		626	536	619	628	699				253	456		536	483
	534	506	447	397	404		532	681	675	686	510				534			527	529
	273	218	353	395			668	539	592	554					273
							524
	d: Day Sleep																	e: Night Sleep
	EEC>	Day 1 - normal food		Day2,3 - on 1% H2O2														EEC>	Night 1 - normal food		Night 2,3 - on 1% H2O2
	Day1	Day2	Day3	Day1	Day2	Day3	Day1	Day2	Day3	Day1	Day2	Day3	Day1	Day2	Day3			Night1	Night2	Night3	Night1	Night2	Night3	Night1	Night2	Night3	Night1	Night2	Night3	Night1	Night2	Night3
	w1118	w1118	w1118	upd2-i SH	upd2-i SH	upd2-i SH	upd3-i KK	upd3-i KK	upd3-i KK	upd3-i TRiP	upd3-i TRiP	upd3-i TRiP	upd3-i GD	upd3-i GD	upd3-i GD			w1118	w1118	w1118	upd2-i SH	upd2-i SH	upd2-i SH	upd3-i KK	upd3-i KK	upd3-i KK	upd3-i TRiP	upd3-i TRiP	upd3-i TRiP	upd3-i GD	upd3-i GD	upd3-i GD
	339	525	410	516	506	468	574	437	452	331	390	292	427	465	567			603	669	472	631	644	656	603	614	584	573	479	310	679	686	692
	211	470	428	499	415	431	409	343	201	480	496	508	446	568	536			482	531	561	585	606	484	563	567	355	608	598	614	621	655	596
	199	363	295	218	384	418	688	480	368	370	590	489	566	568	550			412	532	607	538	621	520	647	608	396	590	619	511	652	679	581
	263	478	500	438	445	467	457	455	419	463	419	424	480	518	423			460	589	587	593	545	558	676	674	648	630	622	555	693	623	563
	299	449	530	384	455	397	231	331	89	488	536	592	391	459	444			503	566	604	645	614	625	482	314	618	650	565	589	663	706	699
	365	526	445	437	430	507	430	447	393	286	329	271	395	408	579			582	631	466	661	600	678	626	621	583	526	556	414	687	699	687
	297	430	574	483	431	448	467	417	495	481	522	530	593	620	656			625	657	555	658	625	622	500	638	583	633	598	573	697	700	687
	375	402	495	429	454	294	468	482	529	286	297	402	629	624	464			666	495	588	618	652	521	561	657	619	583	578	567	677	635	700
	369	563	409	306	398	456	436	528	505	343	435	462	371	523	500			532	641	443	553	633	677	529	506	548	473	489	556	698	687	638
	188	451	477	319	491	393	362	244	151	416	584	389	554	591	354			555	583	553	605	616	488	471	457	224	585	648	541	670	677	466
	229	451	491	499	453	527	443	437	461	415	442	368	460	448	511			421	511	508	596	644	551	557	575	471	624	624	220	689	697	666
	565	435	308	312	437	508	379	258	325	684	348	548	393	358	458			486	600	554	568	519	678	606	434	400	685	560	467	465	618	654
	294	453	289	334	529	615	364	411	421	345	493	360	428	507	672			607	686	284	630	610	694	666	612	258	635	459	559	674	688	672
	189	474	355	321	401	379	374	315	250	350	352	379	427	419	513			589	569	620	576	655	550	655	396	486	580	603	534	646	588	697
	293	354	417	527	604	587	360	437	420	244	394	471	479	580	435			582	629	654	658	649	585	572	449	550	582	531	595	659	644	548
	447	375	426	483	439	447	461	289	369	382	461	500	520	494	428			376	280	690	580	583	536	596	427	226	591	644	552	668	698	651
	475	372	519	465	465	478	356	565	533	371	351	322	350	455	526			613	586	415	635	618	542	465	680	632	632	439	599	644	675	633
	317	401	483	495	440	478	524	418	333	614	314	343	533	499	641			670	670	649	622	587	628	613	683	647	633	514	330	692	640	632
	243	431	373	413	376	399	349	462	391	348	472	362	517	472	661			567	292	642	643	648	572	675	649	538	647	620	603	647	641	690
	239	507	505	413	502		379	617	512	210	462	519	557	665	447			268	395	604	678	650		587	619	567	565	585	563	667	589	680
	340	441	476	421	494		522	518	445	449	387		389	622	279			522	636	515	658	674		633	687	592	570	422		684	692	217
	351	416	554				328	618	553	420	607		201	402	443			663	656	571				683	707	678	636	709		652	674	705
	259	461	375				653	515	540	283	403		545	346	470			534	500	433				656	697	676	530	415		680	614	620
	353	429	467				554	408	315	397	415		639	480	457			563	465	524				498	518	91	651	488		637	646	657
	279	477	460				284	466	447	474	285		483	509	607			598	652	690				606	619	559	662	361		614	697	682
	240	404					161	460	566	398	550		617	561				532	562	446				560	694	688	609	664		683	683
	381	339					249	453	417	270				542				555	603					596	616	598	619				680
	253	456					436	612	442	228								536	483					662	682	687	604
	534						402	415	363	399								527	529					683	661	571	520
	273						456	574	429															636	677	634
							337	365	169															677	645	281
	f: Sleep pattern
	Bin (hours)	AstC Gut>																																AstC Gut>upd2-i SH
	0.25	0	0	0	0	0	0.2	0	0	0	0	0	0	0	0	0	0	0	0	0	0	0	0	0	0	0	0	0.16667	0	0	0	0	0	0.43333	0.76667	0.16667	0	0	0.5	0	0.5	0.2	0.43333	0.46667	0.033333	0	0	0.56667	0
	0.75	0	0	0	0	0	0	0	0	0	0	0	0	0	0	0	0	0	0	0	0.16667	0	0	0	0	0	0	0	0	0	0	0	0	0.16667	0.6	0	0.23333	0	0.26667	0	0.56667	0.2	0	0.7	0.16667	0.2	0	0.2	0.16667
	1.25	0	0	0	0	0	0	0	0	0	0	0	0	0	0	0	0	0	0	0	0.2	0	0	0	0	0	0	0.2	0	0	0	0	0	0.066667	0.33333	0.33333	0	0	0.46667	0	0.1	0	0	0.73333	0	0	0	0.43333	0
	1.75	0	0	0.16667	0	0	0	0	0	0	0.2	0	0	0	0	0	0	0	0	0	0.3	0	0	0	0.16667	0	0	0.2	0	0	0	0	0	0.1	0.16667	0	0	0	0.2	0	0.5	0.66667	0	0.63333	0	0	0.26667	0.46667	0
	2.25	0	0	0	0	0	0	0	0	0	0	0	0	0.1	0	0	0	0	0	0	0.23333	0	0	0	0	0	0	0.36667	0	0	0	0	0	0.13333	0	0.4	0.1	0	0.46667	0.2	0.56667	0.5	0.4	0.96667	0	0.36667	0	0.4	0.066667
	2.75	0	0	0	0.16667	0	0	0	0	0	0	0	0	0.16667	0.16667	0	0	0	0	0	0.26667	0	0	0.16667	0	0	0	0.16667	0	0	0	0	0	0.16667	0.066667	0.63333	0.33333	0	0.53333	0	0.66667	0.56667	0.3	1	0	0	0	0.8	0.7
	3.25	0.2	0	0.1	0	0	0	0	0	0	0	0	0	0.1	0	0	0.16667	0	0	0	0.5	0.2	0	0.2	0	0	0	0	0	0	0	0	0	0.43333	0.1	0.46667	0.033333	0	0	0.33333	0.56667	0.46667	0.36667	0.8	0.36667	0	0	0.23333	0.16667
	3.75	0	0	0.13333	0.43333	0	0	0	0	0	0	0	0	0.3	0.16667	0	0	0	0	0.23333	0.43333	0.16667	0	0	0.13333	0	0	0.23333	0	0	0	0	0	0.56667	0.53333	0.46667	0	0	0.46667	0.4	0.96667	0.76667	0.16667	0.66667	0.16667	0.2	0	0.93333	0.2
	4.25	0	0	0.2	0	0.066667	0.16667	0	0	0	0	0	0.16667	0.8	0.33333	0.066667	0.16667	0.066667	0	0	0	0	0	0.23333	0.23333	0	0	0.16667	0.16667	0	0	0	0	0.53333	0.53333	0.7	0.2	0	0.63333	0	0.23333	0.66667	0	0.83333	0.2	0	0.066667	0.36667	0.5
	4.75	0	0	0.16667	0.16667	0.16667	0	0	0	0.4	0	0	0.43333	0.9	0.3	0.3	0	0.13333	0	0	0.16667	0	0	0	0.066667	0.16667	0	0	0.33333	0	0	0	0	0.6	0.066667	0.7	0.033333	0	0.56667	0.16667	0.7	0.53333	0.2	0.93333	0	0	0.36667	0.96667	0.53333
	5.25	0	0.2	0.26667	0.2	0.16667	0	0	0.16667	0.26667	0.2	0	0.23333	0.8	0.73333	0.6	0	0.36667	0	0.16667	0.066667	0.13333	0	0.4	0.066667	0.26667	0.4	0.16667	0.2	0	0	0	0	0.8	0	0.66667	0.86667	0.26667	0.63333	0.2	1	1	0.83333	1	0	0.23333	0.23333	0.83333	1
	5.75	0	0	0.23333	0.43333	0.3	0.2	0	0	0.13333	0	0	0.46667	0.66667	0.6	0.73333	0	0.13333	0	0	0.7	0.033333	0	0.2	0.36667	0.16667	0.43333	0.63333	0	0.1	0	0	0	0.96667	0.13333	1	0.36667	0	0.4	0.7	1	0.96667	0.63333	1	0	0	0.36667	1	0.86667
	6.25	0.066667	0	0.3	0.8	0.43333	0.16667	0	0.53333	0	0	0	0.36667	0	0.76667	1	0.16667	0.76667	0.16667	0	0.16667	0.2	0.16667	0.033333	0.53333	0.4	0.23333	0.23333	0.46667	0.5	0	0.16667	0	0.66667	0.23333	0.93333	1	0.16667	0.56667	0.1	1	1	1	1	0.23333	0	0.46667	1	1
	6.75	0.1	0	0.9	0	0.16667	0	0	0.7	0.46667	0.33333	0	0.66667	0	0.93333	0.66667	0	0.16667	0	0.26667	0.3	0	0	0.5	0.86667	0.7	0	0.16667	0.066667	0	0.2	0.16667	0	0.7	0.3	0.9	0.4	0.2	0.6	0.63333	1	1	0.3	1	0	0	0.36667	0.66667	1
	7.25	0.43333	0	0.33333	0.63333	0.13333	0.033333	0.2	0.23333	0.2	0	0.36667	0.63333	0.033333	0.86667	1	0.16667	0	0	0.36667	0.96667	0	0	0.23333	0.4	0.23333	0.23333	0.16667	0.16667	0.2	0	0.1	0	0.76667	0.63333	0.83333	0.13333	0.33333	0.36667	0.63333	0.9	0.96667	0.93333	0.83333	0	0.26667	0.13333	0.93333	1
	7.75	0	0	0.96667	0.66667	0.3	0.13333	0.3	0.56667	0	0.16667	0.2	0.43333	0.3	0.26667	1	0.23333	0.16667	0	0.16667	0.36667	0.3	0	0	0.46667	0.43333	0	0.4	0.16667	0.26667	0	0.53333	0.33333	0.83333	0.9	0.9	0.43333	0	0.5	0.23333	0.8	0.9	1	0.9	0	0.33333	0.066667	0.73333	0.63333
	8.25	0	0	1	0.16667	0.36667	0	0	0.76667	0	0.2	0.16667	0	0	0.76667	0.93333	0	0.16667	0	0.16667	0	0.13333	0.16667	0	0.2	0.16667	0	0.46667	0	0.2	0	0.16667	0	0.83333	0.7	0.7	0.2	0	0.033333	0.63333	0.53333	0.9	0.8	1	0.2	0.33333	0.13333	0.93333	0.83333
	8.75	0	0	0.2	0.33333	0.033333	0	0	0.5	0	0	0	0	0	0.033333	0.43333	0.16667	0.066667	0	0.4	0.6	0	0.23333	0	0.43333	0.1	0	0.36667	0.4	0	0	0.23333	0	0.33333	0.63333	0.76667	0.23333	0	0.2	0.6	0.6	0.76667	0	1	0.23333	0	0	0.9	0
	9.25	0	0	0	0.13333	0.16667	0	0.16667	0.66667	0	0	0	0	0	0	0.46667	0	0.13333	0	0.36667	0	0	0.2	0.23333	0.2	0	0	0.23333	0.26667	0	0	0.16667	0.13333	0.4	0.066667	0.16667	0.3	0	0.16667	0.46667	0.26667	0.93333	0.3	0.96667	0	0.2	0.16667	0.66667	0.33333
	9.75	0	0	0.2	0	0	0	0	0.23333	0	0	0	0	0	0	0.16667	0	0	0	0.4	0.16667	0	0	0	0.16667	0	0	0	0	0	0	0.16667	0.033333	0.16667	0	0.36667	0.56667	0.2	0	0.43333	0.16667	0.76667	0.4	1	0	0.23333	0.23333	0.63333	0
	10.25	0	0	0.26667	0	0	0.16667	0	0.13333	0	0	0	0	0	0	0	0.16667	0.3	0	0	0.36667	0	0	0	0.2	0	0	0.16667	0	0	0	0	0	0	0	0	0.16667	0	0.16667	0.16667	0.033333	0.76667	0	1	0	0.23333	0	0.5	0
	10.75	0	0	0.066667	0	0	0.36667	0	0	0	0	0	0	0.16667	0	0	0	0.066667	0	0	0.6	0	0	0	0	0	0	0.066667	0	0.16667	0.16667	0	0	0	0	0	0	0.033333	0.6	0.26667	0.43333	0.36667	0.8	0.9	0.2	0.53333	0	0.033333	0
	11.25	0	0	0	0.23333	0	0.36667	0	0	0	0	0	0	0.16667	0	0	0	0	0	0	0.43333	0	0	0	0	0	0	0.43333	0	0	0	0	0	0	0	0.3	0	0.13333	0.16667	0	0.26667	0	0	0.63333	0.2	0.23333	0	0	0
	11.75	0	0	0	0	0	0	0	0	0	0.26667	0	0	0.5	0	0	0	0	0	0	0.2	0	0	0	0	0	0	0.1	0	0	0	0	0	0	0	0.16667	0	0.16667	0.2	0	0.16667	0	0.033333	0.53333	0	0	0	0	0.6
	12.25	0	0	0.26667	0.36667	0	0.26667	0	0	0	0.1	0.5	0.16667	0.63333	0.3	0	0	0.46667	0	0	0.9	0.63333	0	0	0.13333	0	0.2	0	0	0	0	0.16667	0.5	0.63333	0.73333	0.33333	0.4	0.46667	0	0.36667	0.7	0.16667	0.53333	0.43333	0.63333	0.56667	0.46667	0.53333	0.86667
	12.75	0.23333	0	0.6	0.46667	0.16667	0.33333	0.4	0.16667	0	0	0.73333	0.56667	1	0.83333	0.1	0	1	0	0	0.63333	0.4	0.16667	0	0.96667	0	0	0	0.4	0.23333	0	0	0.43333	0.3	0.76667	0.56667	0.26667	0.43333	0.46667	0.86667	0.93333	0.66667	0	1	0	0.16667	0	0.23333	0.96667
	13.25	0.53333	0	0.56667	0.63333	0.36667	0	0.5	0.66667	0.43333	0	0.8	0.63333	0.63333	1	0.86667	0	1	0.2	0.33333	0.33333	0.43333	0.26667	0.36667	1	0.86667	0.36667	0	0.93333	0.36667	0.86667	0	0.43333	0.7	0.46667	0.23333	0.16667	0.9	0.13333	0.63333	1	1	0.16667	1	0	0.66667	0.16667	0.53333	1
	13.75	0.8	0.66667	0.26667	0.5	0.66667	0.2	1	1	0.43333	0	1	1	0.16667	0.46667	0.9	0.16667	1	0.8	1	0.7	0.43333	0.23333	0.2	1	1	0.033333	0.5	1	0.6	0.8	0.43333	0.43333	0.73333	0.7	0.7	0.2	0.63333	0.53333	0.9	0.8	1	0.66667	1	0.6	0.53333	0	0.66667	0.76667
	14.25	0.96667	0.3	0	1	0.43333	0.6	1	1	0.83333	0	1	0.86667	0.46667	0.83333	1	0.1	1	0.83333	0.96667	0.26667	0.8	0.46667	0.1	1	1	0	0	0.66667	0.5	0.66667	0.7	0.5	0.73333	0.4	1	0.4	0.86667	0.43333	0.7	0.76667	1	0.73333	1	0.6	0.5	0.56667	1	1
	14.75	0.96667	0.66667	0	0.9	0.53333	0.43333	1	1	1	0	1	0.36667	0.43333	0.9	1	0.4	1	0.9	0.6	0	0.86667	0.66667	1	1	1	0	0	0.63333	0.56667	0	0.83333	0.5	0.66667	0.7	0.96667	0.63333	0.23333	0.86667	0.7	0.93333	0.96667	0.96667	1	0.6	0.6	0.33333	0.96667	0.8
	15.25	0.93333	1	0.4	0.93333	0.73333	0.16667	1	1	0.9	0.16667	1	0.86667	0.33333	0.8	0.93333	0.63333	1	0.93333	0.33333	0.4	0.73333	0.33333	1	1	1	0.53333	0	0.9	0.63333	0.2	0.66667	0.93333	0.96667	0.46667	0.93333	0.76667	0.83333	0.73333	0.3	0.93333	0.93333	0.66667	1	0.7	0.8	0.53333	1	0.76667
	15.75	1	1	0.43333	0.86667	0.7	0.2	1	1	0.56667	0.16667	1	0.66667	0.63333	0.93333	1	0.23333	1	0.76667	0.4	0.23333	0.6	0.3	0.83333	1	1	0.56667	0	0	0	0.8	0.76667	0.9	1	0.8	0.93333	0.63333	1	0.83333	0.86667	1	0.8	0.96667	1	0.93333	0.76667	0.66667	0.93333	0.96667
	16.25	0.96667	0.36667	0.23333	0.9	0.86667	0.46667	1	1	0.3	0	1	1	0.3	0.93333	1	0.93333	0.96667	0.93333	0.6	0.73333	0.6	0.2	0.9	1	1	0.066667	0.36667	0.93333	0	0.4	0.73333	0.43333	0.9	0.66667	1	0.63333	1	0.5	0.93333	1	0.93333	0.93333	1	0.86667	0.56667	1	0.7	0.86667
	16.75	0.96667	0.86667	0.86667	0.86667	0.56667	0.7	1	1	0.63333	0	1	0.4	0.7	0.7	0.86667	0.73333	1	0.83333	0.43333	0.36667	0.9	0.53333	0.8	1	1	0	0.066667	1	0.7	0.4	0.66667	0.43333	0.9	0.36667	0.9	0.9	1	0.6	0.6	1	0.6	0.66667	0.96667	0.93333	0.63333	0.8	0.5	0.66667
	17.25	0.86667	0.9	0.26667	0.86667	0.23333	0.83333	1	0.76667	0.76667	0.16667	1	0.93333	0.4	0.93333	0.8	0.3	1	0.73333	0	0.63333	0.23333	0.33333	0.96667	1	1	0	0.8	1	0	0.56667	0.66667	0.76667	0.93333	0.73333	0.96667	1	1	0.73333	0.86667	1	0.63333	0.9	1	0.83333	0.4	0.93333	0.6	0.63333
	17.75	0.9	1	0.63333	0.96667	0	0.73333	1	0.73333	0.26667	0	0.83333	0.86667	0.2	0.9	0.66667	0.26667	1	0.4	0.26667	0.2	0.7	0.26667	0.93333	1	1	0.36667	0.033333	0.53333	0.7	0.36667	0.73333	0.83333	0.96667	0.9	0.93333	1	1	0.8	1	0.56667	0.76667	0.93333	1	1	0.76667	0.86667	0.5	1
	18.25	0.93333	0.8	0.83333	0.53333	0	0.8	1	0.86667	0.16667	0	0.4	0.9	0.83333	0.8	0.066667	0.23333	1	0.8	0.33333	0.8	0.86667	0.8	0.96667	1	1	0.5	0.5	0.8	0.53333	0.7	0.93333	0.63333	0.73333	1	0.96667	1	1	0.9	1	0.86667	0.86667	1	1	0.96667	0.9	1	0.76667	1
	18.75	0.96667	0.8	0.6	0.93333	0	1	1	0.83333	0.16667	0	0.53333	0.46667	0.7	0.6	0.3	0.86667	1	0.46667	0.16667	0.43333	0.66667	0.53333	0.96667	1	1	0.7	0.53333	0.53333	0.63333	0.53333	0.63333	0.53333	1	0.5	0.93333	1	1	0.93333	0.83333	1	0.8	1	1	0.96667	1	0.5	0.76667	1
	19.25	0.96667	0.53333	0.86667	0.96667	0	0.76667	1	0.36667	0.83333	0	0.83333	0.83333	0.83333	1	0.16667	0.4	1	0.56667	0.16667	0.86667	0.86667	0.9	1	1	0.96667	0.7	0.26667	0.46667	0.76667	1	0.7	0.93333	0.93333	0.93333	0.96667	1	1	1	0.73333	1	0.86667	1	1	1	1	1	0.73333	1
	19.75	0.93333	0.93333	0.73333	0.66667	0.2	0.73333	1	0.1	0.33333	0	0.83333	0.9	0.83333	0.43333	0	0.5	0.86667	0.36667	0.53333	0.9	0.46667	0.9	0.83333	1	0.53333	0.16667	0.4	0	0.3	0.43333	0.73333	0.8	1	0.86667	0.96667	1	1	1	0.9	1	0.93333	1	1	1	1	1	0.66667	1
	20.25	0.96667	0.83333	1	0.8	0.2	0.83333	0.66667	0.9	0	0	0.9	0.83333	0.83333	0.63333	0.43333	0.16667	0.63333	0.16667	0.43333	0.86667	0.96667	0.6	0.86667	1	0.7	0.73333	0.33333	0	0.66667	0.86667	0.26667	0.93333	1	0.93333	0.96667	1	1	0.7	1	1	1	1	1	0.63333	1	1	0.8	0.93333
	20.75	0.9	0.46667	0.33333	0.73333	0	0.76667	0	0.16667	0.2	0.2	0.73333	0	0.96667	0.83333	0.43333	0.46667	0.2	0	0.16667	0.6	0.93333	0.36667	1	1	0.43333	0.66667	0.26667	0	0.46667	0.53333	0.63333	0.63333	1	1	1	1	1	0.93333	0.7	0.96667	0.96667	1	1	0.9	0.86667	1	0.76667	1
	21.25	0.73333	0	1	0.73333	0.2	1	0.1	0.7	0.16667	0.16667	0.33333	0.73333	0.5	0.56667	0.13333	0.2	0.23333	0	0.033333	0.76667	1	1	0.7	1	0	0.83333	0.63333	0.23333	0.86667	0.53333	0.23333	0.76667	1	0.86667	0.83333	1	1	1	0.9	1	0.93333	1	0.73333	0.93333	0.83333	1	0.83333	1
	21.75	0.3	0	1	0.4	0	0.96667	0.2	0.66667	0.23333	0.2	0.26667	0.4	0.76667	0.63333	0.56667	0.4	0.16667	0	0.5	1	0.9	0.6	1	0.66667	0.63333	0.86667	0.16667	0.1	0.7	0.86667	0.16667	0.73333	1	0.63333	1	1	1	1	1	1	1	1	0.93333	0.63333	0.66667	1	0.93333	0.8
	22.25	0	0.4	0.2	0.56667	0.2	0.7	1	0.73333	0.36667	0.2	0.63333	0.66667	1	1	0.6	0.5	0.53333	0	0.36667	0.73333	0.56667	0.6	1	0.1	0.26667	0.33333	0.96667	0.6	0.7	0.5	0.96667	1	1	0.83333	0.96667	1	0.76667	1	1	1	1	1	0.96667	0.73333	1	1	0.66667	1
	22.75	0	0.13333	0.5	0.4	0	0.96667	0.033333	0	0	0	0	0.76667	0.66667	0.63333	0	0.4	0.23333	0	0.23333	0.76667	0.1	0.56667	0.93333	0.36667	0	0.36667	0.43333	0.16667	0.46667	0.33333	0.3	0.066667	1	0.73333	0.26667	1	0.6	0.8	0.9	0.93333	0.8	0.73333	1	0.9	0.56667	1	0.6	1
	23.25	0	0	0	0.53333	0	0.56667	0.3	0.2	0	0	0	0	0.56667	0.16667	0	0	0	0	0.16667	0.6	0.36667	0.56667	0	0.2	0.2	0.4	0.16667	0	0.16667	0.4	0	0.26667	0.8	0.46667	0.7	0.8	0.4	0.9	0.9	0.7	0.7	0.56667	0.86667	0.53333	0.26667	0.73333	0.56667	0.56667
	23.75	0	0	0	0	0	0	0	0	0	0	0	0	0	0	0	0.16667	0	0	0	0	0	0	0	0.2	0	0	0	0	0	0	0	0	0.63333	0	0	0.56667	0	0.36667	0	0.43333	0.33333	0	0.83333	0	0.16667	0.033333	0.3	0.36667
	24.25	0.76667	0.43333	0.5	0.7	0.33333	0.56667	0.73333	0.5	0.96667	0.4	0.96667	0.36667	0.56667	0.5	0.43333	0.36667	0.6	0.66667	0.66667	0.36667	0.6	0.8	0.66667	0.5	0.86667	0.36667	0.5	0.33333	0.5	0.53333	0.5	0.36667	0.5	0.3	0.3	0.3	0.26667	0.3	0.33333	0.26667	0.26667	0.26667	0.76667	0.3	0.3	0.3	0.43333	0.26667
	24.75	0.3	0.46667	0	0	0	0.1	0.96667	0	1	0	0.13333	0	0	0	0	0.23333	0.5	0	0	0	0.16667	0	0.3	0.33333	0.6	0	0.7	0.53333	0.066667	0.26667	0.13333	0	0.46667	0	0	0.23333	0	0.26667	0	0	0.4	0	0.33333	0	0.13333	0	0.43333	0
	25.25	0.7	0.9	0.16667	0	0	0.066667	0.7	0	0.7	0.3	0	0	0.43333	0.23333	0.2	0.033333	0.73333	0.23333	0.033333	0.13333	0	0	0.033333	0.033333	0.86667	0	0	0	0	0.46667	0.26667	0.16667	0	0	0	0.16667	0	0.033333	0	0.16667	0.73333	0	1	0	0.6	0	0	0
	25.75	0.56667	0.7	0	0.33333	0.16667	0	0.76667	0	1	0.66667	0.5	0.36667	0.13333	0.53333	0	0.13333	0.7	0.56667	0.13333	0.13333	0.53333	0	0	1	0.63333	0	0.7	0.2	0.16667	0.4	0.3	0.16667	0	0	0.13333	0.16667	0	0.16667	0.23333	0.36667	0.23333	0	0.53333	0	0.1	0	0	0
	26.25	0.26667	0.43333	0	0.83333	0	0	0.5	0.23333	0.96667	0.5	0.86667	0	0.43333	0.53333	0.5	0.4	0.86667	0.26667	0.9	0.33333	0.033333	0.46667	0.16667	1	0.6	0	0.46667	0.43333	0.033333	0.6	0	0.16667	0	0	0.2	0.23333	0	0.53333	0.16667	0.5	0.76667	0	0.63333	0	0.16667	0	0	0
	26.75	0.6	0.73333	0.66667	0	0.46667	0	1	0.53333	0.96667	0.4	0.36667	0.23333	0.3	0.8	0.46667	0.43333	0.96667	1	0.43333	0.56667	0.6	0.36667	0.3	0.6	0.43333	0	0.76667	0.1	0.16667	0.56667	0.56667	0.33333	0.16667	0	0	0.36667	0	0.16667	0.53333	0.23333	0.5	0.16667	0.86667	0	0	0	0.23333	0
	27.25	0.46667	0.9	0.033333	0.56667	0	0	0.63333	0.16667	0.9	0.56667	0.16667	0	0.8	0.2	0.16667	0.2	0.36667	0.43333	0.33333	0.5	0.4	0	0.66667	0	0.7	0	0.7	0.033333	0	0.46667	0.36667	0.3	0	0	0	0.2	0	0.43333	0.033333	0.23333	1	0.3	0.46667	0.16667	0.1	0	0.2	0.066667
	27.75	0.5	0.7	0.6	0.53333	0.3	0.33333	0.73333	0.23333	0.73333	0.2	0.73333	0	0.6	0.76667	0.63333	0.73333	0.8	1	0.63333	1	0.43333	0.13333	0.4	0	1	0	0.53333	0.76667	0.56667	0.46667	0	0.36667	0.1	0.16667	0.56667	0.26667	0	0.36667	0.23333	0.66667	0.66667	0.16667	0.36667	0	0.066667	0.23333	0	1
	28.25	0.56667	0.76667	0.63333	0.36667	0.3	0.16667	0.3	0.56667	0.83333	0.53333	0.26667	0.46667	0.6	0.56667	0.26667	0.2	0.83333	1	0.2	0.3	0.76667	0.5	0.86667	0.56667	0.2	0	0.73333	0.66667	0.7	0.43333	0.36667	0.33333	0.56667	0.1	0.2	0.13333	0	0.33333	0.36667	0.8	1	0.13333	0.46667	0	0.26667	0.033333	0.033333	0
	28.75	0.46667	0.8	0.8	0.2	0.46667	0	0.93333	0.4	1	0.13333	0.53333	0.36667	0.46667	0.5	0.43333	0.56667	0.9	1	0.63333	0.66667	0.23333	0.23333	0.9	0	1	0	0.7	0.4	0.5	0.63333	0.16667	0.9	0.43333	0.16667	0.3	0.46667	0.56667	0.033333	0.23333	0.36667	1	0.26667	0.36667	0	0.16667	0.73333	0.16667	0.4
	29.25	0.76667	0.56667	0.6	0.3	0	0.033333	0.33333	0.43333	0.8	0.26667	0.33333	0.26667	0.8	0.2	0.13333	0.63333	0.73333	1	0.6	0.9	0.8	1	0.86667	0.36667	1	0.26667	0.4	0.23333	0.36667	0.66667	0.13333	0.76667	0.86667	0.26667	0.43333	0.36667	0	0.3	0.53333	1	1	0.53333	0.43333	0.26667	0.36667	0.33333	0.16667	0.46667
	29.75	0.66667	1	0.66667	0.76667	0.6	0.33333	1	0.83333	0.93333	0.66667	0.96667	0.23333	0.96667	0.43333	0.4	0.46667	1	1	0.6	0.33333	0.2	0.8	0.63333	0.46667	1	0.16667	0.9	0.66667	0.33333	0.5	0.33333	0.46667	0.5	0.26667	0	0.73333	0	0.46667	0.3	0.66667	0.7	0.23333	0.2	0	0.066667	0.26667	0	0.73333
	30.25	0.83333	0.86667	0.66667	0.73333	0.43333	0	0.5	0.96667	0.96667	0.066667	0.16667	0.16667	0.83333	1	0.6	0.4	0.8	0.4	0.93333	0.6	0.96667	0.86667	0.96667	0.86667	0.53333	0	0.8	0.56667	0.26667	0.4	0.36667	0.33333	0.76667	0.1	0.83333	0.6	0.23333	0.3	0.16667	0.86667	1	0	0.83333	0	0.5	0.36667	0.16667	0.13333
	30.75	0.76667	0.96667	0.5	0.36667	0.96667	0.16667	0.63333	0.93333	0.83333	0.56667	0.63333	0.26667	0.76667	0.63333	0.86667	1	0.66667	0.93333	0.96667	0.63333	0.9	0.066667	0.86667	0.56667	0.83333	0.2	0.83333	0.73333	0.46667	0.63333	0.16667	0.16667	0.33333	0.066667	0.83333	0.16667	0	0.2	0	0.96667	0.83333	0.36667	1	0.2	0.2	0.1	0.2	1
	31.25	0.9	0.76667	0.46667	0.86667	0.73333	0.46667	0.93333	1	0.7	0.46667	0.66667	0	0.46667	0.23333	0.4	0.7	0.86667	0.3	0.7	0.56667	0.8	0.9	1	0.66667	1	0	0.86667	0.7	0.33333	0.33333	0.2	0.66667	0.86667	0	0.4	0.5	0.33333	0.23333	0.4	0.53333	1	0.36667	1	0	0.5	0.3	0.5	0.73333
	31.75	0.63333	0.7	0.33333	0.53333	0.6	0.1	0.6	0.93333	1	0.56667	0.6	0.66667	0.8	0.9	0.7	0.73333	0.93333	1	0.96667	0.3	0.63333	1	0.96667	0.7	1	0.33333	0.4	0.83333	0.46667	0.23333	0.16667	0.43333	0.46667	0	0.23333	0.26667	0.033333	0.53333	0.86667	0.63333	0.53333	0.2	0.76667	0	0.73333	0	0.53333	0.96667
	32.25	0.73333	0.96667	0.7	0.7	0.63333	0.36667	0.4	0.9	1	0.066667	0.56667	0.16667	0.76667	0.66667	0.4	0.43333	0.76667	0.96667	0.76667	0.46667	0.4	0.46667	0.9	0.36667	0.7	0.3	1	0.43333	0.2	0.76667	0.63333	0.63333	0.23333	0	0.36667	0.83333	0	0.26667	0.4	1	0.6	0.23333	0.66667	0	0.26667	0.066667	0	0.66667
	32.75	0.46667	0.83333	0.56667	1	0	0.3	0.83333	0.46667	1	0.46667	0.7	0.46667	0.66667	0.6	0.9	0.5	0.86667	0.46667	0.46667	0	1	0.86667	0.56667	0.93333	0.43333	0	0.63333	0.83333	0.6	0.33333	0.53333	0.46667	0.36667	0	0.13333	0.16667	0	0.16667	0.5	0.73333	0.83333	0.53333	0.83333	0	0.2	0.1	0	0.5
	33.25	0.73333	0.7	0.2	0.46667	0.46667	0.46667	0.93333	0.36667	0.9	0.66667	0.53333	0	0.4	0.4	0.4	0.26667	1	0.7	0.46667	0.73333	0.93333	0.66667	0.93333	0.16667	1	0.066667	0.83333	0.53333	0.7	0.26667	0.3	0.33333	0.16667	0	0.13333	0.73333	0	0	0.43333	0.43333	0.56667	0	0.9	0.16667	0.3	0.53333	0	0.23333
	33.75	0.6	0	0.1	0.2	0.066667	0.2	1	0.2	0.8	0.16667	0.96667	0	0.5	0.56667	0.26667	0.2	0.73333	0.7	0.6	0.23333	0.66667	0.8	1	0.4	0.9	0.16667	0.56667	0.26667	0.56667	0.2	0	0.33333	0.033333	0	0	0.16667	0	0.7	0	0.6	0.1	0.4	0.56667	0	0.16667	0.066667	0	0.7
	34.25	0.56667	0	0.13333	0	0.2	0.6	0.9	0	0.83333	0.33333	0.36667	0.33333	0	0	0.033333	0	0.16667	0	0.5	0.5	0.7	0.033333	0.83333	0.56667	0.7	0.16667	0.56667	0.33333	0.33333	0.6	0.4	0.2	0.16667	0	0.46667	0.43333	0	0.23333	0.36667	0.5	0.23333	0.2	0.53333	0	0	0.33333	0	0.3
	34.75	0.16667	0	0.33333	0	0	0.4	0.83333	0.23333	1	0.43333	0.6	0.63333	0.26667	0.43333	0.5	0	0.9	0.26667	0	0	0.5	0	0.73333	0.26667	0.66667	0.16667	0.43333	0	0.36667	0.33333	0	0.3	0	0.033333	0	0	0	0.66667	0.23333	0.46667	0	0.2	0.4	0.16667	0.16667	0.26667	0	0.5
	35.25	0	0.33333	0	0	0	0	0.63333	0.3	0.96667	0.4	0.36667	0.33333	0.36667	0.2	0.066667	0.73333	0.56667	0.76667	0.16667	0.16667	0.5	0.43333	0	0.16667	0.36667	0.2	0.033333	0	0.2	0.4	0.5	0	0.16667	0.36667	0	0	0	0.33333	0	0	0.4	0.066667	0.2	0	0.23333	0.16667	0	0.26667
	35.75	0.1	0.3	0	0.43333	0.26667	0	0.5	0.7	0.86667	0.2	0.066667	0	0.26667	0.13333	0.43333	0	0.2	0	0.43333	0	0.93333	0.16667	0.43333	0.16667	0.43333	0	0	0.16667	0	0.3	0.3	0	0	0	0.26667	0.46667	0	0.3	0.16667	0.23333	0.23333	0.53333	0.16667	0.33333	0.16667	0.16667	0	0.23333
	36.25	0.9	0.46667	0.73333	0.4	0.43333	0	0.53333	0.5	0.63333	0	0.53333	0.53333	0.96667	0.46667	0.73333	0.46667	0.86667	0.73333	0.46667	0.76667	0.73333	0.86667	0.9	0.83333	1	0.066667	0.76667	0.76667	0.63333	0.43333	0	0.66667	0.7	0.53333	0.66667	0.56667	0.53333	0.63333	0.43333	0.83333	0.76667	0.46667	0.46667	0	0.86667	0.8	0.63333	0.86667
	36.75	1	0.4	1	1	1	0.73333	0.96667	0.76667	1	0.36667	1	0.96667	0.96667	1	1	1	0.5	1	1	0.96667	0.66667	1	1	1	0.86667	0.96667	1	1	0.96667	0.83333	0.66667	1	0.43333	0.56667	0.53333	0.73333	0.5	0.3	0.53333	1	1	0.63333	0.83333	0.16667	0.43333	0.63333	0.83333	1
	37.25	1	0.26667	1	1	1	0.73333	0.96667	0.86667	1	0.63333	1	1	1	1	0.93333	1	0.96667	1	1	0.93333	1	1	1	1	0.9	1	1	1	1	0.86667	0.86667	1	1	1	0.46667	0.86667	0.76667	0.96667	0.9	1	1	1	0.83333	0.76667	0.83333	0.96667	1	1
	37.75	1	1	1	1	1	0.96667	1	1	1	1	1	1	1	1	1	1	1	1	1	0.96667	1	1	1	1	1	1	1	1	1	1	1	1	1	1	1	0.96667	0.96667	0.83333	1	1	1	1	0.9	0.76667	0.76667	0.96667	0.73333	1
	38.25	1	0.96667	1	1	1	0.76667	1	1	1	0.96667	1	1	1	1	0.8	1	1	1	1	1	1	1	1	1	1	1	1	1	1	1	0.86667	1	1	0.76667	1	0.93333	1	0.93333	0.93333	1	1	1	0.66667	0.83333	1	0.76667	1	1
	38.75	1	1	1	1	1	1	1	1	1	1	1	1	1	1	0.96667	1	1	1	1	1	1	1	1	1	1	1	1	1	1	1	0.93333	1	1	0.96667	1	0.9	1	0.96667	0.8	1	1	0.96667	0.8	0.7	0.96667	1	0.53333	1
	39.25	1	0.83333	1	1	1	1	1	1	1	1	1	1	1	1	0.93333	1	1	1	1	0.96667	1	1	1	1	1	1	1	1	1	1	1	1	1	0.9	0.53333	0.8	1	0.83333	0.76667	1	1	0.96667	1	0.86667	0.76667	1	0.93333	1
	39.75	1	0.7	1	1	1	1	1	1	1	1	1	1	1	1	0.93333	1	1	1	0.96667	0.96667	1	1	1	1	1	0.96667	1	1	1	1	1	1	1	0.53333	0.93333	0.8	1	0.93333	0.93333	1	0.7	1	1	0.56667	0.9	1	0.73333	1
	40.25	1	0.96667	1	1	1	1	1	1	1	1	1	1	1	1	1	1	1	1	1	1	1	1	1	1	1	0.93333	1	1	1	1	1	1	1	0.83333	1	0.9	0.46667	1	0.7	1	1	1	0.86667	0.76667	0.66667	1	0.8	1
	40.75	1	1	1	1	1	1	1	1	1	1	1	1	1	1	0.93333	1	1	1	1	1	1	1	1	1	1	1	1	1	1	0.93333	1	1	1	1	0.93333	0.8	0.7	1	1	1	0.96667	1	1	1	0.93333	0.9	0.83333	1
	41.25	1	1	0.9	1	1	0.96667	1	1	0.93333	1	0.93333	1	1	1	0.9	1	0.96667	1	1	0.96667	1	1	1	0.73333	1	0.96667	1	1	1	1	1	1	1	0.96667	0.96667	0.8	0.96667	1	0.7	1	0.63333	1	0.66667	1	1	0.73333	0.93333	1
	41.75	1	0.83333	1	1	1	1	1	0.96667	1	0.96667	1	1	1	1	1	1	1	1	0.96667	0.73333	1	1	1	1	1	0.8	1	1	1	1	1	1	1	0.66667	0.9	1	1	1	0.86667	1	0.83333	1	0.96667	1	1	0.7	0.86667	1
	42.25	1	0.96667	0.9	1	1	0.9	1	1	1	0.93333	1	1	1	1	1	1	0.96667	1	1	0.86667	1	0.86667	1	0.93333	1	0.76667	1	1	1	1	1	1	1	0.96667	1	1	1	1	1	0.53333	0.93333	1	0.93333	0.63333	1	0.9	0.86667	1
	42.75	1	1	1	0.96667	1	0.86667	1	1	0.96667	0.9	1	1	1	1	1	1	1	1	0.86667	0.9	1	1	1	0.83333	1	1	1	1	1	1	1	1	1	0.66667	1	1	1	0.73333	0.9	1	0.8	1	0.8	0.93333	0.73333	0.96667	0.9	1
	43.25	1	1	0.66667	1	1	0.96667	1	0.8	1	1	1	1	0.8	1	1	1	1	1	1	1	1	1	1	1	1	1	1	1	1	1	1	1	1	0.93333	1	1	1	1	0.86667	0.96667	1	1	1	1	1	1	0.9	1
	43.75	1	0.76667	0.86667	1	1	0.86667	1	0.96667	1	1	0.96667	1	0.96667	1	1	1	0.96667	1	1	0.93333	1	0.9	1	1	1	0.93333	1	1	1	1	0.8	1	1	0.6	1	1	0.56667	1	0.8	1	1	1	0.9	0.86667	1	0.83333	0.93333	1
	44.25	1	0.86667	0.96667	1	1	0.96667	1	0.96667	1	1	0.96667	1	0.96667	1	0.83333	1	1	1	0.96667	0.96667	1	0.9	1	0.8	1	1	0.9	1	1	1	1	1	1	0.83333	0.8	1	0.86667	0.76667	0.96667	1	1	1	1	1	0.8	0.93333	0.86667	1
	44.75	1	0.96667	1	1	1	0.66667	1	1	1	1	0.96667	1	0.73333	1	1	1	1	1	1	1	1	0.8	1	1	1	1	1	1	1	1	0.86667	1	1	1	0.9	0.73333	0.96667	0.9	0.96667	1	1	1	0.73333	0.83333	0.73333	1	0.53333	0.96667
	45.25	1	1	0.96667	1	1	1	1	0.96667	1	1	0.96667	1	1	1	1	1	1	1	1	1	1	0.86667	1	0.96667	1	0.86667	1	1	1	1	1	1	0.63333	0.7	1	0.86667	0.83333	1	1	0.7	0.56667	0.46667	1	0.93333	0.8	0.9	0.76667	0.7
	45.75	1	0.96667	1	0.9	0.83333	0.96667	1	1	1	0.83333	1	1	1	1	1	1	1	1	0.53333	1	1	1	1	1	1	1	1	1	1	1	0.96667	1	1	1	0.93333	0.93333	1	1	1	1	1	1	1	0.73333	0.73333	0.96667	1	0.86667
	46.25	1	1	0.83333	1	1	1	1	1	1	0.93333	1	1	1	1	0.93333	1	1	1	1	1	1	1	1	0.96667	1	1	1	1	0.9	1	1	1	1	0.6	1	1	1	0.83333	1	1	1	1	1	1	0.73333	0.9	0.36667	1
	46.75	1	0.9	1	1	1	0.76667	1	1	0.8	0.7	1	0.73333	0.83333	1	0.96667	1	1	1	1	1	1	1	1	0.8	1	0.8	1	1	1	1	1	1	0.96667	1	0.86667	0.93333	1	0.9	0.96667	1	1	0.9	0.86667	0.83333	0.96667	0.8	1	0.56667
	47.25	1	0.16667	1	1	1	0.96667	1	1	1	0.96667	0.96667	1	1	1	1	1	1	1	1	1	1	1	1	1	1	1	1	1	1	1	0.96667	1	0.8	0.66667	0.96667	0.9	0.9	0.63333	0.9	1	0.63333	0.73333	0.83333	1	0.7	0.86667	1	0.83333
	47.75	1	0.6	1	1	1	1	1	1	1	0.8	0.96667	1	1	1	0.86667	1	1	1	1	1	1	0.9	1	1	1	0.96667	1	1	1	0.96667	0.96667	1	0.76667	0.43333	0.46667	0.66667	0.53333	0.73333	0.76667	0.63333	0.4	0.2	0.66667	0.3	0.86667	0.53333	0.53333	0.63333
	g: Day Sleep								h: Night sleep								i: Survival on oxidative stress
	AstC Gut>	Day 1 normal food		Day2 on 1%H2O2					AstC Gut>	Night1 normal food		Night2 on 1%H2O2
	Day 1	Day2	Day 1	Day2	Day 1	Day2			Day 1	Day2	Day 1	Day2	Day 1	Day2
	w1118	w1118	upd2-i SH	upd2-i SH	upd3-i KK	upd3-i KK			w1118	w1118	upd2-i SH	upd2-i SH	upd3-i KK	upd3-i KK			w1118	upd2-i SH	upd3-i KK	upd3-i GD
	24	394	290	215	19	33			475	719	616	669	617	683			177.483	90.6	89.95	60.7833
	6	445	203	55	27	46			350	589	494	574	551	547			72.2667	144.217	154	84.8833
	165	260	347	174	230	351			348	686	571	626	569	603			90.5167	85.1833	54.0667	50.65
	131	297	168	239	448	193			496	699	551	633	574	556			162.9	88.4	106.6	71.4
	69	210	45	43	118	202			182	700	574	617	437	611			4.33333	70.1333	38.7	71.1167
	54	140	261	220	250	200			421	634	516	627	506	556			126.467	76.3667	82.9667	63.5333
	20	519	185	195	39	99			486	706	558	621	597	657			65.9	85.1833	95.25	71.2
	135	327	406	367	105	91			446	686	646	680	500	565			55.7667	45.9167	55.3333	116.783
	44	650	447	438	133	49			258	701	590	637	590	661			70.1667	33.4	64.2667	110.583
	41	271	267	155	178	300			42	631	554	640	690	679			122.017	75.0833	41.7333	24.4
	22	362	60	429	328	237			490	699	684	622	572	649			64.4	68.0167	50.5	85.2
	102	160	101	48	202	150			445	698	507	556	654	672			93.45	59.6333	41.2667	2.51667
	150	366	86	173	90	51			432	698	487	606	253	325			20.5667	116.017	96.3667	55.35
	178	331	426	131	131	23			505	706	498	633	421	470			47.65	124.5	51.4833	105.867
	221	276	288	92	61	37			355	683	498	585	594	574			65.5333	46.8333	101.533	70.1333
	37	281	238	275	5	81			242	705	630	673	487	576			50.35	61.6833	116.567	65.3333
	76	524	126	82	332	295			519	698	661	622	702	707			116.717	53.3	63.85	123.967
	5	440	216	82	163	43			291	713	494	548	392	505			142.7	63.4167	69.5833	3.73333
	76	364	98	333	66	80			241	684	633	640	587	702			37.75	72.5667	60.8333	62.7667
	216	283	505	115	248	187			412	689	683	685	583	644			96.9833	56.55	75.4833	48.2667
	35	411	187	494	178	351			451	704	650	690	609	551			84.7667	24.2167	125.6	120.217
	23	317	422	68	123	41			336	695	463	629	550	607			82.3333		54.5667	128.567
	66	450	383	383	82	110			491	718	620	676	420	681			41.55		98.95	95.35
	135	321	362	230	292	369			589	688	460	624	654	680			52.9		80.9833	13.4167
	79	524	288	196	282	155			468	714	599	568	389	598			78.15		99.2333	4.36667
	39	72	262	377	574	32			252	662	561	616	639	565			52.85		98.0167	42.7667
	153	422	146	147	108	235			193	711	578	619	587	563			56.0667		53.9167	36.2167
	67	293	362	201	183	151			327	714	612	647	574	680			37.65		82.5833	24.5667
	43	237	192	399	437	463			317	706	526	614	601	671			63.7667		51.7	57.25
	11	324	353	236	161	136			353	693	691	664	698	684
	51	201		67	154	289			358	658	617	678	463	657
	15	246			168	133			432	711			487	538
	j: Sleep pattern
	Bin (hours)	w1118
	0.25	3.5	4	0	0	5	4	2.5	3	7.5	2.5	1.00001	0	0	6.5	0	2.5	9	3	0	3	0	2.5	3.5	0	0	0	0	3.5	0	6.5	0	5.00001	0	0	0	14	0	0	5	0	0	0	0	0	0	0	0	7
	0.75	6	15	0	0	0	0	0	0	20	9	6.5	0	7.5	0	0	0	1.00001	0	0	5	4.5	0	2.5	0	0	0	6	3.5	0	4	0	1.5	7	0	5	28	0	0	4	0	0	0	0	0	4	0	6	0
	1.25	1.5	6.5	2.5	0	5	0	0	3.5	28	8	3.5	0	6.99999	0	0	2.5	5.5	0	2.5	10.5	9.5	0	10.5	0	3	0	3	0	0	4	3.5	2.5	6	5	0	3	8	0	11	0	7	0	6	0	1	0	14	0
	1.75	9.99999	0	0	0	6.5	0	2.5	11	30	7.5	4.5	0	6.5	6.5	0.499995	0	0	0	6	10.5	12	0	9	2.5	2.5	6.50001	0	9	3.5	7.5	1.5	0	5	8	7	30	0	0	14	0	10	0	18	0	18	6	16	0
	2.25	6	4.5	2.5	0	6.5	0	0	13	23	9.5	9	0	18	0	7	0	4.5	0	6	8	8.5	0	4	3	5	6.5	7	5	0	3.5	9	0	0	18	1	28	23	0	12	10	10	5	12	6	30	0	17	0
	2.75	6.5	8.5	0	0	12.5	2.5	2.5	7	24	8.5	16	0	15.5	0	12	0	4.5	0	6	12	11	0	0.499995	0	5	12	7	6	3.5	7	6.5	1.5	6	2	11	30	21	0	17	18	18	0	10	15	29	0	26	5
	3.25	13	4.5	0	0	17	0.499995	6	19	24.5	12	11	0	12	6	8.5	12.5	4	3	5	14	16.5	0	10	4.5	4	8.00001	5.5	13.5	1.5	4.5	11	17.5	17	23	0	30	28	0	30	23	19	29	26	16	29	7	15	13
	3.75	18.5	6	0	0	19.5	0	5	10	27.5	9.5	11	0	22.5	4.5	8.00001	17.5	3	3	5.5	16	8.5	12	15.5	11.5	12.5	11	3	11.5	7.5	9	6	13	14	30	6	30	11	15	21	14	12	30	28	27	25	2	9	5
	4.25	15	4.5	2.5	0	23.5	3	2.5	11	27.5	13	5.5	0	13	3	9.50001	16	5.5	4.5	10.5	21.5	15	13	6	10.5	9	14.5	14.5	14.5	11.5	11.5	8.5	15	22	30	23	30	16	7	22	30	18	3	30	16	30	10	12	17
	4.75	22	5	4	0	29.5	4.5	3	10	27.5	8.5	13	0	22	0.499995	0	14	0	6.5	1.99999	19	27.5	12.5	10.5	11	8.5	24	13.5	17.5	6.50001	14.5	9.50001	17	24	30	23	30	27	30	7	30	30	0	13	29	30	30	17	21
	5.25	25.5	6.5	5.5	0	27	5.49999	6	19	26.5	10.5	9.5	0	17.5	9.5	2.5	23.5	0	11.5	10.5	29	17	6.5	13.5	11.5	3.99999	22	26.5	17.5	5.5	11.5	6	17	30	22	20	30	15	28	20	15	28	21	26	6	30	16	28	30
	5.75	12.5	0	8.00001	4.5	18.5	0	5.5	20.5	28.5	11.5	4	0	18	10	6.5	29	4	15.5	12.5	28.5	14.5	8.5	9	27.5	18.5	27	8	19	0.499995	5	4	15	30	29	11	30	14	30	24	30	23	22	30	30	30	27	30	30
	6.25	23	0	13	7	17.5	7	3	8	28	12	2.5	0	18.5	6	4	25	2.5	10	8	25.5	18.5	8.5	20.5	30	24	28.5	13	19.5	18	18	13.5	13	30	30	29	30	26	30	26	30	21	30	30	30	30	13	20	26
	6.75	16	4	22.5	11.5	18.5	0	1.00001	10.5	29	3.5	10.5	0	25	5.5	5.5	30	5.5	9	7.5	29	23.5	2.5	18	28	15	28.5	19	21	16.5	20.5	8	21	30	30	30	30	22	19	29	30	19	30	30	30	30	18	30	30
	7.25	13.5	1.5	23.5	15	19	3	3.5	10.5	28	15.5	9	1.99999	25.5	6	5	25.5	13.5	19	9.99999	27.5	27.5	5.5	24	28.5	15	26	12.5	30	18	26	8.00001	19	26	30	30	30	20	29	26	30	26	30	28	30	25	0	19	30
	7.75	9.50001	0	12	8.5	20.5	15	14.5	13	28	17	0	4	28.5	2.5	15	30	10.5	16	6.5	27.5	27	6.5	29	28.5	29.5	30	16	27.5	28	26.5	13.5	16.5	14	13	30	30	28	30	13	30	25	30	23	30	15	0	29	29
	8.25	6.50001	0	19.5	15	24	11.5	16	18.5	23.5	14	9	11.5	25	13	11	17.5	6.5	15	19	30	27	0	14	20.5	29	26	14	25.5	26.5	20	11	28	0	28	30	30	8	30	30	30	11	8	17	24	14	11	30	15
	8.75	15	0	15	12.5	25	10.5	8.5	15.5	28	15	10	15	23.5	2.5	14	17.5	8.5	14.5	13	20	16	0	12.5	22	29	21.5	4	18.5	20.5	25.5	11	28	10	30	29	30	11	30	14	25	24	5	19	30	26	22	23	6
	9.25	9.5	5	8.5	3.5	17	8.5	18	2.5	30	7	2.5	9	27	1.99999	22.5	3	3	9.5	7	9	17.5	3	15.5	23.5	4.5	8	7.5	19.5	19.5	12	4.5	13.5	9	29	3	30	29	25	0	30	30	8	0	26	22	6	26	3
	9.75	10	15	14.5	3	19.5	5.5	8	14	25	21	3	4	20	3	5.49999	4.5	4.5	12.5	3	8.5	14	0	8.5	0.499995	4.5	13	3	5.5	17.5	15	15	11.5	11	5	23	29	24	18	9	16	14	22	10	12	19	7	22	16
	10.25	9.5	10	0	3	12.5	3.5	7	8.00001	25	16.5	0	9	20	0	8.5	0	2.5	13.5	14.5	7.5	2.5	3.5	12.5	15	4.5	13.5	9.5	7	12	12	3	10	0	30	0	29	5	0	8	22	15	19	0	0	30	0	8	11
	10.75	11.5	0	8.5	0	19.5	0	7.5	4	18.5	8.00001	1.00001	5.5	21.5	0	0	0	2.5	4.5	9.5	0	15.5	0	9	4.5	0	5.5	1.99999	0.499995	0	5.5	0	2.5	0	18	0	4	6	0	0	0	0	0	0	13	6	0	0	0
	11.25	0	0	6	0	10	3	3	0.499995	24	3.5	1.99999	3	13	6	0	0	3.5	0	0	0	3.99999	0	1.5	0	0	0	3.5	0	0	4	4.5	3	6	1	7	17	0	0	0	0	0	0	0	0	0	0	0	12
	11.75	2.5	0	0	0	6.5	0	0	4	16	5	6	0	4.5	9	0	8.5	1.99999	5	6	0	1.5	0	7	0	0	0	0	0	0	0	0	0	0	5	0	0	1	0	0	6	0	0	0	0	16	0	3	0
	12.25	1.99999	2.5	0	0	7	0	0	0	11	0.499995	7.5	4	0	1.99999	0	0	3.5	2.5	4	0	17	7	4	0	0	3.50001	0	5	1.00001	8.5	0	0	21	30	7	8	25	11	3	21	0	16	2	2	20	14	3	0
	12.75	6.5	14	0	6.5	27.5	4	1.5	2.5	24	14.5	16.5	19	6.5	10.5	8.49999	3.5	9.5	7.5	22	4	18.5	22.5	5.5	0	0	24.5	8.5	22.5	16.5	9.50001	0	12	30	29	30	10	19	0	3	30	13	30	30	20	30	20	5	9
	13.25	21	22	3.50001	0	27	10	9.99999	6.5	24.5	17	4	16	15	15	20.5	22.5	20.5	22.5	17	9.5	28	14	25.5	0	5	23.5	26	30	26.5	19.5	4	30	30	30	10	30	14	13	17	19	22	30	21	18	30	21	14	21
	13.75	28	23	25	7.5	28.5	21.5	20.5	22.5	29	11.5	7.5	26	24	24.5	23	25	25	25.5	24.5	19.5	28.5	10	21.5	12	14.5	29.5	30	23	25	30	16.5	26.5	30	30	30	30	30	30	28	30	27	30	30	30	30	25	30	29
	14.25	29	15	15	18	30	17.5	20	22.5	29	20	13	14	26	23.5	21	18	27	28.5	29	20	26.5	7	24	24	18	29.5	30	27.5	28.5	26.5	22	30	24	5	16	6	2	5	5	12	8	2	16	16	30	26	13	16
	14.75	21	25	30	0	22.5	24.5	23.5	22.5	27	17.5	9	19	20	24.5	24.5	26	25	25.5	18.5	21	28	15	8.00001	21	25.5	30	30	30	21	30	10.5	25	30	29	29	25	14	14	26	15	11	30	30	30	30	20	30	15
	15.25	27	15.5	27	6	28	20.5	28	18	30	23.5	28	19.5	22.5	22	24	18	26.5	29	13.5	30	30	16.5	21.5	30	30	29.5	30	24	22	28	12.5	30	30	30	29	30	30	30	21	30	30	30	30	26	30	30	25	25
	15.75	25.5	12	30	14.5	23.5	21	24	25	21	25.5	24.5	18.5	23.5	30	22	27.5	26	29	28.5	18.5	30	7	30	30	16	30	25	27	26	26	25	25.5	8	30	20	10	30	30	21	30	30	16	30	25	17	30	27	30
	16.25	23.5	24	21	20	30	22.5	25	24	30	22	19	19.5	25.5	20.5	30	27	27	27	30	19	30	14.5	17.5	28	30	30	30	23.5	24	30	7.5	30	30	30	29	30	25	30	29	30	23	4	30	30	14	13	25	30
	16.75	25.5	23	29.5	22.5	30	25	27.5	21	30	22	18	19	27	20	26	16.5	25.5	27.5	21.5	20	25.5	19	26.5	30	23.5	29.5	30	21.5	29.5	25.5	21.5	30	30	29	23	30	28	30	26	29	30	29	30	21	18	26	21	30
	17.25	21.5	24.5	26.5	26	30	19	23	25.5	30	27	18.5	23	18.5	25.5	29.5	28.5	26	28.5	30	28	28	20.5	30	26.5	13.5	29.5	30	26	16.5	25	19.5	30	5	9	10	19	0	27	22	30	13	5	1	8	28	0	19	2
	17.75	28.5	24	29.5	17	30	25	17.5	25	27.5	21.5	21.5	25.5	23.5	22.5	17.5	29.5	27.5	30	25.5	29.5	28	26.5	28.5	24.5	24	30	30	29.5	26.5	28.5	21	28	30	30	26	23	18	12	15	12	11	0	9	25	30	1	28	22
	18.25	30	22	30	18.5	29.5	28	25	24	22	30	24.5	25.5	25	26	30	26	28.5	30	30	28	29	19.5	11	27	29	29	27.5	28.5	15.5	30	30	30	30	30	0	28	30	24	29	0	30	20	30	9	27	28	23	30
	18.75	23.5	25.5	30	24.5	30	28	30	30	30	27.5	23.5	27.5	26.5	30	24	9.99999	24	30	23	29	27	22	25	30	21	27.5	30	26	30	26.5	20	30	29	12	12	30	30	24	0	27	16	30	21	30	22	6	18	30
	19.25	25.5	26	22	23	22.5	30	30	20.5	30	30	24.5	25	25.5	28	27	3.5	30	29.5	28.5	30	30	25	30	28	25	27	29	30	22	30	29	30	10	30	30	8	30	30	17	22	30	30	23	30	14	10	30	30
	19.75	30	15.5	30	30	27	30	30	27.5	28.5	29.5	30	29.5	20.5	26	29	26	30	30	30	21.5	30	23.5	30	30	30	30	30	28.5	26.5	27.5	29.5	28.5	28	30	30	24	30	30	18	30	14	30	17	30	30	25	13	30
	20.25	29.5	17	26.5	18	25	30	30	25.5	21.5	29.5	30	24.5	25.5	30	27	22.5	30	30	29.5	25	30	17.5	30	26.5	22.5	27	30	25	16.5	30	27	24.5	30	30	20	8	30	30	28	30	20	30	23	30	29	30	17	30
	20.75	28.5	22.5	27	20	29.5	30	30	26.5	24	30	30	30	26	26	20.5	29.5	30	24.5	27	23.5	27.5	16.5	30	30	22	30	30	30	27.5	30	30	23.5	17	30	6	23	22	30	26	30	10	30	21	30	30	7	24	30
	21.25	28.5	20.5	18.5	10.5	27.5	24.5	20.5	24	29	24.5	30	28.5	26.5	23.5	28.5	30	29.5	30	26.5	28	30	28	29.5	30	30	30	30	26	29.5	20.5	30	21	16	10	30	26	14	30	19	30	3	30	14	27	29	12	11	30
	21.75	30	29	30	15	30	28	30	30	30	29.5	30	29	14	26	30	26	29.5	30	30	30	30	30	30	21	11.5	30	30	20	30	27.5	26.5	23.5	9	22	30	19	30	30	13	20	30	30	22	0	19	30	28	19
	22.25	24	27.5	27	20.5	21	28	25	20	30	14.5	27.5	22.5	30	30	24	27.5	30	30	23	30	28.5	16.5	30	25.5	14	26.5	24	26	30	28.5	30	22	5	30	23	11	30	30	27	6	20	20	30	0	25	21	27	7
	22.75	30	18	16.5	5	23.5	30	9.5	15.5	13.5	25.5	22	14.5	16	24	19.5	8.5	30	23.5	13.5	21	17	17.5	30	7	10.5	19	19.5	8.5	22.5	23	16.5	21	0	5	0	10	8	25	0	2	27	0	10	0	28	0	0	9
	23.25	25.5	9.5	7.5	0	19.5	20.5	16.5	6	19	8	17.5	0	13	15.5	21	11	20.5	21	0	18.5	17.5	4.5	16.5	2.5	0	12.5	9	10	17.5	19.5	17.5	13	0	6	0	8	0	0	0	0	0	0	0	0	5	0	5	0
	23.75	20.5	8	1.99999	1.99999	18	12.5	7.5	11.5	25	23	8.00001	5	4.5	13	16	9	9.50001	16.5	3	18.5	10	2.5	23.5	3	2.5	15	13	9	9	9.50001	5	12.5	0	16	0	11	11	0	0	0	5	0	0	7	11	0	7	0
	24.25	0	0	0	17	7	0	5	0	3	0	0	0	11	0	0	0	0	7	18	8	0	0	0	0	14	0	5	0	0	3	0
	24.75	0	13	7	18	28	0	8	0	21	0	0	0	5	0	12	12	0	9	14	7	11	7	0	0	9	0	6	0	0	8	15
	25.25	8	0	11	15	17	0	10	2	11	0	13	0	11	5	14	0	17	3	20	19	0	14	8	28	9	0	18	5	2	0	1
	25.75	7	12	7	30	26	0	11	7	19	15	14	16	27	7	13	0	15	11	20	12	3	16	0	13	18	15	14	11	7	0	2
	26.25	23	9	16	30	12	8	30	21	3	21	8	14	25	7	13	14	0	15	27	30	20	25	9	0	15	21	30	10	15	18	21
	26.75	18	30	10	30	30	2	27	29	17	25	26	18	27	0	14	13	19	15	12	23	9	23	8	14	20	9	22	11	8	18	18
	27.25	22	25	18	30	14	10	14	5	30	25	20	11	29	19	27	21	28	17	14	18	30	28	7	1	21	14	26	23	17	15	19
	27.75	12	12	28	30	27	12	19	19	30	30	19	24	30	24	29	11	30	23	21	30	14	29	15	6	27	14	30	26	17	18	6
	28.25	23	24	20	22	30	25	18	21	26	30	24	30	30	18	28	12	30	30	26	30	10	17	28	6	15	30	30	29	23	11	29
	28.75	29	12	30	30	24	30	28	28	28	6	30	30	30	27	30	12	29	14	29	19	22	29	18	30	17	26	30	26	20	26	25
	29.25	30	27	30	30	20	30	30	30	29	22	30	30	30	28	28	21	29	24	30	30	23	30	29	26	30	28	30	19	16	29	15
	29.75	29	26	30	30	28	30	30	25	22	30	30	30	30	27	30	30	26	20	30	28	30	30	30	30	19	29	30	20	27	21	29
	30.25	30	27	30	30	19	30	24	30	30	30	26	30	30	30	30	30	30	20	30	30	30	24	30	28	30	28	30	24	26	14	23
	30.75	30	30	23	30	25	30	30	30	30	30	27	30	30	25	30	26	30	30	30	30	30	30	30	29	30	20	30	27	15	30	27
	31.25	26	12	28	30	16	4	29	30	30	30	29	30	30	30	30	5	30	30	25	30	30	29	30	26	30	27	29	23	30	25	30
	31.75	27	30	30	30	26	30	27	30	27	28	30	30	30	26	13	20	30	30	22	30	30	25	30	9	30	27	30	26	25	29	25
	32.25	19	28	10	30	30	30	24	30	29	29	30	30	30	23	24	28	30	14	3	17	11	30	7	29	30	19	30	25	17	27	27
	32.75	0	20	6	29	24	30	14	30	29	8	20	30	21	23	24	29	30	12	30	30	22	22	18	12	30	28	30	26	16	21	23
	33.25	18	30	19	30	17	30	0	30	24	17	9	30	30	30	15	30	22	2	17	30	10	29	0	19	26	16	30	22	8	8	29
	33.75	6	15	29	30	7	30	6	29	5	20	0	30	28	21	15	25	8	16	15	20	20	26	15	18	21	18	30	20	24	0	15
	34.25	9	10	1	28	9	11	5	25	20	17	6	20	23	27	18	29	0	7	10	11	13	5	0	5	11	11	30	8	0	0	0
	34.75	5	12	8	23	0	0	0	4	10	0	0	0	6	0	21	6	0	0	13	15	7	17	0	8	13	3	8	5	0	5	5
	35.25	0	0	6	10	10	0	0	0	0	0	0	0	13	0	1	0	0	15	0	17	9	14	0	0	2	7	0	7	0	6	8
	35.75	0	0	0	0	8	0	0	0	0	5	0	0	12	7	13	0	0	3	1	7	14	6	0	0	0	0	0	0	0	12	0
	36.25	21	22	15	20	30	8	24	4	0	30	30	18	23	15	29	15	30	20	30	30	28	29	12	23	22	11	20	0	8	30	0
	36.75	30	30	30	27	17	30	30	30	14	30	30	15	30	23	30	30	18	30	30	30	27	30	25	30	30	16	13	0	18	30	0
	37.25	30	30	29	16	30	30	23	25	30	30	30	20	30	29	30	30	30	30	30	30	29	30	30	30	30	30	29	8	18	29	18
	37.75	30	30	20	30	25	24	30	30	26	30	30	16	30	17	30	30	26	30	30	30	29	30	30	29	29	27	30	9	27	30	24
	38.25	22	29	29	30	30	14	29	25	30	30	30	30	30	13	8	30	30	30	30	30	30	30	30	29	30	26	30	19	30	30	14
	38.75	30	30	23	17	20	14	30	30	30	30	30	28	30	23	29	30	30	30	30	30	30	30	30	29	30	30	29	27	24	27	14
	39.25	30	22	30	30	27	29	29	29	22	19	30	30	30	27	30	30	30	20	30	30	30	30	30	30	30	29	26	30	22	30	26
	39.75	30	8	20	17	29	12	22	29	15	29	30	30	30	29	12	30	30	30	30	30	22	30	30	22	17	26	30	30	15	30	25
	40.25	30	30	30	30	24	30	26	11	26	28	19	30	30	20	27	24	30	30	30	30	12	30	30	30	23	22	30	30	8	27	14
	40.75	30	30	30	21	26	30	24	20	30	17	30	21	30	25	30	30	30	30	30	30	23	30	30	30	28	21	30	23	22	30	19
	41.25	30	30	30	30	22	30	25	30	30	30	25	25	30	25	30	28	30	30	30	30	30	30	30	30	19	30	30	30	17	30	16
	41.75	30	25	30	30	19	30	30	9	18	21	30	30	30	29	15	23	21	13	30	30	30	28	30	30	24	27	30	30	20	23	25
	42.25	30	30	30	20	22	20	26	18	30	30	25	28	30	30	30	30	30	9	30	30	30	28	30	23	23	30	30	25	25	30	26
	42.75	24	30	22	27	30	0	29	30	30	23	29	20	30	15	22	20	24	30	30	30	30	30	30	20	15	28	30	26	7	30	26
	43.25	30	30	11	16	26	8	24	30	30	30	20	30	30	29	10	30	26	27	30	30	30	30	30	30	16	25	29	29	23	30	27
	43.75	30	13	30	22	25	30	30	30	30	29	30	29	30	18	23	23	21	2	21	30	18	30	30	30	30	21	30	30	20	30	17
	44.25	30	26	26	23	24	30	25	30	23	30	15	30	30	21	30	30	27	30	23	30	13	28	30	30	26	29	30	24	10	25	24
	44.75	30	30	15	23	20	30	24	30	30	29	30	30	30	30	30	16	30	18	30	30	30	30	29	30	30	30	30	26	28	17	19
	45.25	19	30	28	16	30	30	17	30	19	10	27	30	28	30	21	17	23	30	21	18	28	30	7	30	26	29	30	22	6	30	23
	45.75	0	30	16	10	28	30	28	30	16	30	0	30	30	28	14	30	17	30	27	30	15	28	30	30	24	13	30	24	30	30	3
	46.25	25	29	14	6	24	11	19	30	30	14	0	30	12	4	0	30	13	12	23	30	27	21	30	18	30	18	13	30	30	30	30
	46.75	0	0	12	13	8	0	20	24	29	0	24	13	3	2	18	30	11	0	17	19	12	30	30	0	30	20	0	21	18	30	21
	47.25	0	0	5	20	0	0	13	0	15	0	11	7	17	8	30	17	2	1	28	1	6	14	10	0	29	9	3	12	0	8	8
	47.75	5	9	3	14	5	0	0	0	8	0	0	1	8	6	8	0	0	7	8	20	0	5	0	0	12	0	3	3	0	0	11
	k: Day sleep								l: Night sleep
	Normal food			1% H2O2					Normal food			1% H2O2
	w1118	Upd3-/-	Upd23-/-	w1118	Upd3-/-	Upd23-/-			w1118	Upd3-/-	Upd23-/-	w1118	Upd3-/-	Upd23-/-
	297	368	305	371	280	470			585.5	523	540	566	586	414
	446	490	419	404	194	547			466	633	675	573	500	587
	318	497	588	397	442	315			504.5	648	683	528	569	422
	343	353	355	612	434	236			325.5	595	675	508	608	660
	321	415	182	454	391	117			618	555	595	543	347	405
	342	301	433	372	65	316			530.5	608	610	470	381	607
	419	422	509	389	324	422			505	486	399	577	420	610
	360	379	616	455	177	580			477	628	670	554	484	632
	292	603	588	473	522	544			616.5	613	697	561	640	545
	356	505	482	418	534	172			525	678	561	550	685	542
	370	587	537	391	462	339			485.5	651	669	555	543	404
	489	518	379	463	512	209			485	629	691	571	552	476
	175	549	568	568	429	285			485.5	583	690	633	485	400
	400	410	367	404	370	307			539	579	596	497	568	487
	306	630	420	472	413	441			543.5	687	640	537	686	645
	345	352	491	374	388	563			472	510	643	603	439	465
	247	430	607	433	414	373			591.5	516	636	559	556	656
	398	598	490	367	183	427			609	708	681	520	177	455
	501	304	426	457	266	485			528.5	529	576	649	348
	276	313	260	521	238				522.5	634	673	659	429
	461	386	628	398	258				625.5	471	696	560	211
	322	439	475	505	86				403	546	704	662	404
	302	543	522	312	518				558.5	604	636	623	650
	423	571		337	474				487	693		583	634
	320	278		467	277				418.5	644		604	317
	240	600		390	510				623	656		547	633
	259	442		548	419				602	668		585	562
	419	324		393	255				557.5	520		508	437
	297	528		313	387				540	684		426	591
	284	446		344	370				590	684		637	688
	195	458		392	454				451.5	534		431	547
	237	690			557				577	677			653
	94								472
	480								562
	150								440
	227								457
	284								501
	280								515
	146								393
	126								485
	496								423
	140								472
	222								470
	289								444
	202								576
	295								395
	199								444
	412								474
	391								505
	140								410
	294								601
	311								580
	262								494
	363								675
	291								525
	350								551
	208								502
	337								450
	181								401
	360								284
									310
									499
									375
	m: Sleep pattern
	Bin (hours)	EEC>																						EEC>upd3 OE
	0.25	0	0	0	0	0	0	0	5.00001	0	0	0	0	0	0	0	0	0	0	0	27	0	0	18	22	23	11	13	11	0	18	0	5.00001	0.99999	0	28	27	0	16	6	0	0	0	8.00001	14	0	0	6	15
	0.75	0	2.00001	0	0	0	0	0	0	0	0	0	2.00001	0	11	0	0	0	0	0	11	0	0	23	30	25	21	20	26	0	6	0	0.99999	5.00001	12	25	23	0	23	8.00001	6.99999	14	0	19	21	0	0	20	30
	1.25	8.00001	3.99999	0	0	0	0	0	8.00001	0	13	0	3	0	0	0	0	0	0	6	3	0	0	20	19	23	26	27	16	0	23	0	9.99999	16	12	29	18	16	22	0	13	11	0	17	14	0	0	13	8.00001
	1.75	12	9.99999	0	0	0	0	0	0	0	20	0	0	0	0	0	0	0	0	0	29	0	8.00001	19	24	16	0	21	29	0	25	0	0	15	3	23	24	19	12	14	9	20	16	5.00001	22	0	5.00001	8.00001	11
	2.25	8.00001	0	0	0	0	5.00001	0	3.99999	0	27	0	0	0	6	0	0	0	0	0	25	0	0	26	23	30	21	27	12	8.00001	27	0	0	5.00001	11	23	26	24	23	8.00001	11	0	19	11	15	0	0	18	12
	2.75	0	22	0	0	0	6.99999	0	5.00001	3.99999	28	5.00001	9.99999	0	19	0	0	0	0.99999	0	28	0	8.00001	27	20	23	22	9	21	13	30	15	0	17	6.99999	29	24	25	19	0	19	13	9.99999	16	16	0	0	18	21
	3.25	0	29	0	5.00001	0	5.00001	0	0	3.99999	27	8.00001	0	0	5.00001	5.00001	0	0	3.99999	13	28	5.00001	5.00001	24	23	18	20	23	30	2.00001	19	6.99999	0	18	8.00001	24	24	22	25	0	18	6	11	30	26	0	0	9.99999	24
	3.75	9.99999	29	0	11	0	12	15	9	9.99999	29	0.99999	0	0	0.99999	0	0	8.00001	13	27	28	9.99999	6	9.99999	13	20	24	26	12	14	30	27	0	2.00001	14	22	28	26	21	11	22	11	19	29	18	0	0	0	22
	4.25	6.99999	27	0	9.99999	0	5.00001	12	9.99999	12	30	20	5.00001	8.00001	13	0	0	0	27	26	23	16	16	30	24	21	25	24	30	12	24	30	0	16	19	29	28	29	22	13	23	14	25	30	24	8.00001	6	12	20
	4.75	13	27	5.00001	25	0	13	0	5.00001	6	30	21	8.00001	0.99999	20	6	0	0	22	30	29	15	30	24	20	30	6	12	30	27	9.99999	26	0	3.99999	22	30	18	30	25	24	26	16	26	30	28	6.99999	0	12	28
	5.25	17	22	0.99999	30	5.00001	30	9.99999	13	30	30	21	25	30	30	0	0	9.99999	28	30	28	21	30	30	30	25	26	24	30	24	21	30	15	13	30	28	22	29	26	30	25	19	19	30	26	30	6	20	16
	5.75	27	24	21	30	6	29	30	30	27	26	23	24	25	30	0	0	18	25	30	27	19	30	24	9	24	30	26	30	22	28	30	6	15	25	29	26	30	13	28	25	23	29	30	27	25	15	12	0.99999
	6.25	28	21	27	30	0	29	30	29	30	30	30	30	30	30	12	5.00001	9.99999	25	30	26	15	30	30	30	30	20	30	25	30	26	30	0	20	30	30	28	29	24	30	30	9	26	30	30	30	20	11	17
	6.75	30	25	28	28	6	30	29	30	30	30	22	30	30	30	9	5.00001	18	30	30	30	29	16	30	26	29	30	30	24	30	23	30	11	13	30	30	27	30	28	30	26	15	26	30	24	30	25	18	29
	7.25	29	26	29	30	24	29	29	30	30	30	28	30	30	30	23	0	24	30	30	26	29	27	21	30	29	22	29	30	30	30	30	0	17	25	30	30	30	26	30	30	15	30	30	30	21	24	14	30
	7.75	30	25	29	30	29	30	30	30	30	30	21	30	30	30	11	0	19	29	30	28	29	30	22	29	30	30	28	30	23	28	30	0	20	30	30	25	30	27	30	30	12	27	30	30	30	30	30	30
	8.25	27	21	24	24	30	29	25	30	30	30	30	30	30	29	17	0	19	30	30	19	29	28	29	27	28	30	30	30	23	30	30	0	22	25	30	30	30	27	30	30	13	30	30	30	30	26	25	30
	8.75	22	22	30	29	29	30	30	30	30	29	30	29	30	28	0	3	22	30	29	27	30	14	22	21	27	24	30	30	30	30	28	6	0.99999	30	30	29	30	30	30	25	13	30	30	26	30	30	30	30
	9.25	30	9.99999	24	11	29	29	22	18	27	30	25	30	30	27	6	9	0.99999	26	25	27	22	0	30	30	30	30	30	30	27	24	30	0	30	17	28	30	30	27	28	30	23	30	30	30	30	30	25	30
	9.75	22	0.99999	15	29	26	28	30	16	25	30	18	25	11	6.99999	0	5.00001	0	20	6	22	28	0	30	30	30	26	30	30	6.99999	30	25	0	30	27	29	30	30	30	30	26	20	30	30	30	22	24	28	30
	10.25	13	5.00001	0	2.00001	20	14	18	11	19	14	20	21	9	17	5.00001	0	0	5.00001	0	17	0	0	30	30	28	30	30	30	14	30	30	0	21	30	30	28	30	27	30	30	5.00001	30	29	30	30	28	27	29
	10.75	0	0	0	0	0	15	5.00001	8.00001	0	0	11	0	0	5.00001	5.00001	3.99999	0	0	0	14	6.99999	5.00001	30	30	25	20	28	24	15	28	30	0	20	24	30	22	30	27	24	27	25	24	30	25	30	25	27	29
	11.25	0.99999	0	0	0	0	0	0	11	0	0	0	0	0	0	0	6	5.00001	0	0	6.99999	6	0	21	24	23	23	30	19	22	30	30	3	12	28	30	30	30	25	28	12	17	26	30	25	26	27	28	29
	11.75	11	0	0	0	0	0	0	6.99999	0	0	0	0	0	0	0	5.00001	5.00001	0	0	0	0	5.00001	24	22	3	9	13	12	0	0.99999	2.00001	2.00001	15	0	6	15	0	11	0	0	0	19	29	5.00001	0	0	2.00001	2.00001
	12.25	11	0	6	8.00001	6.99999	6	0	12	6	0	0	0	5.00001	9.99999	16	6	15	20	9	17	19	0	12	26	22	26	19	21	0	0	0	0	25	0	22	25	0	12	0	0	0	20	20	17	0	9.99999	0	0
	12.75	3.99999	22	17	30	28	30	25	8.00001	30	9	9.99999	0	30	30	25	13	30	24	6.99999	27	29	6.99999	30	30	22	6	25	22	9	15	6	0	0	19	15	20	0	0	16	6	6.99999	26	26	9	14	13	6.99999	18
	13.25	23	30	9.99999	21	25	29	30	9	30	6.99999	17	14	30	30	30	19	30	30	19	26	26	30	13	21	16	11	25	30	19	16	6	0	6	29	28	30	0	15	26	11	23	30	30	24	24	19	22	28
	13.75	16	30	24	19	29	30	30	30	30	0	18	26	30	30	30	9.99999	30	30	30	30	27	30	17	30	30	28	22	25	30	30	30	9	12	13	28	30	11	30	27	0	30	25	29	25	22	24	28	29
	14.25	17	30	26	28	26	30	30	22	30	11	23	28	30	30	30	24	30	30	27	30	27	30	26	30	21	25	24	30	30	30	30	29	19	30	30	28	30	26	30	18	30	30	30	30	30	6.99999	14	30
	14.75	25	30	19	30	29	30	24	30	30	16	17	24	30	21	30	25	24	26	30	30	26	30	30	22	30	30	30	25	30	30	30	30	30	26	30	30	30	30	20	25	30	30	30	28	29	27	30	30
	15.25	30	27	25	25	29	27	29	24	30	19	29	30	30	30	30	24	26	28	30	30	26	30	25	30	27	16	30	30	30	30	18	27	22	27	23	30	30	29	30	24	28	30	30	30	26	30	30	30
	15.75	22	29	26	30	30	30	22	25	26	18	24	26	30	29	30	28	30	30	29	30	30	30	30	26	24	22	17	29	19	9.99999	24	30	30	28	30	30	30	28	30	30	30	30	30	28	29	23	28	27
	16.25	30	29	23	28	21	25	29	30	30	23	6	30	30	30	30	29	30	29	30	27	30	30	30	25	27	22	30	30	23	20	30	9	30	24	30	30	30	30	23	24	29	17	30	30	25	0	30	28
	16.75	30	28	19	30	14	23	30	15	30	24	23	30	30	30	30	17	30	30	30	18	24	30	25	23	30	12	21	29	30	26	18	26	30	30	30	30	23	25	30	30	30	27	30	30	30	0	30	30
	17.25	21	30	26	25	13	30	30	25	22	21	25	25	30	30	30	15	30	25	30	27	29	30	30	30	30	20	21	30	23	6	30	29	21	30	30	24	30	30	23	30	30	27	30	30	30	12	23	30
	17.75	29	27	25	30	27	30	30	30	30	9	30	28	30	30	28	30	30	30	30	30	11	17	30	30	30	30	28	30	17	17	30	30	30	24	30	30	29	22	30	19	30	26	30	30	30	30	30	30
	18.25	26	29	27	30	28	30	30	9.99999	29	15	30	28	30	20	30	28	30	19	27	30	14	30	25	30	30	30	24	30	6.99999	16	18	29	30	30	30	30	30	26	30	29	30	30	30	30	11	25	30	26
	18.75	30	23	26	30	30	30	17	30	30	30	28	30	30	21	27	29	30	29	30	30	22	20	30	24	30	30	30	30	20	0	30	27	23	30	30	30	30	30	30	30	28	25	30	30	15	23	26	30
	19.25	30	29	26	29	17	30	30	30	30	24	22	29	30	30	30	30	30	29	30	30	30	30	25	28	26	22	28	30	30	20	30	16	30	30	30	30	30	27	30	30	30	28	30	30	20	30	30	30
	19.75	25	30	26	30	21	30	30	30	25	30	30	25	30	30	30	21	30	30	30	30	30	30	30	18	26	29	27	28	30	28	30	30	29	30	30	30	30	30	30	30	30	30	30	24	29	30	30	30
	20.25	30	26	26	19	27	30	30	30	30	30	30	30	30	21	30	30	30	28	30	25	28	30	30	30	30	30	30	30	30	20	30	30	30	30	30	30	30	30	30	30	28	22	30	30	30	30	30	30
	20.75	21	28	30	30	26	24	30	30	30	30	24	25	30	29	30	23	29	28	28	29	24	26	30	17	30	22	24	30	30	22	30	26	23	30	28	30	30	30	20	30	30	15	26	29	30	30	24	30
	21.25	23	24	30	26	26	30	23	24	5.00001	30	30	24	30	30	30	28	27	28	30	30	30	30	30	27	30	30	11	21	30	20	30	30	30	30	30	30	30	30	30	28	28	15	28	30	19	23	30	29
	21.75	26	24	25	30	25	6.99999	30	30	25	22	24	22	30	30	28	22	29	28	20	30	25	30	30	30	30	30	15	30	26	28	30	30	30	30	29	29	30	30	30	22	25	30	30	30	30	18	23	30
	22.25	29	14	30	30	24	26	30	21	30	30	24	24	30	12	30	30	28	19	9	30	30	28	28	30	23	30	30	30	12	29	30	9	30	30	30	30	30	30	25	30	29	25	30	13	30	30	30	25
	22.75	26	30	27	30	23	30	26	30	17	20	26	30	24	0.99999	28	30	24	30	30	26	22	30	23	25	28	15	24	20	13	19	22	28	30	3	30	30	29	22	30	25	30	30	29	18	26	27	25	22
	23.25	14	6	17	6	19	21	22	19	17	6.99999	15	15	30	15	23	15	30	16	16	30	30	9.99999	30	30	30	14	29	30	6	22	30	25	23	30	30	30	26	17	28	30	30	21	30	25	14	20	29	30
	23.75	5.00001	0	0	0	0	0	28	0	6.99999	0	0	0	11	0	23	12	24	0	0	0.99999	9.99999	25	6	23	17	14	15	22	9	20	6.99999	15	15	19	29	17	14	19	21	16	22	18	8.00001	22	12	6	6.99999	16
	24.25	24	16	15	28	9	9	15	24	11	13	23	9.99999	20	16	24	22	25	9	16	23	17	19	13	23	8.00001	0	19	9.99999	5.00001	6	0	24	0	0	9.99999	6	6	18	20	11	22	6	18	5.00001	3	0	0	0
	24.75	11	14	0	29	5.00001	12	5.00001	6	0	21	3	0	0	0	16	6	15	0	5.00001	8.00001	0	0	23	9	8.00001	2.00001	20	16	23	12	0	9	0	0	9	13	9.99999	28	6	11	9.99999	6.99999	24	22	0.99999	6	15	9
	25.25	8.00001	19	5.00001	26	5.00001	9	0	0.99999	12	23	0	0	0	11	3.99999	0	16	0	0	5.00001	0	0	19	20	26	8.00001	9.99999	27	2.00001	18	5.00001	12	3	6.99999	20	14	15	29	16	14	28	8.00001	30	23	3.99999	9	22	30
	25.75	18	19	0	25	0	5.00001	0	14	0	16	0	0	0	0	17	0	28	0	5.00001	0	5.00001	5.00001	27	28	23	11	23	28	23	11	0	18	13	15	30	22	6	22	15	22	0.99999	9.99999	17	20	12	2.00001	22	21
	26.25	23	25	0	16	0	0	0	16	20	21	0	0	0	0	17	6	11	0	6	0	12	5.00001	26	29	21	0	27	30	15	13	6.99999	15	5.00001	5.00001	16	16	15	21	16	16	6.99999	9.99999	14	16	8.00001	3.99999	15	30
	26.75	20	30	0	15	6	0	0	24	22	9.99999	0	0	0	8.00001	22	0	0	0	12	5.00001	12	5.00001	9.99999	29	25	9.99999	28	30	27	28	9	9.99999	9.99999	6.99999	20	22	0	11	8.00001	11	2.00001	5.00001	27	8.00001	9.99999	6	23	15
	27.25	20	25	0	21	13	0	6.99999	16	29	28	0	0	6	15	22	0	6.99999	5.00001	30	6.99999	21	6	3	30	12	0	27	3.99999	13	11	13	5.00001	6.99999	0	25	6.99999	9	25	13	20	6.99999	9	17	23	0	0	26	28
	27.75	28	26	0	11	2.00001	0	6	24	24	21	0	0	9.99999	6	25	11	11	0	30	17	8.00001	15	30	18	18	22	19	25	25	6	17	6	6	0	21	6	22	26	16	19	13	25	16	19	5.00001	0	18	30
	28.25	23	27	0	30	0	0	5.00001	29	25	23	0.99999	12	18	24	23	0	30	12	26	19	24	27	30	15	6.99999	18	15	28	19	16	26	6	9.99999	3	30	12	5.00001	21	8.00001	30	23	20	18	20	6	9.99999	6	30
	28.75	30	30	0	30	28	5.00001	0	20	29	25	9	18	20	20	17	0	30	20	27	18	23	18	22	18	18	9.99999	25	27	23	22	30	24	20	16	28	26	24	24	12	24	12	27	13	23	22	17	25	26
	29.25	22	24	0	20	29	15	6	30	30	24	17	28	14	9.99999	26	6.99999	30	27	19	22	26	30	12	23	28	5.00001	27	17	29	18	28	19	22	23	27	6	16	21	19	27	15	27	23	25	17	3.99999	13	30
	29.75	29	30	17	28	30	3	24	30	30	30	30	30	14	27	29	0	30	26	9.99999	15	27	28	30	30	30	9	25	30	22	28	30	30	23	30	30	25	26	24	20	30	26	20	19	30	17	20	27	30
	30.25	30	30	29	26	30	23	30	28	30	23	30	23	30	30	30	3	30	29	21	15	30	17	30	22	23	30	29	29	30	18	27	30	19	30	30	25	30	22	25	26	27	30	30	30	30	30	25	30
	30.75	30	19	30	29	29	29	30	28	30	23	29	30	25	30	18	17	30	30	28	12	30	30	30	28	26	29	22	30	30	24	30	26	22	30	29	30	30	30	12	30	29	30	30	30	30	30	30	24
	31.25	30	18	16	26	29	26	30	27	30	29	30	20	29	30	19	24	22	27	27	21	24	28	30	30	26	26	30	30	30	30	30	30	20	30	27	30	30	30	30	30	30	20	30	24	30	30	30	29
	31.75	30	30	30	30	29	28	30	30	27	30	28	22	25	30	30	26	30	29	19	26	26	30	30	30	29	30	30	30	30	30	30	30	17	30	25	30	30	30	30	30	30	28	30	30	30	30	30	30
	32.25	30	30	19	19	30	14	30	28	30	30	30	25	29	21	30	30	26	30	5.00001	28	30	25	30	30	23	30	30	30	30	19	30	30	30	27	30	30	28	30	21	30	30	14	30	30	30	30	30	30
	32.75	20	27	20	15	30	23	26	29	24	30	25	24	25	30	21	23	25	27	0	21	27	23	30	30	28	30	30	29	30	0	30	30	30	30	28	30	26	28	28	27	30	30	30	30	30	30	30	30
	33.25	30	25	11	26	27	23	27	30	30	22	30	24	12	30	14	15	22	26	17	20	29	25	30	30	28	30	30	30	30	30	30	30	30	30	30	23	30	27	30	30	26	27	30	30	30	30	30	29
	33.75	28	24	28	15	28	25	25	27	12	24	21	26	19	24	21	20	5.00001	22	19	18	29	30	30	30	30	30	30	30	25	30	27	29	30	30	29	28	28	28	30	30	30	30	20	30	30	30	30	28
	34.25	30	28	9	6	29	2.00001	27	18	12	28	16	26	19	27	19	5.00001	0	12	30	14	23	26	30	30	30	30	21	30	29	30	27	25	29	30	23	23	28	30	30	30	30	27	29	27	30	30	30	30
	34.75	21	17	0	0	26	0.99999	2.00001	0	6	30	5.00001	28	15	0	15	6	0	5.00001	21	22	9	6	30	30	30	27	28	26	30	27	30	30	22	28	18	30	20	24	29	13	30	25	23	28	30	27	28	30
	35.25	0	11	0	21	6.99999	6.99999	6	6	6	9.99999	0	0	0	25	0	0	0	0	0	13	17	21	28	18	26	30	22	30	30	27	30	30	30	23	30	26	18	30	30	29	26	25	26	28	30	28	13	29
	35.75	11	0	5.00001	3	5.00001	5.00001	0	8.00001	0	6	0	0	0	3	6.99999	3	9	0	0	8.00001	0	16	3.99999	12	16	23	2.00001	9	11	18	2.00001	22	20	0	20	3	2.00001	24	22	3	2.00001	6.99999	19	20	3	0	0	8.00001
	36.25	12	0	0	6.99999	0	0	0	9	6.99999	5.00001	0	0	0	18	15	3	0	0	0	11	0	3.99999	6.99999	27	24	21	19	30	16	14	0	30	28	0	30	12	0.99999	0	20	6.99999	5.00001	22	25	27	0	8.00001	3.99999	30
	36.75	30	23	0	30	0	0	5.00001	3	18	6.99999	0	0	21	17	26	14	25	6.99999	0.99999	0	16	6.99999	0	27	26	21	13	25	27	5.00001	11	30	0	0	30	18	5.00001	9.99999	14	3	13	0	18	12	6	13	0.99999	20
	37.25	25	30	0	30	6	0	18	25	21	0	0	6.99999	6.99999	30	28	23	24	30	30	15	19	3.99999	24	30	30	20	25	30	30	25	23	30	6	0	25	26	3.99999	15	5.00001	21	6.99999	24	30	28	17	24	0	30
	37.75	30	28	0	25	29	20	30	11	30	21	0	28	27	30	30	24	30	29	30	28	30	30	28	30	30	29	24	30	30	26	11	30	6	9.99999	23	26	19	26	23	15	30	22	26	29	25	29	3.99999	25
	38.25	28	26	0	24	30	23	30	11	20	3	16	24	25	30	30	18	30	25	30	22	9.99999	30	21	30	24	30	27	30	30	30	30	27	15	29	27	30	28	30	30	21	13	22	30	30	30	30	28	30
	38.75	30	30	0	30	26	23	30	19	13	17	6.99999	30	20	30	30	29	30	20	30	24	28	30	29	30	28	26	30	28	15	29	30	30	25	30	14	30	30	29	23	24	13	27	30	30	30	30	30	30
	39.25	30	30	14	30	30	23	30	18	28	24	20	21	30	30	30	21	30	30	20	30	27	30	30	30	27	25	30	17	30	23	30	30	22	30	27	30	29	30	30	30	19	28	30	30	30	5.00001	30	30
	39.75	30	19	21	30	30	24	30	24	21	30	27	24	22	30	17	23	29	26	0.99999	20	24	30	30	30	30	21	30	30	30	30	30	28	29	30	26	30	24	30	30	29	22	29	30	29	28	9	5.00001	30
	40.25	23	29	3.99999	22	30	26	30	13	18	22	24	30	22	19	30	28	28	26	29	19	19	9	20	30	30	30	22	21	30	29	30	25	18	30	28	30	9	27	30	30	30	29	30	30	24	15	14	30
	40.75	30	27	9.99999	17	18	14	30	30	30	29	20	27	30	29	30	28	30	13	30	28	20	30	24	30	30	24	30	20	30	25	25	30	30	30	26	30	25	30	30	19	30	17	30	30	30	30	30	30
	41.25	29	30	15	25	30	24	30	28	20	29	20	21	15	30	29	26	30	16	30	30	24	22	30	30	23	24	17	26	30	28	29	30	30	30	20	30	24	28	30	22	30	20	30	30	30	30	30	21
	41.75	27	22	26	30	18	9	30	17	30	30	30	30	9.99999	19	17	21	30	6.99999	30	23	25	18	30	28	24	30	30	12	30	19	28	24	13	30	30	30	30	23	30	8.00001	30	26	29	24	30	16	22	30
	42.25	30	30	0	22	26	21	30	25	20	24	21	22	27	30	30	12	23	22	30	28	16	24	30	20	23	18	27	22	30	30	20	30	2.00001	30	30	14	30	30	30	30	23	27	30	30	26	25	28	30
	42.75	23	30	17	24	25	30	18	28	30	21	20	30	25	30	30	30	30	30	30	30	20	15	30	16	30	23	17	9.99999	20	30	29	29	19	30	27	30	30	30	21	30	30	22	30	30	30	20	30	26
	43.25	26	30	16	26	30	30	30	30	30	30	8.00001	23	29	30	24	17	25	25	30	24	19	30	30	16	30	12	30	28	30	30	8.00001	30	9	21	27	30	27	15	30	30	30	22	30	30	30	5.00001	20	19
	43.75	30	27	5.00001	30	20	30	30	30	22	30	30	26	30	24	30	30	29	24	27	13	20	30	30	30	30	18	30	22	30	30	20	30	29	30	30	30	21	11	30	30	30	30	30	27	30	20	30	30
	44.25	30	30	13	30	30	14	30	16	9.99999	28	23	28	30	30	18	24	30	26	26	28	22	30	30	30	30	9	13	21	30	30	24	30	19	21	30	30	30	26	30	30	14	23	9.99999	30	30	13	30	30
	44.75	25	26	11	12	20	6	16	30	22	28	30	5.00001	17	30	30	19	30	25	24	29	13	13	30	30	30	17	23	29	30	17	29	30	30	29	30	30	30	30	14	24	21	14	21	23	23	30	30	25
	45.25	29	12	8.00001	30	29	23	30	16	18	25	26	28	12	14	20	30	30	15	20	29	19	30	30	28	30	23	23	30	28	5.00001	30	30	30	30	30	30	6	15	8.00001	30	27	25	25	30	26	18	30	30
	45.75	17	11	6.99999	24	26	28	15	26	30	30	13	9.99999	29	30	16	25	30	30	8.00001	30	26	20	30	30	30	8.00001	30	30	27	28	30	28	30	30	27	30	12	22	28	30	19	21	20	26	30	0	30	30
	46.25	26	27	3.99999	23	29	17	23	27	22	22	24	30	25	24	27	29	30	20	19	29	26	17	30	22	30	27	30	30	30	30	23	30	2.00001	30	28	17	16	30	29	30	26	17	30	25	26	15	6.99999	30
	46.75	29	20	21	19	22	30	30	17	11	30	29	23	29	19	24	23	30	29	30	25	9	30	30	28	30	14	30	27	30	30	30	30	16	30	30	29	30	29	30	30	24	26	30	30	24	27	18	30
	47.25	25	22	0	9	30	3.99999	19	30	21	21	0	11	14	28	22	16	30	0	16	16	15	13	24	29	30	25	30	24	28	26	19	30	30	28	30	28	20	29	25	30	26	6	29	26	24	9	30	30
	47.75	16	3	0	0	3.99999	11	0	11	6	11	0	0	9.99999	0	2.00001	0	29	0	5.00001	17	2.00001	14	24	22	20	27	26	29	24	17	25	20	28	23	22	18	21	26	29	21	16	29	25	24	19	27	28	24
	48.25	24	26	22	22	27	22	6.99999	17	25	28	25	0	18	26	18	28	25	22	22	28	6	20	23	25	20	30	29	30	30	29	24	11	30	29	24	26	30	30	28	15	30	27	30	28	12	25	27	30
	48.75	22	28	19	24	30	30	8.00001	29	30	22	18	5.00001	28	29	30	26	15	21	17	30	6	23	26	22	28	29	27	30	21	29	23	26	30	27	28	27	28	30	30	21	30	30	30	21	21	29	30	27
	49.25	11	30	13	25	20	20	25	24	26	22	17	18	18	25	26	11	0	28	9.99999	22	17	9.99999	24	22	26	30	30	30	3.99999	30	21	26	16	28	20	30	30	30	22	25	30	30	28	15	14	26	24	28
	49.75	30	30	23	30	18	28	27	17	24	29	6	5.00001	0	17	6.99999	0	5.00001	15	13	30	6	13	28	24	28	30	30	30	15	30	12	27	15	24	21	19	28	25	30	22	30	27	29	25	16	25	28	22
	50.25	20	22	27	29	17	13	19	27	30	29	11	9.99999	18	0	20	5.00001	0	29	27	26	18	19	26	27	19	26	30	28	22	30	21	30	25	27	13	26	30	30	30	30	26	29	27	30	27	26	23	28
	50.75	25	30	23	22	15	27	23	26	30	24	11	24	26	26	14	9	26	30	29	29	2.00001	26	30	28	25	27	30	30	22	30	25	30	16	30	21	25	30	25	29	28	30	30	27	28	30	28	29	27
	51.25	30	30	27	30	22	30	24	28	30	30	19	28	14	12	17	16	24	24	30	30	22	30	30	28	17	30	30	27	15	30	30	26	26	25	30	30	27	30	27	27	30	30	30	30	30	28	26	19
	51.75	22	18	26	30	29	12	30	25	30	30	22	30	16	25	20	29	21	30	26	25	12	26	28	28	26	28	30	30	19	29	30	30	26	30	22	21	30	30	26	30	28	27	24	28	26	22	30	9
	52.25	30	22	30	26	30	30	26	28	30	28	12	30	30	30	20	30	22	30	26	30	25	20	29	30	28	29	26	23	23	28	26	30	27	30	25	26	30	25	27	30	30	30	29	30	30	30	29	8.00001
	52.75	30	29	25	28	30	30	26	30	29	30	30	30	30	30	23	30	19	28	29	30	29	29	26	30	30	30	30	30	23	30	30	26	30	30	26	30	30	30	30	28	30	30	24	30	30	26	30	15
	53.25	30	30	28	30	30	30	30	30	30	30	30	30	30	29	30	30	28	29	30	30	30	22	30	30	29	30	30	30	29	30	24	30	30	24	20	30	29	30	30	24	27	30	23	30	26	30	28	30
	53.75	30	27	30	30	30	18	26	30	30	30	30	30	29	30	28	30	29	23	29	20	29	30	25	27	26	30	30	25	24	25	30	30	24	30	16	30	30	30	30	30	28	30	13	30	30	30	30	30
	54.25	30	3.99999	23	30	30	21	23	30	30	30	30	30	30	30	20	30	28	25	30	30	30	30	30	29	30	30	30	29	30	30	30	30	25	30	27	30	26	30	30	30	27	30	26	30	30	30	30	30
	54.75	30	29	30	30	23	22	30	30	29	30	30	30	30	30	29	28	24	30	30	30	30	30	30	30	30	30	30	30	30	30	30	30	30	30	27	30	30	30	30	30	30	30	30	30	30	30	30	30
	55.25	30	30	28	29	30	14	27	30	30	27	30	30	29	30	8.00001	30	30	30	30	27	30	29	30	30	30	30	30	30	30	29	26	30	30	28	26	30	30	30	30	30	30	30	30	30	19	30	20	30
	55.75	30	22	27	29	30	29	30	30	30	30	30	28	30	28	19	30	29	29	28	25	30	30	30	30	30	30	26	29	30	30	30	28	19	30	30	30	30	30	30	30	30	30	26	20	29	30	26	30
	56.25	21	28	30	30	30	29	30	26	19	30	30	30	30	30	20	30	28	30	30	30	30	30	30	30	25	30	30	30	30	30	27	30	30	30	24	30	30	30	30	30	30	30	30	21	30	30	29	30
	56.75	30	26	30	30	30	30	28	27	6.99999	25	30	30	30	30	26	30	26	25	29	22	28	30	30	30	30	30	30	17	22	17	30	28	30	30	30	30	30	30	25	30	30	30	28	20	30	30	18	30
	57.25	30	30	28	30	27	28	30	30	29	30	27	30	30	30	18	23	17	24	30	22	30	29	27	30	30	30	30	29	30	22	26	30	30	30	30	30	27	28	30	30	30	30	30	23	30	30	27	30
	57.75	30	30	30	30	29	26	30	30	30	30	30	25	27	30	30	29	18	27	30	27	30	30	28	30	30	30	30	30	30	30	30	30	30	30	27	27	30	30	30	30	30	30	27	30	30	26	30	30
	58.25	26	26	26	21	30	30	27	28	23	21	30	24	28	28	8.00001	19	9	28	11	19	29	27	29	30	30	30	30	29	30	30	28	27	30	30	30	30	30	29	30	30	30	30	30	30	30	30	30	30
	58.75	25	28	27	26	30	30	27	30	25	26	24	25	0.99999	25	8.00001	6	0	30	19	19	20	30	25	30	30	30	30	30	30	30	29	30	25	26	27	30	30	30	25	30	27	30	26	30	25	30	29	30
	59.25	25	26	0	9.99999	11	26	23	17	27	28	12	30	0	23	5.00001	14	5.00001	12	6.99999	6	0	5.00001	29	30	26	30	30	29	28	28	30	27	30	30	28	30	28	30	29	22	26	30	30	30	24	29	30	30
	59.75	23	16	0	0	18	27	24	14	28	3.99999	0	6	14	3.99999	12	5.00001	9.99999	0	0	0.99999	5.00001	0	3	26	3	24	22	23	9.99999	21	2.00001	22	12	28	8.00001	9	25	15	27	19	27	27	11	3	0	13	6.99999	25
	60.25	23	19	0	18	3	25	2.00001	14	28	2.00001	0	0	19	24	16	15	0	0	0	25	0	6.99999	11	25	28	23	27	22	12	21	6.99999	30	13	18	9.99999	0	21	30	19	24	26	30	23	0	15	8.00001	8.00001	27
	60.75	23	30	11	26	21	30	30	0	29	6	0	6	30	24	22	26	19	23	0	30	0.99999	27	0	30	27	30	30	17	0	25	12	30	0	24	23	3	28	25	30	30	30	30	30	0	17	3	22	30
	61.25	30	30	20	30	27	30	30	30	25	6	5.00001	9.99999	30	23	30	29	30	30	14	25	30	29	20	29	28	30	30	30	23	30	6	30	0	30	16	25	20	23	17	30	27	30	30	14	0	8.00001	30	30
	61.75	30	24	27	30	29	30	30	21	28	9.99999	12	21	30	16	30	29	30	26	30	30	30	30	29	27	28	28	25	30	26	30	26	25	6	30	23	26	30	30	25	30	30	30	21	30	15	25	30	30
	62.25	30	6.99999	30	30	23	30	27	27	30	24	23	21	30	2.00001	25	30	30	30	30	27	25	30	30	30	23	30	30	25	30	29	21	30	17	28	20	24	29	28	18	26	27	30	9	16	16	28	30	30
	62.75	30	20	23	30	29	23	22	30	29	21	25	26	30	23	18	24	30	30	19	27	28	30	29	30	30	24	30	30	29	30	3	30	30	30	30	30	30	30	30	30	30	30	20	30	9.99999	27	25	24
	63.25	24	25	30	28	30	30	30	29	30	18	30	29	29	30	6.99999	30	22	30	17	29	18	29	30	30	29	30	22	30	29	27	25	22	26	30	30	30	29	30	30	30	30	28	23	27	11	28	30	9
	63.75	17	30	26	30	30	15	26	20	24	26	30	16	28	30	26	20	24	28	14	22	30	30	22	26	26	30	30	30	29	22	30	30	30	30	27	30	26	30	27	26	27	30	20	28	12	28	30	30
	64.25	14	30	25	30	30	19	28	30	30	20	30	30	30	26	17	18	19	30	19	25	30	25	30	27	30	30	26	30	26	30	30	30	25	22	26	28	30	30	23	30	30	30	30	30	27	27	30	29
	64.75	28	27	30	23	24	12	30	17	30	29	15	21	30	30	26	19	28	25	22	29	25	30	30	30	25	30	30	27	29	30	22	30	30	30	30	25	30	26	30	30	26	30	30	30	25	27	30	29
	65.25	27	30	27	30	30	30	30	30	30	27	27	30	28	24	30	28	30	27	30	29	27	30	25	26	30	30	30	24	27	30	30	21	30	24	25	30	30	30	30	30	30	27	30	30	25	30	24	30
	65.75	6	23	26	27	27	30	24	30	29	27	30	26	26	30	14	28	26	20	29	27	17	23	30	30	30	30	24	30	30	30	30	30	21	30	30	23	30	30	30	26	30	30	28	30	30	25	30	30
	66.25	5.00001	30	30	30	30	25	30	30	30	28	24	25	23	30	16	18	28	29	25	26	23	20	30	30	30	14	30	30	30	25	27	30	30	30	30	30	28	30	27	30	30	30	30	28	30	28	25	30
	66.75	23	27	26	29	27	30	30	24	27	27	9	30	22	30	23	26	22	27	30	27	30	6	30	30	30	19	26	30	30	30	30	30	30	30	25	22	30	30	30	28	26	30	29	27	30	28	30	30
	67.25	22	30	27	30	27	30	18	30	30	27	27	24	8.00001	30	30	30	17	25	28	29	24	13	28	30	30	20	30	30	30	29	26	23	30	30	27	30	30	30	30	28	26	30	30	30	22	28	30	30
	67.75	13	30	30	25	25	30	30	30	30	20	23	30	25	26	28	24	23	27	5.00001	23	30	30	30	30	24	25	30	30	30	30	28	30	23	30	30	30	27	30	30	30	30	26	29	30	5.00001	30	30	30
	68.25	20	30	30	30	21	23	30	19	30	30	24	24	30	14	28	28	30	30	2.00001	27	29	29	23	30	30	30	30	30	19	30	22	30	30	30	30	26	30	26	30	30	30	30	18	30	6.99999	25	30	24
	68.75	30	28	26	26	21	22	24	30	30	25	18	25	28	22	30	19	26	22	14	28	30	30	30	26	27	30	30	26	30	30	29	30	30	28	19	26	28	27	13	30	26	26	30	23	30	30	20	30
	69.25	29	27	30	25	30	22	30	30	24	30	15	30	30	8.00001	28	30	30	21	30	30	29	24	30	26	30	30	30	30	25	30	30	23	30	30	30	30	29	30	13	30	26	29	30	27	30	30	30	30
	69.75	30	23	27	19	30	30	30	29	30	22	29	27	28	30	15	28	25	22	26	26	22	30	30	29	30	30	30	30	30	30	30	0	30	30	30	30	28	27	30	30	30	30	30	30	30	30	30	30
	70.25	27	26	30	5.00001	22	30	24	30	27	30	24	30	24	22	30	30	30	23	30	28	8.00001	24	30	30	30	30	30	30	30	30	22	6	25	30	30	26	30	30	30	30	27	30	30	28	27	26	25	30
	70.75	30	30	5.00001	21	26	23	30	30	30	23	30	16	25	30	28	27	30	28	25	30	21	28	25	30	30	30	30	28	30	30	30	0	30	30	28	20	30	26	28	30	30	30	26	3.99999	30	30	28	29
	71.25	25	28	17	30	11	30	30	24	30	30	23	27	25	27	28	24	30	30	30	29	24	26	30	30	30	30	28	17	30	30	30	0	30	30	27	29	30	29	12	30	30	30	30	25	28	30	30	30
	71.75	5.00001	26	24	11	24	26	25	30	25	24	25	14	27	0	30	27	25	16	23	25	0	24	25	6	5.00001	21	21	5.00001	3.99999	12	0	11	0	17	12	6	8.00001	12	27	15	24	5.00001	0	5.00001	0	16	25	0
	72.25	17	16	9.99999	5.00001	0	9.99999	0	17	19	17	0	0	0	0	6	6.99999	6	5.00001	5.00001	6.99999	0	0	23	26	21	27	14	20	25	22	6	12	9	13	24	27	22	19	25	22	27	26	18	6	5.00001	25	28	20
	72.75	18	14	12	26	21	9.99999	5.00001	16	8.00001	19	0	11	0	0	16	15	9.99999	0	6	16	0	0	25	21	16	29	30	19	27	16	18	18	6.99999	22	18	29	18	24	28	28	30	22	15	15	19	30	26	9.99999
	73.25	19	25	15	24	15	11	13	27	21	14	0	6	16	13	20	3.99999	12	13	6.99999	23	0	8.00001	15	27	17	28	30	28	30	24	11	18	27	17	24	27	26	23	16	25	26	28	18	6	12	30	27	9.99999
	73.75	24	29	16	19	6	22	18	25	15	17	6	5.00001	0	6.99999	15	13	0	18	24	16	0	11	30	23	19	20	30	20	28	24	15	26	19	21	20	30	14	25	16	27	25	21	9.99999	5.00001	22	19	27	14
	74.25	25	27	9.99999	15	21	16	21	28	27	26	11	11	6	5.00001	21	6.99999	13	26	24	9.99999	9	17	20	25	17	27	25	13	9.99999	27	19	17	24	22	24	23	29	23	13	27	25	28	24	22	28	25	30	16
	74.75	22	26	26	26	19	23	21	30	22	27	5.00001	14	12	13	20	17	9.99999	26	29	18	25	22	22	23	19	27	18	27	30	27	22	25	27	15	26	30	19	25	27	19	28	26	22	12	30	18	27	22
	75.25	26	30	21	25	26	20	25	25	28	30	5.00001	16	14	29	25	23	6	26	30	20	26	22	30	28	28	27	28	22	26	15	25	29	30	25	27	28	27	29	25	19	30	24	19	14	25	30	26	26
	75.75	25	27	14	25	25	28	27	26	30	27	18	30	24	27	18	13	18	25	28	25	24	26	23	24	20	25	29	21	30	18	23	15	30	25	28	30	25	25	20	27	30	28	26	22	29	26	30	21
	76.25	29	30	30	30	23	25	27	25	25	30	27	30	16	26	30	21	24	30	30	26	23	27	26	30	23	20	27	20	30	30	27	20	30	23	28	30	25	25	30	23	23	26	29	25	27	30	30	19
	76.75	27	26	20	30	30	26	22	29	30	26	27	30	18	24	29	30	25	27	30	27	25	29	27	22	28	24	30	28	27	29	20	25	25	25	30	30	29	25	28	30	27	30	28	20	26	30	30	19
	77.25	30	30	26	30	26	19	30	30	26	30	24	30	29	30	25	26	24	30	30	25	29	30	30	25	26	30	30	23	30	30	21	27	30	23	27	20	27	30	24	22	30	27	30	26	26	28	29	24
	77.75	25	30	25	28	30	30	30	30	30	30	30	30	30	30	29	26	23	30	30	29	30	29	30	25	24	30	24	23	30	30	20	21	30	26	30	30	30	24	22	29	30	23	29	20	29	30	30	17
	78.25	30	26	30	30	27	30	27	30	30	30	28	30	30	30	29	24	30	30	30	21	29	30	26	30	30	27	30	23	23	30	24	30	30	30	30	30	26	30	30	30	30	30	30	27	29	28	30	28
	78.75	25	30	25	30	29	30	29	30	30	30	28	30	30	29	24	22	28	30	30	30	29	30	30	30	29	30	30	28	30	30	25	26	30	24	30	26	30	30	26	30	30	27	30	27	27	24	30	30
	79.25	30	26	25	30	30	29	29	30	30	30	30	30	30	30	30	28	23	30	30	22	26	30	30	30	30	30	30	29	30	30	30	30	30	27	30	30	30	30	30	30	30	30	25	30	26	30	30	30
	79.75	29	30	24	30	30	29	30	30	30	30	28	30	30	30	26	29	30	30	30	22	30	30	30	30	30	30	30	24	29	30	27	30	30	30	30	30	23	30	30	27	30	30	24	30	27	30	30	30
	80.25	30	30	26	19	27	30	26	30	30	30	30	30	30	30	26	28	22	30	30	22	28	29	30	30	30	30	30	27	30	30	30	30	30	30	30	29	30	30	30	30	30	30	28	30	28	26	30	30
	80.75	30	30	29	30	24	26	26	30	28	27	23	30	30	27	24	25	24	26	30	24	30	30	30	30	30	30	26	20	24	30	30	30	30	23	27	28	30	30	30	30	30	30	26	30	30	30	26	30
	81.25	30	27	29	30	16	30	25	30	30	29	30	30	29	29	28	27	25	29	30	21	25	28	30	30	30	30	30	28	25	30	27	30	30	30	30	30	30	30	30	30	30	30	29	30	30	30	30	29
	81.75	29	29	25	25	30	20	25	30	26	26	25	30	28	30	29	29	16	30	30	12	28	28	30	30	30	30	27	29	30	30	30	24	30	30	28	30	30	28	30	30	30	30	29	30	26	30	30	29
	82.25	23	25	28	19	29	23	28	17	24	30	27	17	27	29	28	20	12	29	29	22	30	29	30	30	19	28	30	30	30	29	30	30	30	26	27	30	30	26	30	28	30	30	22	30	28	21	30	30
	82.75	29	29	29	23	26	30	25	28	30	26	15	30	25	27	24	17	5.00001	24	22	24	6	28	30	30	30	29	20	30	30	30	30	28	30	30	30	28	30	30	24	30	30	30	26	21	26	27	30	30
	83.25	25	6	26	12	26	20	23	26	30	20	5.00001	30	5.00001	12	17	11	15	29	16	25	0	25	30	30	30	27	30	18	30	24	26	29	30	30	25	28	30	30	26	27	30	30	30	30	26	30	30	30
	83.75	22	0	21	11	24	17	17	30	19	0.99999	6.99999	17	0	13	15	6	0	13	2.00001	28	0	6.99999	15	15	23	23	3	6	3.99999	16	6	13	3	18	0.99999	17	19	18	20	26	22	23	20	3	8.00001	17	20	2.00001
	84.25	16	13	0	5.00001	0	15	14	2.00001	2.00001	0	0	2.00001	8.00001	0	19	9	0	6	0	29	0	12	30	21	27	23	30	18	22	26	25	24	0	17	20	9	30	16	30	24	22	28	8.00001	5.00001	6	13	30	0
	84.75	29	21	3	20	5.00001	27	22	21	22	21	0	14	16	24	23	26	17	25	6	27	0.99999	15	27	26	26	12	30	13	18	25	27	17	14	23	15	6.99999	30	20	25	30	30	26	0	15	6	0	30	8.00001
	85.25	30	30	18	17	27	30	27	26	30	20	0	5.00001	28	30	28	24	25	23	30	21	17	28	16	24	21	23	30	9.99999	19	22	28	11	28	12	0	16	25	21	19	26	27	30	21	22	0	23	30	24
	85.75	29	30	12	30	27	30	17	29	30	24	5.00001	28	30	30	25	30	30	30	30	27	14	30	30	30	29	25	30	30	30	30	30	22	30	20	8.00001	30	30	19	30	22	30	30	6	26	13	26	27	27
	86.25	30	30	24	11	20	19	26	22	30	24	13	30	23	28	30	24	30	27	30	29	29	19	30	25	28	30	23	24	30	21	17	20	25	28	9.99999	26	30	30	30	30	29	28	23	30	13	27	14	28
	86.75	29	30	23	14	29	30	28	30	30	23	19	30	27	25	23	30	23	30	30	29	20	30	30	28	30	29	22	21	30	28	9.99999	30	22	30	9.99999	29	24	26	27	30	30	26	23	22	16	30	13	30
	87.25	29	30	20	21	25	30	24	29	30	19	8.00001	30	28	30	27	27	30	21	30	29	22	29	27	20	26	26	27	28	30	24	30	26	26	16	20	30	30	30	30	27	30	30	22	28	25	30	24	30
	87.75	29	30	27	20	22	26	26	20	23	20	25	23	30	30	27	26	30	28	30	29	17	30	27	27	30	30	30	30	30	20	29	26	19	27	0	27	30	25	24	25	19	22	30	27	19	24	30	30
	88.25	30	30	23	16	29	30	26	30	30	13	21	30	29	24	27	30	24	15	30	28	30	30	30	30	30	27	23	30	28	26	24	30	30	24	6.99999	28	24	27	30	28	27	30	24	30	19	30	30	24
	88.75	30	30	26	26	26	18	30	25	30	26	29	27	30	23	24	29	14	16	30	28	30	28	30	18	28	30	15	22	30	30	30	20	24	26	11	30	30	28	30	30	24	28	26	19	27	30	30	23
	89.25	30	23	27	30	21	9.99999	28	30	23	21	17	13	30	29	30	25	30	30	30	28	30	30	23	27	30	25	30	24	30	27	23	30	30	23	30	28	23	28	30	30	20	30	27	30	21	30	30	30
	89.75	30	19	22	30	25	25	25	30	30	26	25	18	30	30	27	26	28	26	30	24	14	30	30	28	30	30	30	26	26	27	27	26	30	30	3.99999	30	30	30	30	27	30	27	21	30	25	30	30	30
	90.25	30	30	24	23	30	30	28	19	30	27	30	30	30	30	30	18	28	29	30	26	30	30	20	30	30	30	23	28	30	25	28	30	30	30	6.99999	24	25	22	30	27	16	30	30	22	27	25	25	27
	90.75	29	28	21	30	26	30	26	30	30	27	24	26	30	30	30	19	19	25	30	23	30	26	30	27	30	24	30	30	30	30	30	30	30	25	6	30	30	28	30	30	12	30	23	26	29	30	30	30
	91.25	27	30	30	30	24	25	27	30	24	21	30	30	22	30	29	21	22	30	30	23	27	30	30	30	30	30	30	30	30	22	30	25	21	30	25	28	30	23	27	19	3	30	30	30	29	30	30	30
	91.75	18	30	27	30	30	24	30	30	30	30	25	30	22	30	30	30	19	29	30	26	30	30	30	30	30	30	30	30	22	30	30	30	28	26	24	30	30	30	30	30	30	30	30	30	25	30	30	30
	92.25	20	30	27	30	27	25	23	30	30	30	25	26	30	30	29	29	26	28	30	25	22	3	30	29	30	30	30	30	30	29	30	24	30	29	30	28	30	30	29	30	30	25	30	25	26	28	30	21
	92.75	29	29	27	30	27	8.00001	30	25	27	23	30	30	30	29	30	27	21	30	30	26	30	24	30	21	25	25	15	19	20	16	30	30	30	30	21	29	30	30	30	30	30	30	30	26	25	30	26	30
	93.25	28	30	27	23	30	27	30	30	29	30	24	15	30	29	30	30	26	29	26	26	29	30	19	30	20	30	30	25	13	30	30	30	30	30	30	29	30	30	30	30	30	30	23	29	23	25	30	30
	93.75	30	25	27	30	28	29	22	30	23	24	30	27	28	30	29	30	29	26	27	28	25	25	30	30	30	30	30	30	30	24	30	30	30	30	30	29	30	26	27	20	30	30	30	16	20	30	27	30
	94.25	30	30	29	30	28	22	29	28	29	30	27	30	30	30	29	27	17	27	30	18	20	30	30	30	30	25	30	30	30	30	30	30	30	30	24	30	30	30	29	27	22	30	30	23	23	25	28	27
	94.75	21	30	28	30	26	26	30	30	30	30	30	24	27	17	30	30	16	25	29	18	30	30	30	28	21	30	21	24	30	30	30	30	30	30	25	25	24	30	27	30	30	30	30	22	30	19	30	30
	95.25	30	25	28	27	30	23	26	30	17	18	27	20	30	30	30	29	30	9.99999	30	17	30	30	26	30	30	25	30	30	30	30	25	30	30	30	27	30	30	30	30	28	30	30	30	30	25	21	29	30
	95.75	25	30	26	23	26	30	23	26	18	24	23	11	29	30	30	24	30	26	26	30	6.99999	28	19	15	12	9	20	16	14	16	14	11	9.99999	0	0	9.99999	9.99999	26	8.00001	17	14	25	12	5.00001	0	8.00001	5.00001	27
	96.25	18	20	6	18	18	17	11	0	17	6	6	0	6	5.00001	9.99999	0	0	3	0	0	0	0	22	30	20	2.00001	21	24	30	27	24	18	20	0	21	28	28	16	16	21	9.99999	24	23	20	0	18	13	19
	96.75	22	20	16	24	9	23	22	0	22	0	0	9	9	18	12	0.99999	8.00001	26	0	6.99999	20	8.00001	30	30	22	2.00001	28	29	28	30	24	24	22	13	19	30	27	22	21	27	22	22	22	20	0	25	21	23
	97.25	23	27	21	11	9.99999	6.99999	26	17	16	6.99999	14	16	23	19	20	16	25	23	14	6.99999	14	0	28	29	25	9	13	16	30	20	25	22	23	17	27	30	30	20	27	24	24	23	18	25	0	24	17	24
	97.75	24	17	17	19	23	19	28	19	23	16	24	24	21	24	20	18	18	14	9	11	0	6.99999	30	23	30	20	30	30	29	26	25	19	24	17	21	23	28	21	30	23	21	27	27	25	0	22	30	26
	98.25	27	27	11	23	21	24	25	14	27	12	0	22	20	21	27	13	29	23	0	15	9.99999	8.00001	30	21	23	18	28	24	23	26	25	30	26	19	26	19	26	28	20	28	20	28	25	23	6	25	23	28
	98.75	26	26	18	27	22	22	30	21	25	15	14	26	19	18	21	29	27	24	5.00001	23	11	30	22	25	19	15	24	30	26	22	26	27	20	26	25	24	27	26	27	20	13	27	12	24	19	23	15	22
	99.25	25	24	25	26	15	27	25	25	25	17	21	26	23	21	26	19	23	29	17	21	17	28	30	26	22	5.00001	25	30	9	30	30	18	22	30	22	27	26	25	30	28	28	25	26	30	6	24	22	30
	99.75	27	30	25	23	28	26	27	25	29	24	28	24	29	21	25	21	24	26	19	26	24	30	28	27	24	17	26	20	28	27	24	16	25	27	25	27	30	27	27	22	20	28	28	26	19	22	24	22
	100.25	27	22	24	22	23	29	30	30	25	27	27	26	30	24	27	15	29	26	29	26	26	28	27	30	30	22	30	27	30	30	28	15	30	30	26	27	29	28	26	23	20	27	25	24	16	25	28	28
	100.75	27	30	25	13	30	24	29	24	30	19	30	28	30	22	28	25	27	29	30	29	24	30	30	30	16	28	25	30	30	28	25	27	19	30	25	30	21	24	29	19	30	27	29	30	15	24	29	29
	101.25	27	19	26	30	30	27	25	29	30	21	30	30	30	26	29	27	30	30	30	29	30	30	28	20	23	30	24	30	22	14	29	28	28	30	25	30	29	27	27	16	30	27	28	28	24	19	28	30
	101.75	29	30	30	27	28	30	30	30	30	30	30	29	30	30	30	22	30	30	26	26	30	30	30	30	24	29	28	30	30	30	25	29	25	30	25	27	30	30	28	22	27	30	18	26	19	29	27	30
	102.25	29	29	30	25	30	24	30	27	30	26	30	30	30	25	30	26	30	30	30	28	30	30	30	30	23	17	29	30	30	30	30	27	26	30	25	27	23	27	30	28	30	30	24	30	27	23	27	28
	102.75	30	25	25	30	30	28	28	25	30	25	30	30	30	28	29	26	29	30	30	30	30	30	30	30	19	23	29	30	18	22	30	30	27	30	22	30	30	30	30	27	26	30	30	30	30	24	27	30
	103.25	27	30	30	24	28	28	30	24	25	30	30	25	30	29	29	17	29	30	30	29	30	30	30	30	30	30	30	30	19	30	27	30	30	30	30	30	30	30	30	26	30	30	27	30	27	25	30	30
	103.75	30	29	30	29	19	28	30	22	30	30	30	28	30	24	30	28	30	30	29	30	30	30	30	30	24	30	30	30	27	30	27	27	26	30	26	30	30	30	30	30	27	30	30	30	27	30	30	30
	104.25	29	30	23	30	30	24	30	23	15	25	30	29	30	29	28	17	28	30	30	29	30	30	30	30	30	30	30	30	29	30	30	26	30	30	30	28	30	30	30	27	30	30	30	30	30	27	30	30
	104.75	30	30	30	30	18	28	30	30	30	29	30	30	30	28	29	27	28	30	30	27	30	30	30	30	30	30	30	30	28	23	30	30	30	30	22	25	30	30	30	30	27	29	30	30	24	22	30	30
	105.25	29	25	30	24	28	28	30	30	30	29	30	30	30	30	24	17	30	30	28	30	30	30	30	30	30	30	30	30	30	30	28	25	23	30	30	30	30	30	30	30	30	30	30	30	20	28	30	30
	105.75	29	25	29	28	30	23	25	29	29	30	30	29	29	27	29	25	28	30	30	29	30	30	30	30	30	30	30	26	28	30	30	30	30	30	30	30	30	30	30	29	30	30	30	30	30	26	30	30
	106.25	25	27	30	27	30	26	29	23	30	28	30	30	29	29	26	26	29	11	28	29	16	24	30	30	30	30	30	22	30	30	30	28	30	30	30	30	30	30	30	27	27	30	30	30	30	25	30	30
	106.75	27	30	21	29	29	24	27	24	28	24	30	15	30	30	22	12	30	17	25	20	30	30	25	30	30	28	30	27	30	30	28	30	27	28	25	30	25	30	28	18	30	30	30	30	25	28	30	30
	107.25	26	26	0	28	21	27	26	16	30	23	23	27	26	29	28	12	22	26	0	29	19	0.99999	26	30	30	30	30	30	30	25	25	30	27	30	30	28	30	30	30	19	27	30	25	30	27	30	25	30
	107.75	18	30	15	26	26	27	29	11	17	8.00001	21	5.00001	9	29	22	20	3	17	5.00001	15	18	0	18	20	9.99999	20	30	30	3	17	3.99999	3	5.00001	11	13	3.99999	16	25	15	16	27	22	20	6.99999	5.00001	14	6	20
	108.25	12	13	2.00001	25	5.00001	25	14	6.99999	3.99999	3	3	5.00001	16	30	15	9.99999	0.99999	3.99999	0	2.00001	3.99999	0	24	28	27	23	23	30	5.00001	11	0	15	17	0	20	3.99999	9	26	9.99999	6.99999	25	30	20	30	0	30	9.99999	26
	108.75	18	28	0	28	21	27	25	23	17	0	3	27	24	29	14	21	19	30	11	20	11	24	26	27	28	15	25	11	5.00001	25	9	23	22	0	17	17	5.00001	24	16	9	28	28	19	11	14	30	23	26
	109.25	19	30	11	29	28	25	30	30	17	19	12	30	23	29	29	28	21	30	22	30	25	30	21	28	30	5.00001	25	24	20	25	22	26	25	2.00001	19	0	6.99999	29	21	16	24	30	20	22	8.00001	29	9.99999	29
	109.75	20	30	30	20	27	19	20	30	16	22	24	30	30	30	25	29	27	30	30	29	30	30	25	25	22	28	30	30	17	24	13	30	21	29	22	24	21	27	22	26	28	30	30	16	12	29	26	26
	110.25	29	29	18	26	24	26	24	30	24	27	30	26	30	30	29	21	28	30	30	30	30	30	30	30	22	9.99999	30	23	22	23	18	23	13	30	27	18	30	29	27	27	26	27	21	15	24	29	26	30
	110.75	24	29	30	25	30	30	30	23	22	21	30	30	30	30	29	23	26	24	28	21	30	30	12	28	15	20	30	25	21	26	23	30	17	26	28	30	30	30	27	29	30	30	30	14	24	28	23	30
	111.25	16	30	30	24	18	23	22	30	21	26	30	30	30	30	28	24	15	30	30	28	25	30	29	30	27	29	21	28	30	28	23	30	24	30	21	20	22	26	21	30	25	30	30	21	23	26	24	29
	111.75	0	30	30	27	30	28	30	30	17	25	24	29	30	30	25	25	28	28	28	26	29	30	22	30	29	30	30	30	28	25	21	22	19	0	22	30	30	28	22	24	30	30	30	24	30	30	30	30
	112.25	23	30	18	26	24	27	30	29	23	25	30	29	30	30	24	25	26	22	30	24	27	30	30	24	9.99999	20	30	30	30	30	21	30	30	17	26	21	28	30	30	30	24	30	30	20	27	30	23	30
	112.75	27	28	30	30	30	28	26	30	23	29	30	30	30	26	20	23	28	30	28	27	30	30	18	30	30	30	25	22	30	29	30	30	13	18	19	29	30	22	23	30	27	29	24	26	20	30	30	23
	113.25	28	30	17	26	27	30	30	30	27	18	22	30	30	24	24	29	28	30	30	30	27	30	30	30	30	16	30	16	22	30	22	21	30	26	29	28	28	27	30	26	26	30	30	25	30	30	30	30
	113.75	30	30	30	29	29	17	30	26	25	21	30	30	26	30	24	23	24	30	30	29	30	25	30	21	30	11	30	30	28	20	30	30	16	23	30	15	28	30	25	22	30	30	30	29	24	30	30	30
	114.25	30	29	23	29	25	28	30	26	30	27	25	30	27	25	30	24	30	30	28	22	29	30	30	30	12	17	17	30	30	27	27	30	30	29	19	30	28	30	28	29	24	30	19	23	28	30	30	30
	114.75	29	30	30	22	28	29	30	30	22	28	30	30	26	29	25	24	30	29	30	23	30	30	30	30	28	22	28	30	30	30	25	28	23	26	30	20	30	30	30	27	30	24	30	22	28	30	24	29
	115.25	30	30	30	20	30	25	30	30	23	17	27	29	30	23	25	21	30	19	26	30	30	26	19	30	30	21	30	30	30	28	30	30	28	27	26	30	28	24	26	16	30	30	30	30	26	30	30	30
	115.75	25	29	9.99999	29	26	24	30	30	30	30	28	30	29	23	21	30	30	19	25	25	18	30	30	30	30	30	30	30	30	30	26	30	30	14	23	17	28	30	30	28	25	30	25	30	30	30	30	30
	116.25	29	30	30	27	29	28	28	12	22	22	30	30	30	30	27	30	30	30	27	24	30	30	30	28	30	30	30	30	30	30	30	27	25	28	30	13	30	30	30	29	26	30	30	30	23	30	19	30
	116.75	30	29	30	30	25	30	30	28	30	30	27	28	26	26	30	30	30	18	3	30	30	28	30	30	23	30	30	30	30	29	25	30	30	30	30	30	23	23	30	30	30	30	30	30	30	30	30	30
	117.25	26	30	22	27	30	21	30	30	30	25	27	30	30	30	16	24	25	14	21	25	24	28	30	30	27	30	25	30	30	30	24	23	30	30	30	20	28	30	30	27	30	30	26	30	26	30	30	30
	117.75	29	28	30	27	14	24	25	30	23	22	30	26	25	27	24	24	30	15	30	30	30	30	30	30	30	30	27	30	30	28	30	30	25	30	28	26	30	30	30	30	26	30	30	25	24	30	30	27
	118.25	30	22	30	30	12	25	30	13	30	30	27	29	24	28	28	25	26	27	24	29	23	30	30	30	30	30	30	30	30	30	26	30	30	30	27	30	29	30	30	27	25	30	30	30	29	30	30	30
	118.75	26	15	28	30	23	30	30	30	21	28	30	29	30	26	27	26	30	30	30	22	30	26	30	30	30	30	30	30	19	25	30	26	26	30	30	25	25	25	22	30	30	30	26	30	26	30	26	29
	119.25	30	26	30	30	30	29	30	30	29	30	30	28	30	26	30	22	29	30	30	25	28	30	30	30	30	30	26	30	30	30	30	30	30	30	30	11	30	30	30	30	28	29	30	26	29	30	26	30
	119.75	26	30	30	30	24	28	25	22	25	27	23	26	28	26	26	21	27	30	22	20	30	16
	n: Day sleep
	EEC>
	Normal food		1% H2O2		Normal food
	w1118	upd3 OE	w1118	upd3 OE	w1118	upd3 OE
	345	491	546	466	634	621
	352	483	544	508	617	693
	233	376	234	444	572	625
	324	622	495	563	621	669
	204	367	426	585	616	565
	369	610	264	395	602	669
	315	518	331	641	600	672
	339	644	493	509	633	684
	344	418	469	566	651	583
	513	446	540	449	643	683
	334	437	327	384	534	661
	332	165	346	561	558	650
	294	501	330	287	536	654
	368	543	417	596	597	671
	99		466	582	456
	42		224		518
	159		432		438
	345		336		599
	372		373		562
	529		357		588
	310		449		494
	288		435		568
	373		462		640
	358		514		566
	326		484		637
	507		468		638
	479		615		573
	410		449		592
	486		611		486
	253				253
	462				462
[truncated: 67 more columns]

## Sheet: Figure 3 - figure supplement 1
	Figure 3, supplement 1
	a: Day and Night sleep								b: Day sleep								c: Day sleep								d: Day sleep								e: Day sleep
									Day/Night 1 normal food		Day/Night 2,3 1 %H2O2						Day/Night 1 normal food		Day/Night 2,3 1 %H2O2						Day/Night 1 normal food		Day/Night 2,3 1 %H2O2						Day/Night 1 normal food		Day/Night 2,3 1 %H2O2
									Day 1	Day 2	Day 3	Night 1	Night 2	Night 3			Day 1	Day 2	Day 3	Night 1	Night 2	Night 3			Day 1	Day 2	Day 3	Night 1	Night 2	Night 3			Day 1	Day 2	Day 3	Night 1	Night 2	Night 3
	Day 1	Day 2	Day 3	Night 1	Night 2	Night 2			upd2-i SH/ +	upd2-i SH/ +	upd2-i SH/ +	EEC>upd2-i SH	EEC>upd2-i SH	EEC>upd2-i SH			upd3-i KK/ +	upd3-i KK/ +	upd3-i KK/ +	EEC>upd3-i KK	EEC>upd3-i KK	EEC>upd3-i KK			upd3-i TRiP/ +	upd3-i TRiP/ +	upd3-i TRiP/ +	EEC>upd3-i TRiP	EEC>upd3-i TRiP	EEC>upd3-i TRiP			upd3-i GD/ +	upd3-i GD/ +	upd3-i GD/ +	EEC>upd3-i GD	EEC>upd3-i GD	EEC>upd3-i GD
	275	299	365	631	465	612			255	471	485	516	506	468			211	315	397	574	437	452			107	346	278	331	390	292			327	499	472	427	465	567
	359	431	324	572	520	518			282	535	526	499	415	431			144	270	334	409	343	201			381	481	476	480	496	508			342	459	519	446	568	536
	330	355	368	532	581	526			306	424	387	218	384	418			322	378	435	688	480	368			142	376	348	370	590	489			473	495	540	566	568	550
	305	304	356	552	529	492			292	465	466	438	445	467			373	513	467	457	455	419			221	393	243	463	419	424			295	605	599	480	518	423
	314	267	361	526	565	573			261	372	451	384	455	397			391	439	493	231	331	89			345	473	415	488	536	592			337	416	489	391	459	444
	197	201	243	563	422	461			309	424	393	437	430	507			243	389	407	430	447	393			74	281	409	286	329	271			180	461	474	395	408	579
	215	180	220	510	443	453			398	370	337	483	431	448			332	361	440	467	417	495			256	445	470	481	522	530			506	406	383	593	620	656
	329	352	397	499	487	505			379	381	428	429	454	294			214	305	368	468	482	529			240	465	402	286	297	402			394	507	445	629	624	464
	217	313	374	510	478	538			231	534	540	306	398	456			462	468	513	436	528	505			228	378	283	343	435	462			551	384	452	371	523	500
	321	315	319	570	478	554			224	456	558	319	491	393			323	333	241	362	244	151			226	341	451	416	584	389			411	517	493	554	591	354
	441	505	457	547	540	571			368	444	490	499	453	527			188	421	408	443	437	461			272	435	543	415	442	368			221	568	563	460	448	511
	124	152	227	479	407	451			146	423	444	312	437	508			281	361	420	379	258	325			296	466	483	684	348	548			182	556	591	393	358	458
	169	184	161	421	484	397			209	532	486	334	529	615			328	388	425	364	411	421			311	531	414	345	493	360			157	521	549	428	507	672
	171	296	303	578	363	533			417	313	468	321	401	379			169	358	404	374	315	250			179	436	477	350	352	379			423	545	569	427	419	513
	243	308	283	449	355	473			322	432	445	527	604	587			258	355	433	360	437	420			232	463	504	244	394	471			466	549	530	479	580	435
	332	377	331	402	508	468			300	369	413	483	439	447			304	353	294	461	289	369			217	305	376	382	461	500			424	475	500	520	494	428
	316	430	396	598	520	515			312	428	461	465	465	478			160	176	271	356	565	533			270	382	262	371	351	322			383	422	452	350	455	526
	221	287	317	506	427	464			367	172	92	495	440	478			240	350	479	524	418	333			99	406	137	614	314	343			375	518	434	533	499	641
	171	177	221	508	482	428			312	216	391	413	376	399			305	412	408	349	462	391			63	227	447	348	472	362			619	488	527	517	472	661
	335	408	315	486	452	526			442	425	457	413	502				180	348	379	379	617	512			188	405	288	210	462	519			430	533	482	557	665	447
	298	414	366	568	525	527			393	212	240	421	494				621	592	585	522	518	445			251	391	91	449	387				382	449	485	389	622	279
	333	338	226	402	401	407			399	329	405						384	403	471	328	618	553			82	371	404	420	607				472	476	457	201	402	443
	425	513	517	651	680	685			214	506	535						268	361	350	653	515	540			167	398	450	283	403				340	526	571	545	346	470
	216	315	314	400	631	615			297	363	119						6	189	119	554	408	315			217	429	337	397	415				396	430	474	639	480	457
	174	254	330	521	573	497			249	343	295						301	434	382	284	466	447			373	419	348	474	285				448	486	484	483	509	607
	229	281	260	456	553	478			418	235	325						280	315	332	161	460	566			161	303	520	398	550				351	517	561	617	561
	255	305	323	489	382	421			321	516	510						362	435	438	249	453	417			351	512	496	270					379	509	478		542
	221	315	401	524	419	522			439	334	360						231	407	464	436	612	442			238	381	519	228					405	429	483
	283	306	298	482	486	522			296	342	428						342	457	479	402	415	363			256	473	547	399					437	505	453
	282	297	334	467	528	463			334	444	475						338	327	180	456	574	429			317	590	549						536	417	522
	368	407	339	533	477	594			387	361	362						275	343	396	337	365	169			257	414							288	480	495
	94	203	129	472	355	407			404	251	484						137	167	266						183	489							507	479	444
	f: TUNEL stain				g: TUNEL stain
	w1118	w1118 + 1%H2O2
	3	2
	4	4
	1	5
	4	2
	1	1
	0	1
	h: Sleep pattern
	Bin (hours)	voilaTS>																																voila TS>upd3-i KK
	0.25	0	0	0	0	0	6	0	6	0	0	0	0	0	15	0	0	0	0	0	0	0	22	0	6	5.00001	0	0	0	0	5.00001	0	0	23	0	8.00001	0	23	13	24	30	25	28	0	30	17	17	5.00001	5.00001
	0.75	0	0	0	0	0	0	0	0	0	0	0	0	6.99999	0	0	0	0	0	0	0	0	30	0	0	0	0	0	0	0	0	0	0	29	0	30	0	23	29	0	24	11	6.99999	0	22	0	0	0	0
	1.25	0	0	0	0	0	5.00001	0	0	5.00001	0	0	0	0	0	0	11	0	0	0	0	0	27	0	0	0	0	0	0	0	0	0	0	29	0	30	0	26	30	0	28	8.00001	16	0	28	0	0	0	0
	1.75	0	0	0	0	0	6	9	17	2.00001	0	0	0	2.00001	0	14	26	0	0	0	0	0	26	0	3.99999	0	0	0	0	0	0	5.00001	0	27	0	28	0	26	30	0	24	3.99999	3.99999	0	26	0	0	0	0
	2.25	0	0	0	3.99999	0	11	12	5.00001	25	0	0	0	22	0	18	24	0	0	0	5.00001	0	29	0	0.99999	6	0	0	0	0	0	5.00001	0	29	5.00001	25	6	24	30	0	30	25	22	0	25	0	0	0	3
	2.75	5.00001	0	8.00001	25	5.00001	25	21	12	12	8.00001	6.99999	0	23	5.00001	24	28	0	0	6	16	0	30	0	12	14	9	0	0	6.99999	0	2.00001	13	30	6	23	2.00001	30	27	0	28	13	28	0	30	0	15	0	21
	3.25	27	0	20	30	6.99999	28	27	22	23	21	6	6	27	27	30	30	0	0	21	23	0	30	13	9.99999	30	0	0	0	6.99999	13	9.99999	28	30	22	21	17	28	28	2.00001	28	19	30	0	30	0	18	0.99999	22
	3.75	30	6.99999	30	30	25	30	29	9	29	13	24	19	30	25	26	30	2.00001	0	30	19	0	30	20	17	30	0	6.99999	15	19	30	25	30	30	27	23	19	30	30	14	30	27	30	0	30	0	30	17	30
	4.25	30	27	30	30	27	28	30	30	30	30	30	26	27	29	30	30	5.00001	11	30	30	0	30	30	29	30	0	24	30	28	30	30	30	30	30	25	28	30	30	9.99999	29	30	30	13	30	0	30	28	23
	4.75	29	23	29	30	25	30	30	30	30	30	30	28	30	24	30	30	0	13	30	30	15	30	30	30	27	14	30	30	30	30	30	30	30	30	23	30	28	30	29	30	30	30	30	30	12	30	29	24
	5.25	30	0	24	30	26	30	30	29	30	30	30	30	30	14	30	30	0	12	30	30	28	30	30	30	23	30	30	30	30	30	30	30	30	30	30	30	29	30	29	30	30	30	30	30	11	30	30	26
	5.75	30	0	29	30	30	30	30	30	30	30	30	30	30	30	30	30	6.99999	27	30	30	29	30	30	30	28	30	30	30	30	30	30	30	30	30	30	30	26	30	29	30	30	30	30	30	25	30	30	30
	6.25	30	8.00001	28	30	30	28	30	30	30	29	30	30	30	30	29	30	30	30	30	30	30	30	30	30	30	30	30	30	30	30	30	30	30	30	23	30	27	30	29	30	30	30	30	30	12	30	30	30
	6.75	29	30	30	30	17	30	30	30	30	30	30	30	30	30	30	30	20	21	30	30	30	30	30	30	30	30	30	30	30	30	30	30	30	30	22	30	25	30	29	30	30	30	30	30	28	30	30	27
	7.25	30	30	30	30	30	30	30	30	30	30	30	30	30	30	30	30	26	0	30	30	30	30	30	30	30	30	30	30	30	30	30	30	30	30	29	30	29	30	30	30	30	30	30	30	30	30	30	21
	7.75	30	29	29	30	30	30	30	30	30	29	30	30	30	30	30	30	26	0	30	30	25	30	30	30	29	30	30	30	30	30	30	30	30	30	29	30	25	30	30	30	30	30	30	30	30	30	30	30
	8.25	30	30	23	30	30	30	30	30	22	26	30	30	30	30	29	30	29	14	30	30	20	30	23	30	30	30	30	30	30	30	30	30	30	30	30	30	28	28	30	24	30	30	30	30	30	30	30	29
	8.75	30	11	25	30	29	30	30	28	30	30	30	30	30	30	30	30	19	8.00001	30	30	29	30	29	30	30	27	30	30	30	30	30	30	30	30	30	30	25	30	30	29	30	30	30	30	30	30	30	25
	9.25	30	11	28	29	9.99999	13	30	26	30	29	19	28	30	30	25	30	3.99999	8.00001	25	30	11	30	30	30	25	29	30	30	30	30	26	30	30	30	29	30	28	27	30	28	30	30	30	30	30	30	30	28
	9.75	30	0	16	22	3	29	30	22	29	21	26	30	24	26	28	30	0	0	5.00001	30	8.00001	30	30	30	27	21	30	21	30	9	14	29	30	30	24	30	26	27	6	17	30	30	30	30	30	23	30	28
	10.25	24	0	0	0	0	29	27	13	25	0	6	8.00001	9.99999	21	27	15	0	8.00001	0	22	5.00001	18	28	30	13	0	29	3.99999	30	26	21	29	30	30	27	30	25	20	0	0	30	28	30	27	30	3.99999	30	13
	10.75	8.00001	0	0	0	0	15	9.99999	0	0	0	0	0	6	11	9.99999	20	0	0	0	0	0	13	19	15	6	0	30	0	30	16	19	28	24	28	28	27	30	24	0	0	29	13	30	21	26	0	30	23
	11.25	0	0	0	0	0	0	0	0	0	0	0	0	0	3.99999	0	0	0	6	0	0	0	0	5.00001	24	0	0	9	0	29	0	6	6.99999	6.99999	9.99999	28	18	30	30	0	0	29	0	30	13	28	0	24	19
	11.75	0	0	0	0	0	0	0	0	0	0	0	0	0	0	0	0	0	0	0	0	0	0	0	24	0	0	0	0	26	0	0	0	0	0	6	0	30	30	0	0	0.99999	0	30	0	3	0	8.00001	0
	12.25	0	0	0	0	0	0	13	12	0	0	0	9.99999	0	14	5.00001	15	17	0	0	0	5.00001	13	6	0.99999	15	0	0	0	0.99999	6	0	0	20	17	0.99999	17	30	13	11	24	25	20	0.99999	20	6.99999	11	0	21
	12.75	0	8.00001	0.99999	11	13	0	30	23	0	2.00001	3.99999	30	0	18	24	30	21	0	0	0	0.99999	30	24	0	21	17	0	6	0	22	15	0	30	30	27	30	30	27	30	29	30	30	21	30	3	25	0	30
	13.25	0	11	24	30	24	0	30	29	0	29	25	30	0	14	23	30	28	30	14	25	23	30	30	0	29	26	0	30	0	30	29	0	30	30	30	30	30	30	30	29	30	30	26	30	12	30	8.00001	27
	13.75	28	25	16	30	29	16	30	30	0	30	30	30	0	22	30	30	28	30	30	30	27	30	30	16	30	28	0	30	0	30	30	11	30	30	29	30	30	29	30	30	30	30	19	30	29	15	29	30
	14.25	30	18	16	30	30	29	30	28	0.99999	30	28	30	0	23	30	30	30	30	30	30	30	30	30	30	30	26	0	30	6	30	30	30	30	30	30	30	30	30	30	30	30	30	12	30	30	29	30	30
	14.75	30	19	17	30	30	30	30	29	30	30	26	30	6	28	30	30	22	30	30	20	30	30	30	30	30	30	0	30	17	30	30	30	30	30	29	30	30	23	30	30	30	30	30	30	30	9	30	28
	15.25	30	0	22	30	29	29	30	30	27	18	30	30	8.00001	29	30	30	16	30	30	21	22	30	30	30	28	14	6.99999	30	30	30	29	30	30	30	29	30	30	30	30	30	30	30	26	30	30	27	30	30
	15.75	30	0	23	30	26	30	30	29	30	24	20	29	30	30	30	30	6	25	30	15	30	30	30	30	30	23	0	29	29	30	26	30	30	30	30	30	30	29	30	30	30	30	30	30	30	24	30	26
	16.25	30	11	21	29	30	30	30	30	30	30	26	30	12	30	30	30	9	29	24	18	25	30	30	30	30	30	0	27	28	30	28	30	30	30	30	30	30	29	30	30	30	30	27	30	30	29	30	29
	16.75	30	30	0	30	30	30	30	30	30	20	22	30	0	30	29	30	30	28	29	30	30	30	30	30	30	30	5.00001	25	30	30	29	30	30	30	30	30	30	26	30	30	30	30	6.99999	30	30	24	30	30
	17.25	30	30	15	30	30	25	30	30	30	0	30	30	0	30	30	30	12	26	30	30	26	30	30	30	30	24	16	30	30	30	29	29	30	30	30	30	30	30	30	30	30	30	29	30	30	23	30	28
	17.75	30	30	25	30	15	29	30	30	30	23	27	30	25	30	30	30	11	29	28	30	30	30	30	30	30	25	29	26	30	30	0.99999	30	30	30	30	30	30	30	30	30	30	30	30	30	30	30	30	30
	18.25	30	24	19	30	0	30	30	30	30	30	30	26	16	29	30	30	26	30	30	30	21	30	30	30	30	29	25	27	30	30	21	30	30	30	30	30	30	22	30	30	30	30	24	30	30	28	30	28
	18.75	30	30	19	30	26	30	30	28	30	30	30	30	25	30	30	30	14	29	24	25	30	30	30	30	30	30	23	30	30	30	30	30	30	30	30	30	30	30	30	30	30	30	30	30	30	28	30	26
	19.25	30	30	22	30	30	30	30	30	29	17	30	30	25	30	30	30	17	30	29	30	15	30	30	30	30	9.99999	27	29	30	30	30	30	30	30	30	30	30	30	30	30	30	30	29	30	30	20	30	30
	19.75	30	29	22	30	5.00001	30	30	30	29	30	30	30	26	30	30	30	29	24	30	28	30	30	30	30	30	26	8.00001	0	29	30	30	30	30	30	24	30	30	30	30	30	30	30	30	30	30	30	30	30
	20.25	30	0	18	28	5.00001	29	30	30	22	11	30	30	24	30	30	30	12	29	30	19	30	30	30	30	30	30	29	0	30	30	30	30	30	30	30	29	30	30	30	30	30	30	30	30	30	29	30	30
	20.75	30	0	27	21	6	30	30	30	29	0	21	30	6.99999	30	30	30	24	16	6.99999	8.00001	5.00001	30	26	30	29	25	27	0	30	27	30	20	28	30	30	28	30	30	30	30	30	30	28	30	30	28	30	30
	21.25	26	0	6.99999	15	0	29	30	24	14	0	0	22	16	30	30	22	11	27	6.99999	19	0	30	15	30	30	8.00001	0	9.99999	30	29	30	0	18	30	30	28	30	28	30	30	30	30	30	30	30	24	30	29
	21.75	14	2.00001	12	3.99999	0	27	30	30	0	0	0	30	0	30	30	29	25	30	30	25	0	30	0	25	30	12	9.99999	30	30	6	17	0	28	30	12	30	30	28	30	30	30	30	30	30	30	12	30	30
	22.25	0	6	19	13	0	22	30	30	3	0	5.00001	5.00001	0	30	30	28	24	30	30	19	0	30	23	28	30	30	30	30	30	27	29	0	26	30	24	30	30	30	30	30	30	30	24	30	30	20	30	30
	22.75	0	0	0	20	11	14	30	25	5.00001	0	28	0	0	30	30	30	21	21	13	5.00001	0	26	30	19	30	29	9	22	19	13	15	0	29	30	30	30	30	30	30	30	30	30	29	30	30	19	30	26
	23.25	3.99999	3.99999	3.99999	3.99999	5.00001	3.99999	3.99999	12	3.99999	3.99999	5.00001	3.99999	3.99999	22	17	12	3.99999	9.99999	3.99999	3.99999	3.99999	12	12	8.00001	16	3.99999	3.99999	3.99999	5.00001	3.99999	14	3.99999	11	30	14	17	27	29	19	17	19	27	3.99999	24	8.00001	9	19	17
	23.75	30	3.99999	3.99999	9.99999	3.99999	3.99999	5.00001	3.99999	3.99999	3.99999	3.99999	3.99999	3.99999	3.99999	3.99999	16	3.99999	3.99999	3.99999	3.99999	3.99999	3.99999	3.99999	9.99999	20	3.99999	3.99999	3.99999	3.99999	3.99999	3.99999	3.99999	12	18	12	11	14	13	15	8.00001	3.99999	30	3.99999	13	9.99999	3.99999	20	3.99999
	24.25	0	0	0	0	0	0	0	0	0	0	0	0	0	0	0	0	0	0	0	0	17	0	0	0	0	0	0	0					0	27	6	0	19	11	0	8.00001	0	13	0	13	0	0	9.99999	0
	24.75	0	0	0	0	0	0	0	0	0	0	0	0	0	0	0	0	0	0	0	0	0	0	0	0	0	0	0	0					0	18	0	0	13	0	0	3	0	0	0	0	0	0	0	8.00001
	25.25	0	0	11	0	0	0	0	0	0	0	0	0	0	0	0	0	0	0	0	0	0	0	0	0	0	0	0	0					0	15	0	0	0	0	0	14	0	0	0	20	0	0	0	2.00001
	25.75	0	0	9.99999	6.99999	0	0	0	0	0	0	0	6	0	0	0	0	0	0	0	0	0	0	0	0	0	0	0	0					5.00001	24	5.00001	0	0	9.99999	0	21	0	0	0	19	0	0.99999	9	5.00001
	26.25	0	0	18	19	0	0	0	0	0	0	21	13	0	5.00001	0	2.00001	0	0	8.00001	0	0	0	0	0	0	0	0	0					9	26	0	9.99999	9	6.99999	0	29	0	12	3	28	0	25	0	0
	26.75	0	0	8.00001	26	0	3	0	0	0	0	27	29	0	5.00001	0	5.00001	0	2.00001	0	0	0	0	0	0	0	0	0	0					6	24	6	0	3	6.99999	5.00001	29	19	18	2.00001	30	0	30	14	12
	27.25	0	0	18	30	0	6.99999	0	0	0	0	24	26	0	0	0	0	5.00001	6.99999	0	0	0	0	0	0	0	0	0	20					19	30	0	0	0	9.99999	0	30	0	0	0	30	5.00001	30	23	0
	27.75	0	0	28	30	0	0	0	0	6.99999	0	12	17	0	0	0	6.99999	0	29	0	5.00001	0	0	0	16	0	17	0	28					29	30	0	9.99999	0	3.99999	0	30	6.99999	18	5.00001	30	13	30	27	0
	28.25	0	8.00001	30	30	0	0	17	9	11	0	28	30	11	27	0	0	0	23	0	12	0	6.99999	0	30	0	30	14	30					30	30	5.00001	22	0	18	0	30	24	22	11	30	22	30	30	3.99999
	28.75	8.00001	3.99999	30	30	3.99999	0	9	0	0.99999	0.99999	29	30	5.00001	30	3.99999	0	0	30	29	29	0	25	5.00001	30	0	24	28	30					30	30	9	28	8.00001	27	0	30	25	26	25	30	15	30	30	21
	29.25	15	3	30	30	28	5.00001	9	14	19	3.99999	30	30	30	30	24	15	0	28	0.99999	30	2.00001	30	6	30	20	30	29	30					30	18	0	25	9.99999	30	0	30	30	30	30	30	30	30	30	30
	29.75	30	11	30	30	29	0	30	30	30	0	30	30	30	30	30	24	0	24	29	27	30	30	8.00001	30	30	30	26	30					30	30	14	27	8.00001	30	3	30	30	30	30	30	30	30	30	28
	30.25	30	14	30	30	30	5.00001	30	30	30	15	30	30	30	30	30	30	11	27	25	27	27	30	20	30	30	30	29	30					30	30	26	30	5.00001	30	17	30	30	30	30	30	30	30	30	30
	30.75	30	23	30	30	25	26	30	30	30	26	21	30	18	30	30	30	24	6	27	30	29	30	27	30	30	30	29	30					30	30	24	30	29	30	5.00001	30	30	30	30	30	30	30	30	30
	31.25	30	28	30	30	29	24	30	30	30	18	30	30	24	30	30	30	9	25	30	30	30	30	25	30	30	30	18	30					30	30	30	30	29	30	0	30	30	30	30	30	30	30	30	30
	31.75	30	28	30	30	29	13	12	30	30	11	30	30	30	30	30	30	26	11	29	30	30	30	29	30	29	30	17	30					30	30	30	30	11	30	0	30	30	30	30	30	30	30	30	30
	32.25	30	17	29	30	30	12	17	17	30	0	23	30	30	30	26	30	16	6.99999	19	30	30	30	30	30	30	30	22	30					30	30	30	30	23	30	26	30	30	30	30	30	30	30	30	30
	32.75	30	20	30	30	13	28	0.99999	0	30	0	29	30	15	30	0	28	9.99999	8.00001	28	30	30	30	29	30	30	30	6	27					30	30	23	30	30	30	30	30	30	30	30	30	30	30	30	30
	33.25	30	0	28	25	0	3	15	0	19	12	19	30	0	30	0	27	6.99999	8.00001	6	30	30	25	30	23	30	28	16	30					30	30	26	30	15	30	30	30	30	30	30	30	30	30	30	30
	33.75	9	8.00001	0	18	0	17	0	15	0	30	16	15	0	30	0	30	0	6	12	30	26	29	30	0	30	6.99999	6.99999	30					30	30	21	30	6	30	30	30	28	30	30	30	30	30	30	30
	34.25	0	5.00001	15	6.99999	0	17	3	0	6.99999	13	0	12	0	30	0	22	6	0	0	29	20	24	30	0	24	2.00001	0	15					30	30	26	28	11	29	30	30	30	30	30	30	30	30	30	30
	34.75	0	0	6.99999	15	0	9	3	12	5.00001	15	5.00001	0	0	30	0	0	0	0	8.00001	30	14	0	26	0	11	0	5.00001	0					30	19	22	19	0	29	30	30	19	30	30	23	30	30	30	30
	35.25	0	0	12	3	0	5.00001	0	0	0	0	0	0	0	30	0	0	0	0	0	24	8.00001	0	30	0	0	0	0	0					30	0	3	0	0	16	30	30	2.00001	30	30	0	30	30	30	30
	35.75	0	0	0	0	0	5.00001	0	11	0	0	0	0	0	30	0	0	0	0	0	30	0	0	25	0	0	0	0	0					22	0	0	0	0	0	25	30	0	19	30	0	30	30	30	8.00001
	36.25	0	0	5.00001	0	0	0	0	0.99999	0	0	0	0	0	0.99999	0	0	0	0	0	2.00001	0	0	6.99999	0	0	0	0	0					0	0	0	0	0	3	0	24	9.99999	0	0.99999	0	2.00001	21	25	0
	36.75	0	0	3.99999	0	0	0	0	0	0	0	0	0	0	0	0	0	0	0	0	0	0	0	0	0	0	9	0	0					16	0	17	24	0	12	6.99999	30	26	19	0	11	0	30	30	0
	37.25	0	0	6.99999	6	0	0	0	0	0	0	0	0	0	0	0	0	0	0	0	0	0	0	9	0	0	5.00001	0	0					30	29	18	30	0	30	23	30	30	30	0	6	3	30	8.00001	0
	37.75	0	0	8.00001	9.99999	0	0	0	0	6	0	0	0	15	8.00001	0	0	0	0	0	0	13	0	0	5.00001	0	0	0	8.00001					30	28	19	30	0	30	30	30	30	30	0	5.00001	26	30	16	0
	38.25	0	0	18	5.00001	0	3	0	0	2.00001	0	0	0	2.00001	30	0	0	0	0	0	8.00001	11	0	14	0	0	0	0	12					30	30	27	30	0	30	30	30	28	30	8.00001	22	29	30	30	0
	38.75	0	0	25	6	0	13	12	0	19	0	12	14	0	30	0	0	0	0	15	29	5.00001	0	0	0	0	0	0	6.99999					26	28	22	30	0	30	30	30	30	30	16	30	30	30	30	0
	39.25	0	0	5.00001	5.00001	0	8.00001	0	0	22	18	3.99999	15	6.99999	30	0	11	0	0	0	29	5.00001	0	5.00001	0	0	0	0	12					20	27	30	28	0	30	30	30	30	30	23	24	30	30	30	0
	39.75	0	5.00001	0	0	5.00001	23	0	18	30	0	18	6	5.00001	30	0	9.99999	0	29	6	30	5.00001	0	6	0	0	0	0	19					0	30	23	30	0	30	30	30	30	28	28	26	30	30	30	5.00001
	40.25	0	0	6	0	0	30	0	12	30	11	6	12	0.99999	30	0	12	14	15	15	30	0	0	5.00001	0	0	0	12	3.99999					6	24	21	30	0	29	30	30	28	30	26	28	30	30	30	30
	40.75	0	5.00001	27	0	5.00001	30	0	23	30	24	17	18	3.99999	0	0	22	6	0	22	29	3.99999	0	9.99999	0	0	0	2.00001	5.00001					11	20	23	30	0	11	30	30	30	30	14	16	30	30	30	30
	41.25	0	0	8.00001	0	0	30	14	24	30	26	17	11	6.99999	0	0	29	5.00001	0	20	30	13	0	9	0	0	0	6.99999	6.99999					20	27	24	30	0	0	30	30	29	30	14	12	30	30	30	30
	41.75	8.00001	6	16	0	28	30	19	19	30	24	30	17	0	0	6	14	5.00001	0	30	30	5.00001	6	15	3.99999	0	0	14	12					20	28	19	28	0	0	30	30	30	30	23	0	30	30	30	30
	42.25	16	5.00001	26	0	30	30	0	22	30	0	6.99999	15	0	0	9.99999	14	3.99999	0	24	30	24	6.99999	14	0.99999	0	0	30	13					9	29	26	11	0	2.00001	30	30	30	30	5.00001	0	30	27	30	30
	42.75	0.99999	0	5.00001	0	28	30	5.00001	25	30	9.99999	9	18	0	6.99999	0	17	6.99999	0	15	30	22	0	6.99999	6.99999	0	0	30	17					9	28	30	29	0	3	15	26	25	28	20	0	30	29	30	29
	43.25	0	5.00001	26	5.00001	0	30	13	0	30	9.99999	0	17	0	0	12	9	13	0	0	28	26	0	19	0	0	0	30	21					0	14	26	30	0	0	30	24	27	30	30	0	30	24	30	30
	43.75	21	0	13	0	0	30	15	20	30	16	0	12	9	0	17	11	6	0	12	30	30	0	3.99999	0	0	0	30	21					0	23	30	30	0	5.00001	30	26	18	30	30	0	30	30	30	30
	44.25	9	0	21	0	0	30	17	0.99999	30	0	9.99999	21	0	0	23	0	0	0	6	30	29	5.00001	11	0	0	0	6.99999	27					0	27	21	30	0	5.00001	30	21	28	30	11	0	30	30	30	30
	44.75	5.00001	5.00001	26	0	0	30	18	6	30	11	0	26	6.99999	0	13	0	6	0	5.00001	30	30	0	15	0	0	0	0.99999	30					0	9	30	30	5.00001	25	30	16	17	23	20	0	30	23	30	30
	45.25	15	12	25	0	29	30	21	25	30	24	6.99999	17	5.00001	0	20	0	9	0	11	23	30	0	6.99999	0	0	0	25	30					0	24	27	17	29	26	29	9	15	27	9.99999	0	30	26	30	18
	45.75	30	0.99999	3	5.00001	30	30	20	6	30	16	11	30	6	0	25	0	0	0	17	25	30	0	3	6.99999	0	0	9	30					0	9.99999	27	21	30	30	0	6.99999	30	18	12	2.00001	30	8.00001	30	30
	46.25	9	25	0	6	22	30	30	0.99999	30	30	19	30	30	0	30	24	25	0	30	17	30	13	14	24	0	0	22	30					0	9	20	25	30	30	0	23	12	6.99999	0	14	30	6	30	30
	46.75	14	6	0	0	24	30	16	20	30	20	14	30	14	0	20	12	16	0	28	18	30	20	15	19	0	6.99999	25	30					0	9	30	28	30	30	3.99999	6.99999	0	11	8.00001	6.99999	30	0	30	6.99999
	47.25	0	0	5.00001	12	2.00001	30	0	0	30	20	11	30	0	0	0	0	6	0	0	29	30	0	17	0	0	0	0	30					0	0	24	12	30	30	9	0	9	0	0	5.00001	30	6	22	9
	47.75	0	0	9	5.00001	3	30	0	0	30	6.99999	5.00001	30	0	0	0	0	0	0	0	0	30	0	18	0	0	0	0	30					0	0	17	0	30	30	0	0	27	0	0	0	30	24	30	0
	i: Day sleep						j: Night sleep
	EEC>	EEC>upd3-i KK	EEC>	EEC>upd3-i KK			EEC>	EEC>upd3-i KK	EEC>	EEC>upd3-i KK
	518	648	410.5	540			435.5	653	357	227
	284.5	488	196	591			392	696	166.5	453
	543.5	601	316	306			462.5	622	409.5	552
	377.5	477	416	409			550	671	374.5	583
	399.5	651	356	229			459	702	332	185
	503.5	673	281.5	468			604.5	658	326.5	452
	475	351	314	261			615	676	234.5	508
	388.5	559	233.5	644			573.5	678	245.5	544
	398	581	310	424			434.5	678	335	569
	316.5	566	288.5	518			426.5	708	476	551
	364	463	286.5	466			499	551	422	300
	484	642	431.5	583			582	688	470	208
	570.5	372	330.5	475			418.5	609	108.5	632
	448	437	394.5	596			536.5	527	313.5	585
	496.5	472	376	563			645	617	380.5	673
	499.5	457	305	448			550	649	142.5	398
	263	693	208.5	571			475.5	684	179	284
	327.5	477	305.5	353			560	702	94.5	237
	523	672	278	202			594	693	166.5	194
	552.5	599	415.5	583			512.5	683	265.5	641
	417	495	266.5	314			481	646	376.5	345
	566.5	336	310.5	422			633	681	325.5	206
	554.5	700	328	383			570	672	425	574
	504	688	398.5	291			613	692	224.5	101
	503.5	594	377.5	299			636.5	606	257.5	268
	500.5	697	421.5	295			600.5	705	131.5	429
	468.5	415	277	593			416.5	645	469	680
	521		430.5	95			567		484	504
	549.5		280	318			584.5		651	396
	568			310			623			234
	537						573.5
							551
[truncated: 11 more columns]

## Sheet: Figure 4
	Figure 4
	a: Immuno stain		b: GFP/RFP quantification					c: Immuno stain			d: GFP quantification								e: Relative expression
			6x STAT dGFP/RFP								Normal food			1% H2O2					dome
			Z0	Z12	Z12 + 1%H2O2						voila TS>	voila TS>upd2-i SH	voila TS> upd3-i KK	voila TS>	voila TS>upd2-i	oila TS> upd3-i KK			voila TS>	voila TS>upd3-i KK
			0.550502	0.534302	0.876404						1.23528	0.636998	0.328872	1.31329	0.440562	0.468603			0.649791	1.4166
			0.479639	0.539451	1.39225						0.971389	0.527704	0.381266	1.56216	0.560633	0.222842			0.965962	2.33484
			0.607725	0.503325	0.559019						1.03075	0.494134	0.574634	1.15653	0.704362	0.691933			1.02152	1.16171
			0.677382	0.842325	0.574117						1.2888	0.568511	0.520503	2.05714	0.515288	0.405999			1.36272	1.54686
			0.566466	0.684605	2.4295						0.754728	0.548308	0.442553	1.35759	0.820965	0.365787			1.0205	4.35609
			0.482293	0.958166	0.81293						0.880746	0.59422	0.596175	1.57428	0.887862	0.405159
			0.359816	0.935698	0.591833						0.887503	0.497922	0.492187	1.99877	0.831587	0.369742
			0.292475	1.19995	0.790698						0.950812	0.566583	0.611583	2.22636	0.498558	0.398606
			0.308646	0.902574	1.55957
			0.355342	0.712563	0.991912
			0.328102	0.521718	0.508127
			0.540276	0.373772	1.17798
			0.399402	0.47152	1.13042
			0.390887	0.692854	1.1365
			0.47741	0.552296	2.04137
			1.0048	0.704007	0.654273
			0.280397	0.329249	0.268018
			0.440981	0.630006	1.18778
			0.839478	1.02606	1.78167
			0.602923	0.578144	1.41119
			0.478486	0.540396	0.834593
			0.466058	0.379506	1.84801
			0.338278	0.588313	1.20336
			0.46169	1.04158	0.859591
			0.202824	1.2731	1.77963
			0.399667	1.25247	1.03833
			0.725809	0.996979	0.889305
			1.46577	0.898972	0.646812
			0.618401	1.1698	0.923634
			0.491921	1.3516	1.53382
			0.522838	1.06299	2.5964
			0.375963	1.45496	1.23628
			0.436835	1.11144	1.41737
			0.259783	1.15568	0.692463
			0.581965	1.44155	1.92777
			0.968207	1.07952	0.979067
			0.21618	1.26666	0.538066
			0.51969	0.758878	1.75557
			1.47989	0.200181	0.505778
			0.269899	0.306434	0.388282
			0.819156	0.570535	2.01737
			0.662161	0.292819	1.59703
			0.570349	0.232221	1.63238
			0.66557	0.304221	1.78579
			0.581693	0.236044	1.54296
			0.693343	0.318672	1.49205
			0.656536	0.377327	2.34559
			0.870374	0.789131	0.953851
			0.540493	0.665659	1.5771
			0.194711	0.288972	1.64812
			0.442457	0.337267	1.77953
			1.40392	0.57218	1.77236
			0.601152	0.358503	1.56665
			0.340586	0.228747	2.05139
			0.55013	0.911668	1.24758
			0.849613	0.248751	0.953674
			1.12505	0.379659	1.36176
			0.825693	0.453173	1.2981
			0.976954	0.612163	1.69745
			0.504497	0.41976	1.40591
			0.711722	0.869531	1.54623
			1.05055	0.676974	1.79659
			0.104369	0.429187	1.82944
			0.740144	0.393176	1.12178
			0.500873	0.723107	1.09484
			0.439678	0.474512	2.0352
			0.406641	0.218857	1.50461
			0.263704	0.419811	1.07606
			0.357088	0.559732	0.713906
			0.508717	0.536394	1.52338
			0.532341	0.531495	1.41878
			0.299515	0.419814	1.04004
			0.387597	0.37715	0.861802
			0.390076	0.530227	0.522842
			0.529838	0.457255	0.965357
			0.580451	0.45492	1.47533
			0.363334	0.390293	1.32923
			0.369275	0.753043	0.841252
			0.536866	1.08863	1.12996
			0.604003	0.778177	1.06201
			0.456879	0.666422	2.34669
			0.661947	0.478424	1.08188
			0.473126	0.517673	0.851494
			0.66906	0.547316	1.19529
			0.57087	0.40838	0.504727
			0.565153	0.494492	0.462959
			0.231302	0.866777	0.48113
			0.669794	0.921086	0.287387
			0.164607	0.880542	0.49403
			0.29919	0.374312	0.577401
			0.528041	1.05501	0.557281
			0.385557	1.12791	1.11057
			0.665221	0.638006	0.567131
			0.422509	0.334317	0.817894
			0.481686	0.915181	1.68619
			0.513404	0.804721	1.53237
			0.899984	0.827595	1.27759
			0.540376	1.25297	1.21854
			0.457419	1.07988	1.354
			0.128688	1.72481	0.785224
			0.534943	0.73281	0.963852
			0.44094	0.555498	0.724248
			0.50916	1.07038	0.953625
			0.473304	0.241406	1.17881
			0.43477	1.177	1.08273
			0.36848	0.441183	1.44531
			0.680899	0.323406	1.55441
			0.628666	0.317182	0.933546
			0.27531		0.974857
			0.909793		0.958827
			0.448279		1.51111
			0.574253		1.32818
			0.32835		1.13028
			0.395919		1.09379
			0.36945		0.706412
			0.436099		0.890416
			0.537094		1.0147
			0.569175		0.926146
			0.645704		1.39319
			0.313487		0.638035
			0.786737		1.50627
			0.413735		0.61047
			0.898217		1.15505
			1.36488		0.895327
			0.780129		1.73416
			1.35367		0.9794
			0.932606		0.810654
			0.512598		1.2239
			1.14244		2.18228
			0.488408		1.535
			0.681068		1.47105
			0.552631		1.69667
			0.750202		1.48403
			0.358281		0.97584
			0.887846		1.12756
			1.14595		1.5706
			0.630697		0.572414
			0.593592		1.08675
			0.426802		1.5343
			0.781766		1.86779
			0.865772		1.57997
			0.865563		1.1872
			1.12426		1.62661
			0.527853		0.914479
			0.778431		1.49121
			0.456794		1.12089
			0.783225		0.99779
			0.557882		1.4083
			0.382062		0.568129
			0.597529		1.16576
			1.29041		1.29327
			1.03883		1.11511
			0.22948		0.958021
			0.701965		0.83143
			0.50964		0.805069
			0.254983		0.927265
			0.757886		0.351218
			1.27874		0.396313
			1.16739		1.08857
			0.399076		1.25517
			0.436691		0.759673
			0.398975		1.02233
			0.750535		0.755509
			0.542171		0.768943
			0.833845		1.172
			0.442371		0.935037
			0.816961		0.474153
			0.587509		0.541597
			0.533395		0.474755
			0.54707		1.869
			0.589774		0.561559
			0.437249		1.01137
			1.32439		1.35961
			0.474925		0.98323
			0.786228		1.14627
			0.352249		0.800311
			1.14442		1.3017
			0.941202		0.667678
			0.835028		0.642369
			0.846192		0.477227
			0.433744		0.238489
			0.578883		0.784712
			0.619652		0.796346
			0.441016		0.984708
			0.451169		0.580639
			0.644535		0.659185
			0.326116		0.848007
			0.316997		0.702259
			0.539237		0.436801
			0.300133		0.211027
			0.222304		0.402822
			0.325305		0.275973
			0.293312		0.44548
			0.503817		1.10914
			0.412744		0.337133
			0.412926		0.415025
			0.451644		0.446967
			0.435776		0.826855
			0.436943		0.888399
			0.412744		0.543655
			0.40604		0.981687
			1.16294		0.702569
			0.392201		0.714094
			0.367032		0.693762
			0.418526		0.939677
			0.26912		0.758539
			0.266506		0.702212
			0.400752		1.04243
			0.080367		0.451536
			0.184591		0.990496
			0.163228		1.26563
			0.196112		1.66501
			0.254553		0.871068
			1.16793		0.856067
			1.32203		0.767066
			0.648818		1.03464
			0.591544		0.699352
			0.58659		1.38809
			0.291662		1.31353
			0.323955		0.784149
			0.390827		0.665721
			0.354955		1.06752
			0.394051		0.956132
			0.861235		0.636799
			0.24877		1.2182
			0.473168		1.52408
			0.356424		1.55189
			0.240219		0.96384
			0.364273		1.16156
			0.487948		1.57035
			0.24989		1.10849
			0.374218		0.888013
			0.338562		0.589366
			0.298311		1.04987
			0.290575		1.71393
			0.241313		1.22002
			0.160867		0.622714
			0.856448		0.834819
			1.2071		0.66198
			1.09773		1.47041
			0.862674		0.340592
			0.625257		0.467795
			0.477182		0.412525
			0.461916		0.616945
			0.463905		1.27394
			0.744369		1.15549
			0.588938		0.988785
			0.317922		1.46925
			0.823178		1.11762
			0.747347		0.902908
			0.681544		1.66405
			0.616795		0.82538
			0.703272		0.584608
			0.710625		0.599039
			0.428034		1.02014
			0.988763		1.16602
			0.606547		0.955842
			1.04715		0.893953
			0.56909		0.368162
			0.518782		0.62967
			0.536773		0.580503
			0.54656		0.88263
			0.379268		0.726043
			0.46164		0.700668
			0.442856		1.4995
			0.678463		0.60342
			0.41916		0.738576
			0.317946		1.15381
			0.385057		0.736498
			0.448585		1.92429
			0.709678		1.57543
			1.02942		1.81177
			0.852809		1.16254
			0.723808		1.99198
			0.614182		0.895202
			0.465022		0.905365
			0.838638		0.395718
			0.991293		0.469525
			1.32148		0.830902
			0.5431		1.68937
			0.453859		1.95703
			0.464059		1.39222
			0.363323		0.865016
			1.33874		0.97898
			1.06666		0.649977
			0.844665		0.860736
			0.745993		0.561435
			1.31098		1.28774
			0.778849		0.815113
			0.756666		0.483614
			1.38799		0.794394
			1.12822		0.736098
			0.90359		0.49984
			1.14765		0.536739
			1.07207		0.785197
			1.38258		1.44378
			0.577771		1.57715
			1.13814		1.40481
			0.555624		1.1829
			1.40407		1.42172
			1.37686		1.80245
			0.751885		1.39992
			1.12765		0.871513
					1.17677
					0.544501
					0.454278
					1.15321
					1.50044
					1.60734
					1.34369
					0.840321
					1.11401
					0.957727
					0.704163
					0.354748
					1.08965
					1.31309
					1.40493
					0.685552
					0.934163
					1.21526
					1.71068
					1.13451
					0.971849
					0.96287
					1.36607
					1.02759
					1.00316
					0.861005
					0.543425
					1.4973
					1.44929
					1.46166
					1.21353
					1.08923
					1.09746
					0.973688
					1.06146
					1.52182
					1.20902
					1.14826
					0.877982
					0.5411
					1.13
					0.990655
					1.36682
					0.373218
					0.49998
					0.986749
					0.856989
					1.05217
					0.912531
					0.945007
					1.11522
					1.21757
					1.46647
					0.715145
					1.17805
					1.00408
					0.574596
					1.10752
					0.7232
					1.11106
					1.30242
					0.469567
					1.28605
					0.83755
					1.18533
					1.16115
					0.887892
					0.620337
					0.872857
					0.73033
					0.403222
					0.411511
					0.428792
					0.534967
					0.493506
					0.725246
					0.517828
					0.576984
					0.531039
					0.887683
					0.879281
					0.778185
					0.552449
					0.706074
					0.276392
					0.509889
					0.377963
					0.46717
					0.259777
					0.301648
					0.327832
					0.63646
					1.37932
					0.412571
					0.493571
					0.495931
					0.579077
					0.582579
					0.844629
					0.617207
					1.23867
					1.23891
					0.936757
					0.275753
					1.01531
					0.408911
					0.592662
					0.598766
					0.984535
					0.706581
					0.349806
					0.582948
					0.399743
					0.664333
					0.620322
					0.633024
					0.909282
					0.555121
					0.684493
					0.654896
					0.650823
					0.747735
					0.58032
					1.17965
					0.76436
					0.784837
					0.786701
					0.667138
					0.940373
					0.970302
					0.65928
					0.79295
					1.04872
					0.816738
					0.800966
					0.81149
					0.657738
					0.769971
					0.889115
					0.561039
					0.980376
					1.55426
					1.34993
					1.14395
					1.47787
					0.620482
					1.20073
					1.51937
					0.335119
					0.396454
					0.854621
					0.909345
					0.510997
					0.274341
					0.528623
					0.942626
					1.06336
					0.366387

## Sheet: Figure 4 - figure supplement 1
	Figure 4, supplement 1
	a: Relative upd2 expression				b: Relative upd3 expression
	voila>	voila>upd2i			voila>	voila>upd3i
	1.08053	0.923358			0.548319	1.01515
	1.82777	1.05485			1.35824	0.876882
	1.34133	0.773776			1.28265	1.32962
	0.74578	0.812036			1.28539	1.1848
	0.856431	1.58426			0.896169	1.83803
		1.91643			0.629229	1.54922

## Sheet: Figure 5
	Figure 5
	a: Day sleep														b: Day sleep						c: Day sleep											d: Survival
	repo>	Day 1 - normal food		Day2,3 - on 1% H2O2											repoTS>						repo>	Day 1 normal food		Day 2 on 1% H2O2		Day 3 normal food / recovery
	Day1	Day2	Day3	Day1	Day2	Day3	Day1	Day2	Day3	Day1	Day2	Day3			Normal food		1 % H2O2				Day 1	Day 2	Day 3	Day 1	Day 2	Day 3	Day 1	Day 2	Day 3
	w1118	w1118	w1118	dome-i KK	dome-i KK	dome-i KK	dome-i TRiP	dome-i TRiP	dome-i TRiP	dome-i GD	dome-i GD	dome-i GD			w1118	dome-i KK	w1118	dome-i KK			w1118	w1118	w1118	dome-i KK	dome-i KK	dome-i KK	dome-i TRiP	dome-i TRiP	dome-i TRiP			w1118	dome-i KK	dome-i GD	dome-i TRiP
	397	449	462	460	454	397	542	430	469	463	546	592			314	600	511	459			224	434	617	535	219	584	657	554	616			112.6	99.9833	96.2167	106.983
	116	571	611	615	495	416	556	538	594	388	538	433			372	665	602	452			414	454	555	642	266	499	602	564	551			105.6	54.85	80.1167	116.833
	409	654	601	580	514	460	614	544	460	486	457	504			422	579	444	482			172	388	453	649	419	644	502	382	533			90.2333	94.4	96.2167	64.3333
	328	549	489	568	546	354	547	547	524	425	511	503			471	502	400	385			261	267	493	607	607	611	570	691	657			102.933	103.15	97.5	96.2167
	412	533	454	472	287	221	600	577	646	382	404	337			272	464	594	464			164	337	595	446	507	631	595	460	581			89.7167	86	96.2167	96.2167
	489	576	607	608	370	319	566	535	550	393	483	448			432	645	339	518			555	512	584	614	143	561	599	534	632			119.75	56.3	96.2167	96.2167
	275	445	539	616	537	422	600	118	276	412	444	517			327	519	537	466			35	280	495	575	340	580	545	528	593			99.6833	102.033	96.2167	96.2167
	162	515	496	643	381	174	656	549	638	414	440	492			586	486	477	524			6		467	621	374	608	313	513	614			73.25	54.9333	96.2167	119.933
	481	635	596	541	371	336	574	562	557	462	512	465			244	473	479	481			240	341	636	256	257	502	607	418	618			107.367	78.6	106.683	112.717
	412	574	568	568	358	173	551	539	535	422	410	401			145	572	550	556			459	207	532	600	430	594	494	613	614			81.2333	67.15	70.6667	81.3333
	350	533	505	469	373	341	499	499	469	339	386	430			657	472	475	446			184	300	477	580	509	672	671	519	496			117.7	68.8167	75.6833	77.95
	428	521	453	557	345	270	674	645	598	376	417	439			557	419	430	376			303	293	622	386	240	551	660	597	663			79.8	64.1	72.55	79.3667
	237	459	405	626	503	475	586	556	571	428	397	388			647	499	502	431			294	341	646	619	455	554	674	556	646			59.0167	83.2	96.2167	83.9833
	61	638	650	398	581	331	614	618	596	542	324	290			395	484	381	476			364	576	600	672	348	486	608	530	573			81.1667	76.7	64.8833	76.2833
	293	637	659	472	184	32	402	301	394	487	555	616			375	573	612	443			544	452	655	610	558	649	458	509	546			104.25	50.75	100.7	64.4333
	337	576	582	554	406	399	571	527	522	378	528	442			457	500	450	527			417	314	519	514	382	608	647	501	550			85.4667	74.3167	96.2167	108.3
	317	636	641	361	330	130	675	589	571	396	489	446			326	444	353	526			84	347	568	486	331	578	570	538	607			92.0333	75.4167	88.75	50.6
	14	563	522	676	424	367	619	603	590	386	398	497			297	643	560	330			279	227	451	607	438	657	545	456	629			86.9	100.7	83.0333	92.25
	410	470	394	676	633	580	562	552	471	570	435	585			397	686	394	354			104	386	501	683	618	660	303	564	531			93.9	81.3667	67.9167	81.55
	115	518	549	393	492	404	552	531	527	624	614	605			225	473	422	492			463	555	607	683	589	691	682	396	575			112.033	71.05	110.383	91.75
	335	621	598	659	460	372	577	524	526	417	443	457			312	477	511	486			120	249	493	653	579	673	629	345	596			86.7	103.15	105.117	87.5167
	281	605	496	601	541	439	641	473	605	487	423	423			117	389	434	487			384	486	491	699	413	697	542	501	601			98.5	67.5	80.75	108.317
	505	495	503	568	655	357	630	624	629	528	388	432			213	520	432	420			294	362	522	651	436	571	467	511	442			96.9667	119.867	96.2167	96.2167
	449	546	552	627	383	515	585	607	526	376	418	438			245	475	602	446			152	342	393	650	482	511	618	504	643			74.4167	69.05	96.2167	109.967
	360	551	535	609	499	89	518	628	578	333	360	322			80	521	486	505						700	467	679	605	647	560			70.6167	87.1333	101.7	100.317
	505	562	611		443	322	578	597	565	543	496	435			231	517	466	357						485	478	556	663	422	633			96.25	56.1	69.0667	99.6667
	223	437	369		417	298	567	568	576	177	221	230			95	678	632	445						702	415	597	679	391	589			62.5667	85.8333	60.1	118.567
	368	508	516		641	309	578	427	612	595	619	549			274	642	501	421						666	543	640		524	614			97.8167	112.133	110.25	83.6667
	322	446	467		228	423	447	416	465	461	470	475			548	461	487	525						587	566	632						98.5167	81.8	114.2	82
	372	541	455		393		553	507	505	489	390	383			634		622	513						704	333	577						89.4667	75.15	86.4667	96.2167
	285	447	242		446		468	420	375	435	377	404			407		404	576						616	522	666						46.55	87.6	96.2167	96.2167
	236														464		387	414								571
	e: Sleep pattern
	Bin (hours)	EEC>																												EEC>upd3-i KK
	0.25	0	0	0	0	0	0	5	27	0	3	0	0	0	0	0	11	0	0	7	0	0	0	5	0	0	2	0	0	30	6	5	24	5	0	0	30	6	0	21	0	0	5	0	18	6	21	14	0
	0.75	0	7	0	0	0	1	4	25	0	8	0	0	0	5	0	0	0	0	0	0	0	0	0	10	0	12	0	0	30	0	12	24	6	5	0	30	0	0	5	0	0	0	5	12	3	27	23	0
	1.25	0	8	0	0	0	4	8	30	0	9	0	0	0	0	0	12	0	5	0	0	0	0	0	3	5	9	0	0	28	7	0	19	9	0	5	30	2	9	16	0	0	0	0	17	4	28	23	0
	1.75	0	0	0	0	5	6	8	26	0	24	0	7	0	0	5	11	0	0	0	0	0	2	0	16	8	12	0	6	23	0	12	26	9	6	12	30	26	20	12	5	0	0	9	27	22	30	18	0
	2.25	11	9	7	8	0	10	23	28	0	24	0	11	0	0	5	16	8	0	0	0	0	5	3	16	10	6	0	10	28	5	12	30	0	4	8	30	22	12	12	0	0	1	7	19	17	29	13	0
	2.75	5	9	19	6	0	5	21	28	5	27	0	11	0	19	26	19	4	0	0	5	0	8	14	20	19	13	1	0	23	5	20	26	12	20	0	30	13	11	15	3	8	28	16	29	19	29	18	5
	3.25	0	18	15	17	0	18	16	28	14	25	5	7	0	0	28	27	1	5	7	9	0	26	5	26	24	16	17	7	27	20	16	26	22	6	6	30	7	12	13	20	11	18	8	26	23	30	18	6
	3.75	0	20	17	6	0	13	25	27	8	28	0	21	0	20	29	24	6	0	6	8	0	28	10	22	21	19	13	6	29	20	17	30	29	22	22	30	16	21	21	30	6	26	5	23	26	30	14	11
	4.25	6	9	24	11	0	19	26	29	17	30	0	23	6	24	30	28	0	5	5	7	0	29	13	30	24	22	25	11	25	26	24	25	30	30	27	30	29	15	29	28	25	27	27	28	25	30	25	13
	4.75	3	25	28	20	0	28	30	27	21	20	13	20	6	27	29	30	12	0	0	9	5	29	23	24	25	27	30	23	23	30	28	30	30	25	11	30	27	29	30	30	23	30	30	27	21	30	18	25
	5.25	16	30	28	13	10	27	26	24	16	30	19	25	0	30	30	30	26	13	20	15	17	26	23	25	25	28	25	28	30	30	23	25	30	28	25	30	23	27	30	30	30	30	30	30	30	30	21	29
	5.75	19	30	30	24	7	25	30	30	23	26	14	30	13	30	30	30	23	23	17	24	25	27	29	28	29	30	18	28	29	30	27	30	30	30	30	30	27	30	30	30	30	30	30	30	30	30	21	30
	6.25	19	29	30	28	3	30	30	28	21	29	25	30	0	23	26	30	29	30	21	25	30	30	30	30	28	25	29	21	30	30	30	30	30	30	29	30	29	30	24	30	30	28	30	30	30	30	29	30
	6.75	22	30	28	29	7	30	29	28	29	30	20	25	27	29	30	30	24	30	26	28	30	29	25	28	28	29	27	18	30	30	30	30	30	28	27	30	30	30	30	30	30	30	30	27	27	30	30	30
	7.25	17	30	27	30	7	25	30	29	23	30	6	27	30	26	30	30	26	30	18	30	30	30	26	30	21	29	28	25	30	30	30	22	30	30	30	30	30	30	30	30	30	30	30	29	26	30	30	30
	7.75	11	27	27	30	11	30	28	28	22	30	5	22	26	24	30	29	28	30	25	29	30	30	28	28	26	30	30	21	30	30	30	30	30	30	27	30	30	30	30	30	30	30	30	28	29	30	30	30
	8.25	14	30	29	28	11	29	30	26	25	27	6	23	21	25	30	30	26	30	15	29	23	29	29	28	15	30	18	24	30	30	30	30	30	30	30	30	30	30	30	30	30	30	30	30	29	30	30	30
	8.75	12	24	20	29	0	19	23	30	24	20	16	17	16	29	29	28	24	30	16	29	30	29	30	28	26	30	13	17	30	30	30	30	30	30	30	30	30	30	30	30	30	30	30	29	30	30	29	30
	9.25	10	30	17	19	0	25	28	27	12	30	15	11	20	23	29	27	21	30	7	30	23	29	24	30	13	25	10	10	30	30	27	30	25	30	30	30	30	30	30	30	30	30	30	28	30	30	30	30
	9.75	0	27	0	8	0	29	21	28	15	2	6	9	0	30	24	30	21	25	9	26	8	29	27	22	7	27	1	26	30	30	30	30	29	30	30	30	30	30	30	30	30	30	28	30	30	30	29	30
	10.25	0	8	8	6	0	28	30	29	10	0	17	5	0	10	25	22	20	29	4	23	28	25	26	24	0	24	0	6	30	30	21	29	26	30	28	30	29	30	30	22	30	30	30	26	30	30	28	27
	10.75	5	0	3	8	0	9	19	27	5	0	0	5	5	0	0	0	17	0	9	6	0	21	14	9	0	25	5	5	25	30	27	29	18	30	29	30	6	30	29	27	30	30	29	29	20	30	30	14
	11.25	0	0	0	5	0	0	8	25	0	0	15	0	0	0	5	7	0	0	0	0	0	5	6	14	0	23	0	0	7	16	25	30	13	22	23	30	8	27	26	2	13	29	29	25	2	30	6	5
	11.75	0	5	0	0	0	0	7	24	0	0	6	0	1	0	0	0	0	0	0	0	0	0	4	8	0	18	0	0	5	0	6	20	0	0	11	30	17	6	0	0	2	14	10	28	20	25	0	0
	12.25	5	11	13	14	0	0	11	30	6	19	13	11	13	16	28	28	17	28	0	23	13	26	28	15	0	9	0	5	26	4	26	27	22	23	21	30	30	22	27	20	30	0	21	30	30	30	27	13
	12.75	9	30	29	15	0	11	8	23	18	22	21	12	18	24	30	30	30	23	1	30	21	26	26	26	20	16	0	11	30	29	30	28	19	30	25	30	30	30	30	10	23	19	21	30	29	30	26	18
	13.25	22	26	30	29	27	30	30	24	29	30	29	15	28	29	30	30	30	26	30	30	30	24	25	30	21	28	0	30	30	30	29	29	30	30	25	30	28	30	30	18	29	28	28	30	29	30	30	23
	13.75	22	22	30	22	17	30	26	28	29	30	30	26	27	30	30	30	30	29	30	30	25	30	26	29	30	19	0	30	30	30	29	28	30	30	30	30	27	30	30	25	30	29	24	30	24	30	27	23
	14.25	25	30	30	30	7	20	23	29	30	24	22	18	22	30	26	30	17	21	29	30	30	30	27	28	25	30	27	29	30	30	30	30	30	30	29	30	30	30	28	27	30	25	24	30	30	30	30	30
	14.75	30	25	30	28	0	29	30	29	22	30	30	30	19	30	30	30	28	27	29	30	16	30	29	30	27	26	28	29	30	30	30	28	25	30	25	30	29	30	29	30	30	29	28	30	30	30	27	30
	15.25	30	30	30	30	6	30	29	29	30	30	30	20	21	29	30	30	30	30	29	30	27	29	30	30	29	29	22	30	30	30	30	28	29	30	30	30	30	30	30	30	26	30	30	30	30	30	30	28
	15.75	30	26	28	27	0	30	28	22	26	20	30	27	28	27	30	30	29	25	29	28	26	15	30	29	19	30	17	26	30	30	30	30	29	30	30	30	29	30	28	30	30	29	30	30	26	30	27	30
	16.25	30	30	30	30	14	28	23	30	30	30	29	20	22	27	30	29	29	27	30	30	25	26	29	28	28	30	25	24	30	30	30	29	29	30	30	30	30	30	30	30	30	16	25	30	29	30	27	30
	16.75	30	30	30	27	3	26	30	29	28	29	29	26	30	27	30	30	29	30	29	30	29	23	30	19	30	23	27	30	30	30	30	28	25	30	30	30	30	30	30	29	28	30	30	30	30	30	30	28
	17.25	29	30	30	27	21	30	30	30	30	17	29	29	24	29	30	23	29	30	30	24	29	14	30	28	29	29	22	21	30	30	30	30	21	30	30	30	29	30	30	30	27	24	24	30	30	30	26	30
	17.75	30	30	30	19	15	30	28	26	30	30	30	30	26	23	30	30	26	27	30	30	27	30	30	30	30	29	30	29	30	30	30	30	19	28	30	30	30	30	30	30	23	26	25	30	30	30	30	30
	18.25	30	30	30	29	30	30	22	30	30	30	30	30	30	30	30	30	30	25	30	30	28	30	30	30	25	30	30	30	30	30	30	30	14	30	29	30	30	30	30	30	30	28	30	30	29	30	25	30
	18.75	30	30	30	30	30	30	30	29	30	20	30	30	30	27	30	30	29	30	30	30	30	29	30	27	30	30	20	30	30	30	30	30	10	30	28	30	30	30	30	29	30	30	22	30	30	30	30	30
	19.25	30	30	30	30	30	29	30	29	30	30	30	30	30	30	30	30	30	30	30	30	23	30	30	29	20	30	30	30	30	30	30	30	29	30	30	30	29	30	29	30	23	28	29	30	29	30	30	30
	19.75	30	30	30	30	30	29	30	23	30	30	30	30	28	23	30	30	28	29	30	30	30	30	30	27	30	30	22	30	30	30	30	30	29	30	29	30	26	30	30	30	29	23	30	30	27	30	28	30
	20.25	30	30	30	30	30	28	29	28	30	30	30	30	28	30	30	30	26	25	30	30	30	30	30	30	30	30	30	29	30	30	30	30	11	30	29	30	30	30	30	28	18	30	23	30	30	30	30	30
	20.75	30	27	30	23	30	30	30	30	30	30	30	30	30	30	30	30	27	29	29	30	30	30	28	28	25	30	30	30	30	30	30	30	30	30	25	30	30	30	30	30	14	30	30	30	29	29	30	30
	21.25	30	30	30	30	30	30	28	28	30	22	30	30	30	30	29	30	22	30	30	30	30	30	30	25	30	30	30	30	30	30	30	30	27	30	28	30	30	30	30	30	23	25	30	30	30	30	30	30
	21.75	30	29	30	30	30	30	29	30	30	30	30	30	30	29	30	26	30	30	30	30	30	30	30	30	30	30	30	30	30	30	30	30	30	29	30	30	29	26	30	30	9	30	25	30	30	30	30	29
	22.25	30	30	30	30	29	30	30	29	30	30	30	30	30	30	30	30	24	29	30	30	30	30	30	30	30	30	30	30	30	27	30	30	30	30	24	30	30	30	30	30	10	30	30	30	30	30	30	30
	22.75	30	30	30	30	17	30	30	30	30	30	30	30	30	30	29	30	30	30	29	30	30	29	30	30	30	30	30	30	30	30	30	30	30	30	30	30	28	30	30	30	9	30	29	30	30	30	29	30
	23.25	30	30	30	30	23	20	24	29	29	30	30	30	30	30	30	30	23	30	30	30	30	30	30	27	29	30	30	30	30	30	28	30	28	30	23	30	30	18	30	30	15	28	26	30	29	30	29	30
	23.75	24	23	23	23	24	23	15	29	29	15	21	29	24	23	23	24	23	30	24	23	13	16	29	18	23	25	17	24	27	23	24	30	23	27	25	30	22	12	24	24	22	23	17	30	26	30	24	18
	24.25	29	17	27	29	2.00001	30	28	12	27	29	29	16	19	6	20														24	25	30	21	25	6.99999	9	6	29	26	27	26	26	12	21	26
	24.75	26	27	21	23	21	28	27	17	17	26	30	19	29	27	29														6.99999	19	28	28	25	14	17	23	26	19	30	23	12	17	6	28
	25.25	17	19	27	23	20	22	26	28	25	3.99999	27	8.00001	22	21	25														12	5.00001	30	24	26	3.99999	23	17	9	15	24	9.99999	8.00001	6.99999	25	22
	25.75	26	18	20	23	15	23	26	19	22	3.99999	24	18	16	26	18														0	0	30	19	25	9	13	21	12	23	14	12	11	0	27	29
	26.25	26	19	23	26	16	24	21	22	25	18	12	9.99999	9	28	30														0	12	21	21	26	13	12	17	3.99999	14	22	18	6.99999	0	9.99999	25
	26.75	29	17	27	29	18	24	27	25	29	19	27	6	17	27	29														0	0.99999	26	25	24	20	5.00001	6	3.99999	18	19	9	8.00001	5.00001	8.00001	22
	27.25	28	25	15	24	6.99999	21	24	16	22	12	28	14	28	11	15														0	5.00001	27	15	25	14	15	14	0	17	16	9	6.99999	12	0	26
	27.75	22	9.99999	26	25	13	26	29	23	16	13	19	17	29	30	22														3.99999	8.00001	28	17	29	16	9	6.99999	0	11	11	14	3.99999	0	18	23
	28.25	20	13	15	25	14	29	25	30	2.00001	27	29	13	30	27	30														30	8.00001	27	8.00001	19	9	9.99999	13	0	23	8.00001	6.99999	27	9.99999	9.99999	20
	28.75	20	9.99999	19	24	19	9.99999	25	11	3	14	30	15	30	30	30														28	13	30	17	20	5.00001	13	16	0	29	8.00001	12	6.99999	6	15	23
	29.25	29	0.99999	25	22	14	28	30	26	6.99999	17	26	20	30	23	17														19	13	26	0	14	12	18	5.00001	0	20	22	9	9	8.00001	5.00001	13
	29.75	24	15	24	30	29	9.99999	21	25	20	14	22	9.99999	25	24	30														5.00001	12	24	0	15	9	16	6	0	13	3.99999	12	12	13	23	17
	30.25	29	3.99999	24	24	30	26	28	18	19	29	30	12	26	30	24														23	28	21	11	22	5.00001	9.99999	12	0	15	15	11	30	0	9.99999	12
	30.75	15	8.00001	22	27	0	23	30	27	25	29	28	20	24	29	30														29	30	26	27	11	0	9.99999	17	18	17	12	0	28	16	9	15
	31.25	15	30	29	14	30	27	24	20	24	30	26	17	30	30	30														26	22	20	17	8.00001	6.99999	18	18	0	15	6	0	26	6	13	26
	31.75	22	20	11	30	27	26	29	21	30	17	25	12	27	30	28														0.99999	30	13	15	13	21	5.00001	19	0	11	6.99999	0	28	2.00001	26	5.00001
	32.25	30	26	25	29	29	25	21	30	29	29	29	16	29	30	24														30	25	21	6.99999	6.99999	14	23	20	6	20	15	0	30	14	20	19
	32.75	30	29	28	19	29	17	30	30	30	28	25	15	30	30	30														30	16	22	8.00001	8.00001	23	26	24	0	9.99999	18	0	27	0	5.00001	25
	33.25	26	28	29	30	28	19	26	20	30	28	27	2.00001	9	30	29														30	0	25	0	6.99999	6	30	0.99999	0	19	0	0.99999	30	28	0	30
	33.75	27	26	15	28	24	17	24	25	25	30	20	19	16	11	20														30	0	26	14	14	21	22	20	0	21	8.00001	8.00001	22	3.99999	11	20
	34.25	16	17	23	17	3.99999	23	27	26	21	0	15	25	5.00001	11	17														24	8.00001	20	6	13	17	28	24	5.00001	18	11	0	9	14	21	24
	34.75	26	0	18	26	20	22	17	19	18	9.99999	30	15	12	21	5.00001														15	12	15	29	16	20	24	6	15	20	0	0	23	21	18	12
	35.25	13	11	23	23	17	15	27	25	17	6.99999	29	24	8.00001	21	22														17	9.99999	21	30	13	17	21	6	3.99999	16	0	14	0	29	19	22
	35.75	21	6	23	28	9.99999	18	27	30	14	0.99999	17	26	14	29	26														20	5.00001	20	24	21	11	5.00001	5.00001	0.99999	6.99999	0	0	0	22	3.99999	20
	36.25	8.00001	16	19	0	0	14	25	12	20	0	28	22	15	21	19														0	0	8.00001	6.99999	12	6.99999	6	5.00001	0	6	0	0	0	2.00001	11	9
	36.75	9	18	21	6	11	21	29	23	26	9	30	30	29	25	27														26	0	27	11	26	22	5.00001	0	0	6	12	0	22	11	16	30
	37.25	20	30	23	19	20	25	28	27	27	24	30	30	29	30	18														27	0	18	15	17	16	6.99999	6	11	0	9	5.00001	25	20	17	17
	37.75	28	30	22	15	23	25	26	22	26	27	29	23	22	24	27														14	0	22	25	21	30	26	5.00001	0	9.99999	16	18	30	6.99999	8.00001	18
	38.25	28	28	9	27	18	29	27	27	0	29	27	30	25	19	19														12	27	12	30	3.99999	30	30	24	6	12	16	30	30	16	5.00001	18
	38.75	30	25	24	21	30	13	19	23	27	22	28	30	6	21	30														21	30	17	30	9.99999	30	24	5.00001	2.00001	3	5.00001	30	30	22	0	23
	39.25	20	30	15	23	24	19	21	30	28	16	30	30	9	22	24														30	30	22	30	3	30	30	9	0	29	8.00001	30	30	12	13	11
	39.75	18	16	18	8.00001	30	30	16	27	24	30	30	30	12	0	19														24	30	14	30	12	30	24	6	0	30	5.00001	30	21	24	30	22
	40.25	24	30	19	25	30	29	18	26	27	27	30	30	24	5.00001	22														3.99999	30	21	30	0	30	21	0	5.00001	30	0	30	30	30	30	3.99999
	40.75	16	30	15	23	30	29	6	24	25	29	30	30	30	0	29														0	30	9.99999	30	0	30	29	0	21	30	5.00001	30	30	27	30	12
	41.25	21	14	11	26	19	30	23	30	29	24	30	30	30	0	28														15	30	19	30	0	30	19	0	25	30	12	30	13	11	30	9.99999
	41.75	20	9.99999	19	28	29	28	28	28	24	0.99999	29	30	30	21	29														21	30	6	30	0	30	16	0	24	30	0	30	21	3.99999	30	3
	42.25	16	22	25	26	30	27	28	30	24	24	25	30	30	30	30														24	30	0	30	0	30	30	0	30	30	0	30	28	13	30	0
	42.75	6	21	30	24	30	27	30	30	20	17	30	30	30	30	30														29	30	6.99999	30	22	30	24	17	30	30	9.99999	30	23	5.00001	30	0
	43.25	9.99999	18	30	19	27	28	30	30	29	19	29	30	30	30	30														20	30	0	30	23	30	27	30	30	30	0	30	23	6.99999	30	0
	43.75	25	25	30	23	28	30	30	30	30	17	30	30	30	14	23														3.99999	30	3.99999	30	26	30	27	30	30	30	0	30	30	12	30	0
	44.25	24	24	30	6.99999	30	30	30	30	22	15	30	30	30	30	12														6	30	5.00001	30	30	30	24	30	30	30	0	30	30	30	30	0
	44.75	29	28	30	5.00001	30	30	30	30	19	6.99999	30	30	30	30	17														0	30	0.99999	30	30	30	30	30	30	30	0	30	30	30	30	17
	45.25	30	22	30	27	25	30	30	23	29	22	30	30	30	30	29														23	30	0	30	30	30	30	30	30	30	0	30	29	30	30	30
	45.75	30	29	30	30	30	30	30	30	29	29	30	30	30	30	30														9	30	20	30	30	30	30	30	30	30	0	30	30	13	30	30
	46.25	30	25	30	30	26	30	30	30	28	29	30	30	30	30	30														6	30	30	30	30	30	30	30	30	30	0	30	30	6.99999	30	30
	46.75	30	28	30	30	29	30	30	25	30	30	30	30	30	30	30														0	30	30	30	30	30	30	30	30	30	9.99999	30	30	15	30	30
	47.25	30	30	30	30	30	30	30	30	30	30	30	30	30	30	30														6.99999	30	30	30	30	30	19	30	30	30	30	30	30	30	30	30
	47.75	30	30	30	30	6.99999	30	30	21	30	30	30	30	30	30	30														12	30	30	30	30	30	9.99999	30	30	30	30	30	3	28	30	30
	f: Day sleep						h: Day sleep						i: Day sleep
	EEC>						repo>						repoTS>
	Normal food		4% H2O2				Normal food		4% H2O2				Normal food		4% H2O2
	w1118	upd3-i KK	w1118	upd3-i KK			w1118	dome-i KK	w1118	dome-i KK			w1118	dome-i KK	w1118	dome-i KK
	495	632	566	404			249	508	555	422			219	363	475	313
	237	495	396	307			293	465	557	440			410	629	431	250
	170	512	539	577			317	400	522	477			454	483	397	441
	405	655	598	383			480	469	517	316			382	597	530	451
	357	503	436	426			497	606	541	516			490	616	612	374
	325	496	533	294			348	428	550	514			446	690	493	487
	61	470	619	382			428	536	656	374			344	619	519	451
	410	497	545	323			370	502	546	244			290	522	546	274
	505	519	497	133			490	708	627	465			244	547	468	392
	290	553	435	417			427	478	424	596			560	602	409	446
	452	467	604	297			540	574	537	551			395	467	461	403
	188	448	369	195			544	562	455	507			296	505	533	597
	329	536	514	391			579	443	356	593			386	688	420	477
	171	503	582	246			373	693	561	439			364	605	480	394
	374	625	580	324			386	633	509	326			347	457	533	526
	470	529		504			480	481	520	185			279	598	543	437
	501	699					362	475	598	190			527	633	391	521
	316	527					239	419	559	419			525	481	516	387
	315	405					271	506	422	272			570	575	423	493
	212	483					420	564	544	126			220	547	613	440
	332	610					363	528	531				489	615	577	580
	279	654					497	582	536				459	622	469	532
	466	477					445	440					175	621	540	459
	394	534					347	618					276	540	481	450
	499	511					405	551					560	598	546	601
	354	546					528	688					453	674	515	499
	485	532					386						453	662	513	444
	511	554					267						377	668	563	398
	290	337					460						188	615	537	509
	292						296						349	578	443	520
							266						322	667	333	408
							522							641		407
	g: Sleep pattern
	Bin (hours)	repo>																																repo>dome-i KK
	0.25	7	13	10	7	12	0	0	5	11	0	15	7	8	9	27	6	19	5	9	27	6	16	9	16	0	25	9	5	19	0	10	0	18	23	21	20	20	9.99999	20	23	25	17	29	28	17	23	25	9.99999
	0.75	5	6	0	15	19	5	0	0	7	0	15	14	13	0	13	10	10	0	0	17	13	26	20	0	6	28	0	10	13	6	0	12	8.00001	17	8.00001	26	21	14	9.99999	16	5.00001	19	19	30	22	27	11	0
	1.25	0	0	0	15	8	3	0	6	16	13	7	17	15	6	14	6	6	0	6	27	18	10	5	0	13	19	0	11	18	6	0	5	0	17	0.99999	25	21	26	3.99999	9	0	15	29	27	22	0	17	0
	1.75	0	15	0	27	23	6	11	6	7	15	14	22	19	9	20	15	0	0	20	14	10	13	14	0	9	14	0	7	17	10	6	6	13	25	3	23	16	21	0	14	0	3.99999	26	23	13	0	0	3
	2.25	6	9	7	23	18	15	18	5	19	9	17	19	6	10	21	20	0	0	0	19	15	11	19	5	6	23	6	12	20	16	12	22	26	30	15	27	25	23	0	21	9	0	30	30	15	0	0	9
	2.75	5	14	0	15	18	13	12	6	23	21	18	19	14	12	21	15	13	5	8	5	19	19	27	9	19	15	7	12	23	10	9	15	29	19	5.00001	24	29	24	0	16	22	8.00001	30	22	14	0	0	24
	3.25	7	16	10	26	18	16	20	11	24	13	19	23	20	5	17	25	17	0	16	22	24	22	15	12	18	14	0	13	25	5	18	22	30	29	9.99999	30	30	23	11	21	13	9	30	30	26	0	5.00001	23
	3.75	17	9	7	24	22	20	19	20	22	22	13	28	20	8	15	25	25	14	13	0	20	27	19	10	15	7	16	22	18	17	22	21	28	25	28	25	30	29	15	20	24	3.99999	28	27	19	0	0	28
	4.25	12	14	26	30	24	24	22	11	19	18	30	22	21	19	12	19	21	5	9	6	22	22	25	14	22	24	13	11	27	20	8	24	18	30	16	24	25	23	9	23	29	6.99999	21	28	27	8.00001	5.00001	29
	4.75	18	9	26	20	26	22	22	11	26	20	14	28	25	12	21	27	20	17	11	27	24	22	26	18	3	17	21	16	18	18	9	30	22	30	30	29	30	24	23	30	25	0	30	25	22	0	13	30
	5.25	19	21	29	26	25	28	26	27	30	22	30	30	30	14	16	24	29	17	25	13	20	28	26	25	25	20	20	15	17	14	16	28	28	30	14	25	24	27	23	29	27	0	30	22	30	29	28	30
	5.75	18	11	29	26	30	26	30	28	30	26	26	30	30	16	27	22	24	10	22	20	17	30	17	25	30	24	24	30	23	21	15	24	29	30	23	29	30	26	29	26	27	18	14	26	30	30	23	30
	6.25	12	8	30	30	26	27	30	30	30	28	30	30	30	21	20	25	30	21	30	20	30	28	16	29	20	21	30	12	26	23	30	29	30	30	21	29	30	11	27	26	30	19	30	29	30	30	28	30
	6.75	14	23	29	30	25	18	30	17	30	29	24	29	30	24	14	29	27	24	14	25	25	30	27	24	30	30	30	16	25	14	14	30	24	30	29	27	17	20	21	30	30	26	28	30	30	30	28	30
	7.25	25	21	30	30	30	28	30	19	30	29	29	30	30	30	12	30	30	10	24	11	22	30	30	30	30	22	29	10	30	25	23	30	30	30	29	23	30	30	28	30	30	28	30	30	30	30	18	30
	7.75	26	13	30	29	30	24	22	30	30	30	30	29	30	30	14	30	25	12	21	30	16	30	30	30	30	30	30	16	24	25	10	30	30	30	26	28	30	30	30	30	30	23	30	30	27	30	24	30
	8.25	15	16	28	13	24	24	24	30	30	30	22	30	30	30	6	30	17	18	10	25	15	30	30	30	29	27	30	1	30	16	9	30	30	30	25	30	30	30	30	30	30	27	30	30	30	30	24	30
	8.75	9	10	21	21	26	9	28	30	30	30	27	30	30	29	23	30	12	13	6	30	16	30	30	30	24	29	30	5	26	8	9	30	30	30	30	28	30	30	30	30	30	27	30	30	27	30	28	30
	9.25	22	16	5	19	18	8	19	27	30	25	28	30	30	30	14	20	9	15	13	22	10	30	30	13	25	28	30	10	24	8	10	30	30	30	30	27	30	30	30	21	29	30	30	30	30	30	29	30
	9.75	6	15	0	7	30	4	24	24	25	22	30	26	30	30	14	21	17	11	5	20	9	19	14	19	10	23	30	8	15	8	5	24	30	30	30	30	30	30	30	29	29	23	30	30	30	30	26	30
	10.25	6	10	0	22	14	7	27	17	21	15	30	18	30	29	11	22	11	14	0	30	7	23	16	1	19	30	26	6	5	5	0	23	29	30	30	30	30	30	30	22	20	24	17	30	29	30	29	27
	10.75	0	5	0	20	13	4	14	10	0	10	30	12	30	0	12	20	0	15	0	10	0	1	0	7	19	12	5	9	7	7	16	24	30	30	30	30	30	30	30	23	25	24	21	30	26	30	19	22
	11.25	0	0	0	5	8	11	0	0	0	0	28	14	28	0	14	0	0	6	5	0	5	0	0	0	3	30	0	10	5	6	15	19	30	30	28	26	28	29	29	24	19	30	29	28	19	30	12	9.99999
	11.75	0	19	0	0	10	6	0	0	0	0	14	7	30	0	8	9	0	7	4	0	0	0	0	0	0	16	0	0	5	8	0	14	29	30	22	26	22	27	22	18	29	25	18	21	20	28	0	0
	12.25	16	2	0	15	10	0	0	5	11	0	0	6	6	0	10	11	3	0	5	0	7	12	1	0	0	9	11	3	0	0	0	0	26	22	15	21	9	20	20	20	17	16	11	18	15	21	11	13
	12.75	26	22	28	22	29	21	15	4	30	5	13	29	0	11	13	30	26	0	30	9	28	0	27	0	10	5	30	24	0	24	17	0	25	20	30	30	26	28	24	29	23	30	22	30	30	30	25	30
	13.25	29	24	30	20	30	29	30	30	21	27	30	17	5	26	27	21	27	15	30	16	29	7	24	26	25	30	29	21	23	29	21	0	26	19	28	23	30	22	30	29	27	30	30	30	30	28	30	30
	13.75	21	26	29	30	30	30	26	26	30	30	11	29	0	25	10	30	23	26	30	27	26	29	21	29	25	25	30	22	30	24	21	0	29	30	30	30	30	18	29	25	30	30	30	30	22	30	30	30
	14.25	29	23	26	21	30	28	25	26	30	28	30	22	5	26	2	27	29	16	30	23	25	30	28	24	28	30	24	30	29	25	27	21	25	24	28	30	30	23	28	26	27	18	29	29	26	26	28	30
	14.75	26	17	28	30	30	30	28	19	30	26	27	29	20	20	30	18	23	29	24	23	28	30	23	26	30	24	26	25	28	28	25	30	30	29	29	22	30	23	29	28	30	30	28	30	30	22	30	30
	15.25	25	25	29	30	30	30	30	27	22	27	18	26	10	23	30	20	23	26	25	16	29	26	29	28	26	30	30	14	18	27	18	30	29	24	30	27	30	29	29	27	30	28	28	30	29	23	29	30
	15.75	30	27	29	23	29	23	26	20	30	26	26	29	5	30	18	15	12	18	25	17	30	25	19	11	22	25	29	14	26	25	25	30	30	30	29	26	30	23	29	30	30	30	30	13	30	26	30	30
	16.25	30	26	29	29	30	29	28	28	28	21	14	27	16	27	30	30	20	30	25	30	27	27	30	20	22	27	28	30	20	22	25	30	28	30	30	24	29	24	30	30	30	28	30	30	30	27	29	30
	16.75	30	27	28	30	24	30	30	17	15	19	29	22	27	23	20	30	22	20	30	22	29	26	21	25	17	30	30	23	22	27	30	30	30	30	30	30	29	28	30	30	30	30	28	30	30	17	30	30
	17.25	30	30	28	30	30	29	28	27	25	23	16	29	28	29	27	25	20	29	24	30	25	29	30	26	30	30	22	25	17	28	21	26	30	30	29	30	28	26	29	30	30	28	22	30	26	24	30	30
	17.75	30	30	28	30	30	28	29	3	28	10	18	28	30	24	17	23	29	29	24	22	12	26	21	24	23	25	21	30	28	24	21	22	30	30	30	30	29	30	28	27	18	30	30	30	29	27	30	30
	18.25	30	15	29	30	24	28	30	30	21	16	30	29	21	30	30	26	17	26	28	30	30	27	19	22	30	30	22	28	23	25	23	20	30	29	30	30	30	24	30	30	28	30	30	22	30	27	30	30
	18.75	30	25	27	30	30	30	27	30	23	23	30	30	19	26	15	27	23	20	30	29	27	27	26	30	26	23	28	13	21	22	29	22	27	27	30	20	30	28	29	30	29	29	29	24	29	27	30	25
	19.25	30	28	30	30	30	19	25	30	29	30	30	30	16	27	16	19	25	22	30	30	30	30	30	29	30	28	30	21	22	19	30	28	28	28	30	30	30	30	30	30	30	28	29	30	26	25	30	26
	19.75	30	24	24	30	30	30	21	30	24	24	30	17	24	29	9	30	20	30	29	23	26	27	25	24	17	28	30	30	17	29	30	21	30	30	30	30	30	28	30	30	30	25	23	22	24	30	30	30
	20.25	30	30	28	30	17	30	21	30	25	28	30	23	30	30	15	14	13	24	29	30	21	26	30	30	30	30	28	19	22	30	30	26	29	29	30	27	29	26	27	28	30	29	27	28	30	30	30	30
	20.75	30	30	29	30	29	22	30	25	25	20	30	27	12	17	30	20	11	30	29	30	28	30	26	16	26	29	29	22	22	30	21	30	30	29	30	27	30	30	30	30	30	26	28	28	30	30	29	15
	21.25	30	26	29	30	28	1	16	20	23	6	30	28	12	18	30	23	22	29	17	30	28	24	22	28	20	30	30	14	29	21	19	19	30	29	30	30	30	30	29	29	30	25	26	29	30	30	30	27
	21.75	15	25	21	30	25	27	29	30	24	22	19	14	0	12	30	16	15	30	15	26	21	30	30	21	23	27	23	25	22	30	6	6	30	24	30	22	30	30	28	29	30	29	30	17	30	30	30	30
	22.25	25	25	9	24	30	28	23	30	27	10	30	30	13	18	30	26	15	21	21	30	29	25	9	24	22	25	29	23	25	16	6	27	30	27	30	30	27	30	28	21	30	30	30	27	30	30	30	30
	22.75	20	30	0	24	30	30	9	30	22	17	12	23	13	21	30	30	26	25	16	23	21	29	22	25	30	26	17	28	25	24	21	19	30	30	30	30	28	30	30	28	30	28	30	22	30	24	30	20
	23.25	19	14	8	22	30	29	14	2	23	15	25	30	15	14	30	30	16	26	18	28	27	27	13	23	30	30	30	23	30	24	11	29	29	27	30	30	30	25	28	29	30	30	30	27	30	21	30	30
	23.75	5	25	0	11	29	24	11	0	0	3	18	15	15	0	2	16	12	22	11	29	7	0	7	2	4	23	8	19	11	0	16	0	29	24	30	30	16	24	28	5.00001	29	17	30	13	23	27	29	30
	24.25	15	21	28	16	14	23	26	21	30	21	14	17	16	21	25	19	24	26	25	19	16	19											23	21	28	30	29	23	30	24	29	29	19	6.99999	29	17	19	30
	24.75	12	23	19	24	24	29	30	27	26	20	16	21	3.99999	23	29	28	16	27	11	30	24	29											23	25	27	20	28	30	9	23	5.00001	29	30	9.99999	23	22	6.99999	17
	25.25	26	25	18	28	18	26	28	25	30	28	24	22	15	29	25	22	24	6	16	30	24	22											18	22	28	25	27	24	11	13	26	30	22	21	28	30	5.00001	8.00001
	25.75	23	26	22	25	25	22	30	26	30	27	17	14	21	30	27	21	24	28	19	27	19	25											22	28	27	19	29	29	11	5.00001	11	30	23	17	19	17	17	6
	26.25	28	25	9.99999	16	20	27	26	20	26	11	20	27	15	25	30	26	26	21	5.00001	29	20	22											17	26	19	16	26	9.99999	21	9	27	21	20	17	25	21	22	16
	26.75	15	26	21	30	26	26	29	23	19	18	26	22	13	26	24	21	30	17	9.99999	27	29	22											9.99999	16	28	5.00001	26	21	20	6.99999	9.99999	26	25	17	26	26	12	28
	27.25	23	23	30	24	22	27	24	23	26	18	30	19	11	28	27	25	30	23	12	28	24	12											27	26	30	11	19	29	28	5.00001	27	20	25	21	19	21	19	13
	27.75	21	20	28	26	28	26	26	12	24	23	26	22	0	19	29	23	22	27	16	27	15	19											14	22	23	6	23	25	30	6	28	25	19	9.99999	30	12	30	0
	28.25	23	18	26	26	27	28	30	19	29	26	24	29	12	27	30	24	23	19	9	26	24	9.99999											26	25	20	11	26	9.99999	30	19	15	9.99999	21	29	20	21	3	0
	28.75	30	24	22	30	27	26	27	27	23	19	20	19	23	27	24	16	23	26	26	14	20	27											16	14	28	22	27	26	9.99999	9.99999	30	30	19	28	30	19	0	11
	29.25	17	25	28	16	25	20	29	28	29	17	20	19	19	24	23	15	25	26	25	17	21	23											26	25	22	8.00001	21	22	9	6.99999	20	25	27	21	26	19	0	2.00001
	29.75	25	22	24	28	20	30	30	22	30	14	21	24	28	20	24	30	20	18	12	27	18	30											20	17	22	17	27	22	16	3	14	22	28	25	29	24	15	5.00001
	30.25	30	14	29	29	27	30	30	26	22	24	27	24	25	23	26	29	24	28	28	25	9.99999	29											14	8.00001	16	8.00001	26	17	19	9.99999	30	20	26	29	29	19	9	9
	30.75	30	21	27	25	30	28	28	21	17	20	30	18	15	17	28	23	29	25	28	24	24	6.99999											24	13	20	5.00001	18	24	17	0	30	21	30	26	24	24	0.99999	5.00001
	31.25	19	27	30	30	27	27	30	30	30	22	29	27	25	17	30	29	28	17	26	29	27	29											17	16	21	9.99999	18	28	23	13	28	29	29	23	29	13	29	0
	31.75	30	30	8.00001	30	26	30	27	27	25	16	30	16	13	16	14	29	25	30	16	25	30	30											6.99999	9	9.99999	11	29	15	14	19	24	30	29	22	24	17	14	0
	32.25	21	25	22	26	28	29	30	23	29	22	30	29	28	20	9	25	29	22	23	27	27	25											26	24	12	9.99999	18	17	6.99999	13	30	30	27	26	24	16	14	0
	32.75	30	30	26	30	21	25	30	30	30	16	30	27	8.00001	16	13	25	25	29	28	29	26	29											8.00001	11	8.00001	20	28	9	24	6.99999	16	20	26	21	22	24	19	0
	33.25	30	18	26	19	28	19	26	23	30	21	25	11	22	22	14	17	23	26	20	29	30	30											27	29	0	11	20	20	9	9.99999	23	26	20	22	22	21	20	0
	33.75	30	30	23	17	26	19	28	25	22	9	29	12	8.00001	21	15	18	27	29	11	28	23	30											9	12	6.99999	13	12	21	5.00001	16	24	25	25	28	27	18	27	6
	34.25	30	28	22	11	21	9.99999	23	9	30	8.00001	17	23	15	26	9.99999	14	25	28	16	11	28	13											17	23	9.99999	9	24	25	6	0	18	29	15	27	18	5.00001	8.00001	18
	34.75	20	16	17	6	19	11	25	25	17	0	20	0.99999	5.00001	30	13	12	23	24	16	16	15	22											13	14	20	13	3.99999	22	9.99999	5.00001	0	29	18	22	28	6	3	11
	35.25	5.00001	20	9.99999	0	5.00001	12	21	24	30	5.00001	5.00001	12	9.99999	30	0.99999	20	29	28	14	0	21	9.99999											9.99999	14	30	16	5.00001	23	9	15	0	23	19	24	22	22	8.00001	0
	35.75	22	20	6	5.00001	6.99999	0	23	9.99999	23	19	6.99999	0	5.00001	24	19	9	24	9	9.99999	0	16	22											8.00001	0	21	0	6	22	6	5.00001	0	17	9	14	20	5.00001	25	0
	36.25	9	9	13	8.00001	8.00001	12	17	11	0	25	17	5.00001	9	3.99999	20	25	0	9	15	0	25	16											3.99999	13	11	3.99999	0	9	8.00001	0	8.00001	14	0	14	9	15	0	2.00001
	36.75	15	11	25	25	22	30	30	29	19	30	30	26	13	30	30	30	30	23	30	8.00001	23	26											15	30	20	24	19	22	16	11	21	18	6	22	30	27	0	19
	37.25	16	20	30	30	22	23	22	30	25	23	28	20	22	30	21	23	16	25	30	30	20	28											24	30	16	25	26	25	6.99999	16	24	30	18	3	26	18	0	15
	37.75	15	26	30	27	30	30	30	30	30	30	30	30	19	15	25	30	5.00001	17	25	30	22	25											11	27	15	30	19	17	14	30	24	27	6	19	19	25	0	11
	38.25	21	25	30	22	26	22	30	30	29	25	30	30	30	17	20	30	29	26	30	30	0	29											9.99999	19	9.99999	30	28	17	0	26	21	16	14	19	30	23	5.00001	18
	38.75	21	18	25	27	17	30	30	22	30	20	30	15	11	30	30	30	30	26	30	30	18	30											23	30	13	30	2.00001	17	13	30	20	27	0	24	16	9	6	12
	39.25	15	26	25	26	24	30	25	27	18	29	30	30	3	20	30	24	20	27	20	30	29	28											17	30	13	30	29	23	12	30	26	30	12	17	20	13	6.99999	14
	39.75	23	21	24	30	30	27	30	21	25	28	30	24	12	19	22	30	9	22	30	30	30	30											5.00001	30	8.00001	30	15	14	8.00001	30	24	29	5.00001	26	29	26	0	0
	40.25	27	30	28	30	25	28	27	30	18	30	30	27	9	27	20	21	30	26	24	30	25	30											13	30	3	30	8.00001	11	5.00001	30	21	12	12	28	20	11	0	0
	40.75	25	17	19	26	23	30	30	15	30	22	23	21	0	22	25	30	30	27	27	30	22	20											9	23	11	30	6.99999	29	12	30	9.99999	25	6.99999	28	18	18	0	0
	41.25	29	28	30	27	28	30	9	27	30	23	30	21	0	17	19	30	30	25	27	30	19	30											24	21	0	30	8.00001	19	3.99999	26	22	30	0	23	30	0	0	0
	41.75	28	21	30	28	16	26	30	24	26	26	24	25	0	25	27	20	30	26	30	30	6.99999	25											12	30	0	30	5.00001	22	6	0	15	24	24	28	30	0	0	0
	42.25	28	29	28	30	18	23	27	27	25	27	24	24	0	23	30	30	30	29	22	30	22	30											9.99999	21	5.00001	30	11	0	0	15	20	15	9.99999	21	12	13	14	0
	42.75	28	24	28	24	24	29	18	16	18	30	24	30	5.00001	8.00001	30	30	19	23	28	30	23	22											15	24	6	30	6.99999	19	22	15	5.00001	9	6	26	28	20	6	0
	43.25	17	24	23	30	27	21	20	9.99999	30	30	30	26	0	22	30	30	30	11	30	30	20	30											15	28	0	30	0	17	8.00001	15	13	18	0	2.00001	16	11	5.00001	0
	43.75	30	30	30	23	23	30	30	22	30	26	30	22	0.99999	18	30	22	30	30	26	30	18	28											20	27	6	30	0	19	15	9	8.00001	30	0	24	19	23	0	0
	44.25	28	25	26	30	21	30	30	20	30	30	28	26	13	21	30	25	11	30	30	30	12	26											14	27	0	30	0	16	3.99999	20	21	13	0	0.99999	2.00001	19	0	0
	44.75	30	22	27	21	30	23	26	29	30	30	22	20	30	27	30	30	29	30	13	30	6	29											18	23	0	30	0	12	19	0	30	18	0	6	0	24	0	0
	45.25	25	30	20	30	24	30	0	17	29	30	26	24	30	17	30	30	19	30	30	30	6	28											23	30	0	30	0	30	5.00001	0	30	14	0	28	0	25	0	6
	45.75	30	24	30	28	22	27	0	21	30	30	30	30	30	30	30	30	24	28	22	30	0	24											0	21	0	30	0	21	6	0	30	6.99999	0	0.99999	0	18	0	11
	46.25	24	30	29	28	26	30	5.00001	24	30	27	30	30	30	30	30	30	30	17	29	30	6	26											11	26	0	30	0	15	0	6.99999	30	9	0	15	8.00001	0	0	27
	46.75	30	30	28	30	26	30	14	27	30	30	27	23	30	30	30	25	30	30	28	30	8.00001	30											15	30	0	30	0	18	0	28	30	26	22	6.99999	3.99999	5.00001	5.00001	26
	47.25	27	19	29	26	28	28	22	23	30	30	29	29	30	30	30	29	29	22	30	30	14	25											17	23	0	30	0	9	0	27	16	3	30	28	0	3.99999	2.00001	30
	47.75	11	19	22	13	0	27	12	11	29	21	12	6	30	30	20	3.99999	30	5.00001	12	30	22	18											0	19	0	30	0	13	0	29	25	14	30	5.00001	0	8.00001	3.99999	30
																																		0	0	0	0	0	0	0	0	0	0	0	0	0	0	0	0
[truncated: 12 more columns]

## Sheet: Figure 5 - figure supplement 1
	Figure 5, supplement 1
	a: Day sleep								b: Day sleep								c: Day sleep								d: Sleep after the first 2 hours after sleep deprivation
	repo>	Day 1 - normal food		Day2,3 - on 1% H2O2					repo>	Day 1 - normal food		Day2,3 - on 1% H2O2					repo>	Day 1 - normal food		Day2,3 - on 1% H2O2
	Day1	Day2	Day3	Day1	Day2	Day3			Day1	Day2	Day3	Day1	Day2	Day3			Day1	Day2	Day3	Day1	Day2	Day3			repo>
	dome-i KK/+	dome-i KK/+	dome-i KK/+	dome-i KK	dome-i KK	dome-i KK			dome-i TRiP/+	dome-i TRiP/+	dome-i TRiP/+	dome-i TRiP	dome-i TRiP	dome-i TRiP			dome-i GD/+	dome-i GD/+	dome-i GD/+	dome-i GD	dome-i GD	dome-i GD			w1118	dome-i KK	dome-i TRiP	dome-i GD
	399	322	327	460	454	397			401	529	487	542	430	469			443	440	454	463	546	592			98	108	88	94
	261	466	426	615	495	416			358	467	456	556	538	594			336	468	390	388	538	433			93	73	117	87
	313	574	596	580	514	460			397	453	560	614	544	460			411	527	356	486	457	504			99	113	96	101
	297	381	474	568	546	354			467	427	435	547	547	524			339	366	325	425	511	503			97	107	93	98
	394	439	490	472	287	221			457	505	486	600	577	646			407	299	234	382	404	337			99	106	91	89
	475	351	350	608	370	319			378	443	504	566	535	550			323	579	458	393	483	448			94	106	99	86
	411	520	485	616	537	422			497	522	527	600	118	276			476	503	476	412	444	517			107	92	87	88
	339	437	332	643	381	174			417	484	474	656	549	638			315	328	415	414	440	492			114	76	98	97
	291	490	331	541	371	336			344	446	407	574	562	557			440	376	346	462	512	465			99	98	85	95
	416	401	317	568	358	173			274	375	439	551	539	535			423	485	368	422	410	401			95	85	96	98
	315	459	362	469	373	341			460	495	492	499	499	469			114	366	316	339	386	430			99	93	82	116
	277	437	355	557	345	270			399	472	493	674	645	598			510	548	476	376	417	439			100	109	100	100
	351	472	447	626	503	475			458	548	557	586	556	571			476	386	463	428	397	388			100	79	89	99
	182	470	447	398	581	331			509	575	566	614	618	596			341	358	223	542	324	290			108	117	97	101
	361	422	400	472	184	32			513	493	523	402	301	394			510	334	476	487	555	616			99	99	99	81
	367	487	504	554	406	399			488	514	536	571	527	522			383	542	606	378	528	442			84	91	88	99
	441	317	298	361	330	130			448	426	572	675	589	571			313	490	481	396	489	446			100	74	96	89
	335	388	206	676	424	367			343	510	457	619	603	590			566	439	443	386	398	497			99		97	97
	129	472	389	676	633	580			373	567	571	562	552	471			362	394	471	570	435	585			99		98	100
	263	546	463	393	492	404			427	497	416	552	531	527			284	428	520	624	614	605					100	84
	345	517	400	659	460	372			442	459	553	577	524	526			293	460	456	417	443	457					84	92
	455	618	527	601	541	439			354	553	510	641	473	605			413	483	446	487	423	423					93	96
	390	573	492	568	655	357			457	560	611	630	624	629			231	280	370	528	388	432						87
	286	368	483	627	383	515			429	556	575	585	607	526			376	368	291	376	418	438						81
	397	476	352	609	499	89			300	404	359	518	628	578			349	350	347	333	360	322
	480	442	438		443	322			355	531	462	578	597	565			458	527	503	543	496	435
	362	453	354		417	298			463	460	419	567	568	576			405	528	553	177	221	230
	361	481	474		641	309			348	334	429	578	427	612			491	480	445	595	619	549
	378	648	594		228	423			436	597	592	447	416	465			372	445	460	461	470	475
	301	402	186		393				509	605	641	553	507	505			427	544	526	489	390	383
	214	568	238		446				442	475	524	468	420	375			284	433	274	435	377	404
	d: Sleep pattern
	Bin (hours)	repo>																			repo>dome-i KK																		repo>dome-i GD
	0.25	0	27	16	0	6	6.99999	9	13	5.00001	0	8.00001	26	13	23	0	0	5.00001	0	0	0	30	0	13	0	19	25	14	0	6	0	0	22	0	0	0	13	3	0	0	6	0	0	0	0	0	0	0	0
	0.75	0	26	0	0	5.00001	0	0	0	0	6	9.99999	16	9.99999	18	0	14	0	0	0	0	2.00001	9.99999	26	0.99999	19	18	18	3	0	9.99999	0	5.00001	0	0	0	15	8.00001	0	0	0	0	2.00001	0	0	0	5.00001	0	0
	1.25	11	19	9.99999	0	3	0	5.00001	6	0	8.00001	25	28	9.99999	21	0	0	0	0	9.99999	0	15	16	9.99999	3.99999	20	14	29	11	21	12	19	24	11	0	8.00001	11	3	0	0	13	0	3	0	0	0	0	0	0
	1.75	6	23	22	0	2.00001	5.00001	6	9.99999	3.99999	18	13	25	0	20	0	3.99999	0	13	6	0	28	9	19	5.00001	6	24	12	9	25	6.99999	19	28	20	5.00001	0.99999	30	6	0	6	0	0	3	0	5.00001	5.00001	5.00001	0	6.99999
	2.25	11	16	2.00001	2.00001	15	5.00001	0.99999	2.00001	2.00001	12	12	28	11	14	0	2.00001	3.99999	22	8.00001	0	22	6	30	8.00001	14	30	22	6	15	21	24	14	26	15	19	0	13	0	11	2.00001	0	3.99999	9.99999	5.00001	8.00001	9	6.99999	14
	2.75	6.99999	14	9.99999	3	5.00001	12	9	13	5.00001	12	25	19	16	28	0	11	6	18	17	0	24	16	29	6	19	28	24	12	15	20	30	30	27	24	8.00001	21	15	6	12	9	0	6	5.00001	0	11	5.00001	9.99999	2.00001
	3.25	0	25	23	8.00001	15	2.00001	6	22	0	15	22	28	8.00001	16	6.99999	15	17	22	0.99999	12	30	18	29	5.00001	24	30	23	11	30	26	17	21	22	30	19	28	23	5.00001	15	0	0	6	0	0	0	0	6.99999	9.99999
	3.75	13	22	23	5.00001	0	16	9	17	0	19	27	28	15	26	9.99999	17	14	24	22	6	29	28	22	23	30	28	30	14	30	12	30	29	20	30	24	29	17	0	18	6	6	13	6.99999	12	6.99999	0	22	8.00001
	4.25	6	19	16	0.99999	19	8.00001	24	19	6.99999	17	26	28	6.99999	20	5.00001	11	8.00001	20	21	13	29	28	29	15	30	23	30	16	28	18	24	30	20	30	0.99999	30	19	0	28	17	17	14	11	5.00001	29	9.99999	14	15
	4.75	8.00001	29	28	19	9	8.00001	14	18	28	16	29	23	19	20	0	20	8.00001	30	18	19	24	28	30	29	26	25	30	20	30	30	30	30	30	30	26	28	30	5.00001	27	20	24	9	16	11	30	9.99999	30	17
	5.25	9.99999	30	30	15	17	13	19	27	28	24	29	28	15	25	12	25	14	24	16	26	29	29	25	30	27	30	30	14	30	30	30	30	30	30	25	30	30	23	30	30	30	24	23	0	25	13	17	9
	5.75	11	21	30	27	22	6.99999	20	20	25	22	30	30	21	23	17	16	15	30	25	29	30	29	30	30	30	30	30	19	30	30	30	29	30	30	30	26	30	30	30	30	30	30	30	11	29	28	25	23
	6.25	11	30	20	20	25	9.99999	25	25	18	25	30	28	24	24	18	20	23	28	18	30	30	30	30	30	30	30	30	30	30	30	30	30	30	30	30	30	16	30	30	30	30	30	29	9.99999	30	30	28	29
	6.75	17	24	26	22	27	0	30	29	27	9	30	29	16	24	25	25	28	30	13	30	30	30	30	30	30	30	30	27	30	30	30	30	30	30	30	30	27	30	30	30	30	27	30	9.99999	24	30	30	28
	7.25	20	29	29	30	21	11	27	18	9.99999	21	28	29	25	26	27	22	29	29	29	30	30	30	30	30	30	30	29	30	30	30	30	30	30	30	30	30	30	30	30	30	30	30	30	20	21	30	30	29
	7.75	27	28	30	30	21	6.99999	14	28	29	14	29	29	14	27	23	30	29	30	26	30	30	30	30	30	29	26	30	30	30	30	30	30	30	30	30	30	30	29	30	30	30	30	30	12	28	30	30	30
	8.25	18	25	28	28	29	9.99999	30	27	23	30	30	29	12	21	29	20	30	30	28	30	30	30	30	30	29	30	30	27	30	30	30	29	30	30	30	30	30	20	30	30	30	30	30	29	21	30	30	28
	8.75	19	30	30	29	25	0	16	15	23	25	29	29	17	28	21	21	27	27	29	30	30	30	30	30	29	30	30	30	30	30	30	30	30	30	30	30	30	29	30	30	29	30	30	25	30	30	30	26
	9.25	6	27	22	30	22	5.00001	30	26	19	24	28	29	23	26	30	26	30	30	29	30	30	30	30	30	19	18	27	30	30	30	30	30	27	30	30	30	30	27	30	30	30	30	29	29	25	30	30	29
	9.75	11	20	28	29	26	0	30	28	30	29	30	28	20	23	23	30	30	30	28	30	30	30	30	30	29	30	30	30	30	30	30	30	30	30	29	29	30	26	29	28	30	30	30	29	28	30	30	27
	10.25	24	20	29	25	22	9.99999	24	28	27	8.00001	30	24	30	19	28	28	30	25	29	30	28	25	29	30	29	30	24	30	29	29	29	27	23	30	29	30	30	29	30	15	6	30	30	29	19	30	30	18
	10.75	30	26	22	30	14	2.00001	11	24	27	14	29	29	22	19	26	26	22	17	30	29	30	22	29	30	25	24	22	30	13	30	30	21	24	30	3	25	30	29	9.99999	0	0	30	30	17	14	30	30	28
	11.25	23	26	19	28	24	0	6.99999	15	28	5.00001	29	21	22	27	24	12	24	0	21	30	24	24	14	30	26	25	13	30	13	30	12	6.99999	5.00001	25	0	18	30	28	0	0	0	26	30	13	0	30	30	30
	11.75	18	26	8.00001	19	8.00001	0	0	0	0	0	19	15	6.99999	12	21	5.00001	5.00001	0.99999	19	20	13	5.00001	17	22	18	11	14	21	5.00001	20	0	13	6	2.00001	21	15	19	17	0	0	0	20	29	0	0	22	23	20
	12.25	20	2.00001	8.00001	19	8.00001	16	18	14	15	8.00001	14	11	13	0	12	6	13	3.99999	3	27	15	6.99999	13	30	23	2.00001	11	19	24	14	20	19	30	19	3	13	28	11	18	28	0	9	0	5.00001	29	0	11	22
	12.75	26	29	24	3	19	28	18	21	28	30	27	21	30	14	22	9	15	30	30	30	21	30	28	28	28	23	13	25	28	19	30	22	28	21	29	0	29	30	30	30	13	29	19	20	30	9	30	30
	13.25	30	29	29	16	24	23	22	23	30	6	28	21	30	11	30	24	13	18	30	30	15	29	25	30	28	23	18	28	30	9.99999	28	24	28	30	28	0.99999	26	27	21	30	29	27	20	24	30	9	28	29
	13.75	28	28	26	20	19	20	21	27	29	29	27	23	24	22	22	9.99999	29	21	30	27	19	30	23	25	27	25	16	29	28	23	28	30	30	27	30	20	30	27	29	30	25	30	24	29	27	17	30	29
	14.25	25	28	29	22	25	26	25	30	29	30	30	29	2.00001	27	29	5.00001	26	12	30	29	27	28	25	30	30	25	19	29	30	28	30	29	29	30	22	20	26	30	30	30	29	21	26	30	30	24	30	29
	14.75	20	28	29	24	22	27	27	26	30	27	22	20	0	24	26	30	6	24	29	30	12	29	27	28	24	29	26	28	28	26	29	28	23	28	22	26	28	25	30	29	29	30	30	27	30	23	19	30
	15.25	24	14	29	21	29	24	25	30	29	30	25	29	0	27	28	23	18	30	21	24	27	29	28	30	30	29	27	30	29	27	29	26	30	28	30	20	28	30	26	30	29	29	26	28	30	22	17	30
	15.75	30	0	28	16	30	26	23	21	30	30	30	21	0	24	23	9.99999	30	17	15	30	28	30	22	30	25	25	28	28	30	17	30	16	28	17	15	29	30	28	30	30	26	9.99999	21	21	30	30	28	30
	16.25	24	25	30	28	29	30	30	30	29	29	26	24	19	26	19	29	21	29	8.00001	30	25	30	29	25	30	28	23	26	30	21	27	29	26	30	21	15	30	23	28	30	30	26	12	29	30	23	30	30
	16.75	30	30	29	27	22	20	28	20	30	23	30	22	30	29	26	29	30	25	30	28	26	30	30	30	25	20	19	27	29	28	29	27	30	30	30	24	30	30	24	30	30	27	29	14	30	22	28	30
	17.25	30	21	16	23	28	16	25	30	30	25	28	26	29	29	29	29	30	23	30	29	15	25	24	25	29	25	25	30	27	25	30	17	30	25	28	16	30	24	30	30	30	26	29	11	19	30	30	30
	17.75	23	20	28	30	27	22	29	27	27	30	21	30	12	26	30	25	19	30	21	26	21	30	27	30	29	29	12	30	27	29	30	22	30	30	25	25	30	30	21	30	30	28	23	26	28	23	30	30
	18.25	6	0	0.99999	0.99999	0.99999	0.99999	0	0.99999	0.99999	0.99999	0.99999	0.99999	0	0.99999	0.99999	0.99999	0	0.99999	0.99999	0.99999	0	0.99999	0.99999	0.99999	0.99999	0.99999	0	0.99999	0.99999	0.99999	0.99999	0	0.99999	0.99999	0	0	0.99999	0.99999	0.99999	0.99999	0.99999	0.99999	18	0	0.99999	0	0.99999	0.99999
	18.75	0	0	0	0	0	0	0	3.99999	0	0	0	0	0	0	0	0	5.00001	0	0	0	0	0	0	0	0	0	0	0	0	0	18	0	0	0	0	0	0	0	0	0.99999	0	0	8.00001	0	0	0	0	0
	19.25	0	0	0	0	0	0	0.99999	0	0	0	0	0	0	0	0	0	0	0	0	0	0	0	0	0	0	0	0	0	0	0	27	0	0	0	0	0	0	0	0	9.99999	0	0	16	0	0	0	0	0
	19.75	0	0	0	0	0	0	9	0	0	0	0	0	0	0	0	0	5.00001	0	0	0	0	8.00001	0	0	0	0	0	0	0	0	30	0	0	0	0	0	0	0	0	0.99999	0	0	11	0	0	0	0	0
	20.25	5.00001	0	0	0	5.00001	0	0	0	0	0	0	0	0	0	0	0	0	0	0	0	0	9	0	0	5.00001	0	0	0	0	0	30	0	0	0	0	0	0	0	0	0	11	0	0	0	0	0	0	0
	20.75	0	0	0	0	0	0	6.99999	0	0	0	0	0	0	0	0	5.00001	3.99999	0	0	30	0	22	0	0	0	0	0	0	0	0	30	0	9	0	0	0	0	0	0	0.99999	0.99999	0	15	0	0	0	0	0
	21.25	0	0	0	0	0	0	6.99999	0	0	0	0	0	0	0	0	0	0.99999	0	0	19	0	13	0	0	0	0	0	0	0	0	26	0	19	0	0	0	0	0	0	5.00001	0	6.99999	17	0	0	0	0	0
	21.75	0	0	0	0	0	0	18	0	0	0	0	0	0	0	0	0	0	0	0	0	0	30	0	0	0	0	0	0	0	0	30	0	30	0	0	0	0	0	0	9	8.00001	0	30	0	0	0	0	0
	22.25	6	9.99999	0	2.00001	0	5.00001	16	0	0	0	0	0	0	0	0	0	0	0	0	0	0	30	11	0	0	0	0	0	0	0	30	0	30	0	0	0	0	0	0	14	19	0	30	0	0	0	0	0
	22.75	11	0	0	3	6.99999	0	0	0	0	0	5.00001	0	0	5.00001	5.00001	0	3.99999	0	0	3.99999	0	30	0.99999	5.00001	0	0	0	0	15	0	30	0	29	0	0	0	0	5.00001	0	6	9	9	3	0	0	0	0	0
	23.25	16	0	0	0	0	5.00001	22	12	2.00001	0	0	0	0	13	14	0	8.00001	0	0	3.99999	0	30	11	0	15	0	0	0	3.99999	0	30	0	30	0	0	0	0	0	0	30	16	0	28	0	0	0	0	0
	23.75	0	6.99999	0	9	0	0	5.00001	12	3	0	0	0	0	30	3.99999	0	28	0	0	0	0	30	12	0	3	0	0	0	3.99999	0	30	0	30	0	0	0	0	0	0	30	20	0	30	0	0	0	0	0
	24.25	9.99999	6	9.99999	8.00001	9	5.00001	17	25	9	9.99999	9.99999	11	11	28	9.99999	0.99999	11	9.99999	9.99999	30	2.00001	27	20	26	16	9.99999	15	9.99999	9	9.99999	30	5.00001	29	9.99999	9.99999	6.99999	0	6.99999	9	6	15	26	9	9.99999	6	8.00001	6.99999	9
	24.75	30	30	29	30	30	30	30	30	30	30	30	30	30	29	30	23	30	30	30	30	28	28	30	25	30	30	22	30	23	25	27	28	30	30	28	20	0	27	26	26	28	25	19	23	30	24	30	29
	25.25	28	27	30	30	30	29	30	30	30	25	30	29	30	30	30	30	29	30	30	27	24	29	30	28	30	22	20	29	30	30	23	21	30	30	27	30	0	30	30	14	30	30	15	28	26	30	30	28
	25.75	30	30	30	29	30	30	30	29	30	30	29	30	29	21	29	30	30	29	29	21	19	29	27	27	30	30	19	29	23	28	29	25	28	29	26	17	0	30	22	18	28	17	26	28	24	26	30	29
	26.25	29	21	28	29	29	29	30	30	30	30	30	28	28	26	30	30	29	30	30	28	25	24	23	30	30	30	11	30	30	27	28	26	29	29	21	30	0	27	29	23	29	29	19	30	27	14	30	28
	26.75	28	30	28	28	30	28	29	30	30	30	30	30	9.99999	30	30	29	24	30	30	29	28	30	24	30	30	30	25	24	30	21	25	20	29	30	21	20	0	29	23	27	23	28	20	30	29	29	30	28
	27.25	28	27	16	30	30	23	30	30	30	30	28	29	0	28	30	30	30	19	30	26	19	27	26	30	30	30	13	30	28	18	28	19	27	30	24	27	0	28	22	8.00001	30	29	24	29	16	30	30	29
	27.75	30	25	29	28	30	30	20	30	30	30	30	30	6.99999	25	29	29	29	27	30	30	12	30	29	27	30	29	20	24	30	19	28	30	29	12	26	23	0	29	23	22	13	27	24	29	28	25	30	30
	28.25	18	27	19	29	30	30	30	30	30	30	29	30	23	25	30	29	29	30	30	30	18	29	29	30	29	29	23	30	28	27	28	23	29	28	24	20	0	25	27	23	18	29	18	30	30	30	30	27
	28.75	29	17	24	29	30	29	30	30	30	30	30	30	22	18	29	29	30	30	30	30	24	28	25	27	30	29	18	24	30	22	28	20	29	30	24	19	0	30	29	30	23	29	30	30	29	30	30	30
	29.25	30	24	27	21	30	30	30	30	30	30	17	22	27	30	30	28	29	30	30	28	17	29	24	30	30	29	20	30	29	24	27	21	30	24	22	23	0	25	27	25	29	29	24	30	29	30	30	28
	29.75	27	30	30	25	30	30	30	30	29	30	30	26	27	30	29	15	24	29	30	21	20	30	30	30	30	29	12	30	29	23	24	19	24	30	23	26	0	22	29	30	22	29	23	30	30	25	30	30
	30.25	17	30	27	15	30	26	21	30	30	30	30	17	30	19	30	29	30	29	30	30	13	30	20	26	30	28	21	30	30	21	23	29	25	29	25	11	0	21	26	30	30	29	17	30	30	30	30	30
	30.75	18	29	27	29	30	21	29	29	30	30	29	20	30	21	30	14	30	30	24	27	21	30	28	26	30	29	25	30	28	24	22	21	30	29	24	22	0	24	30	30	22	25	30	30	30	30	30	30
	31.25	27	26	26	30	30	30	30	30	29	30	27	25	30	25	29	30	25	30	8.00001	29	24	25	19	30	29	28	24	30	29	29	29	25	9	30	26	25	0	28	29	30	30	25	30	30	24	30	30	27
	31.75	29	30	26	30	19	30	29	30	9	30	21	8.00001	30	30	30	30	30	29	30	30	18	28	24	30	29	29	30	26	30	23	30	28	18	30	25	28	0	24	28	30	24	29	30	30	30	30	30	26
	32.25	28	30	26	30	27	30	28	24	30	16	26	12	29	30	30	30	30	30	30	30	11	29	27	26	30	30	25	28	30	26	28	21	27	30	22	30	0	30	30	30	30	27	30	30	28	30	30	30
	32.75	22	30	29	30	14	30	26	30	30	20	17	15	6.99999	29	30	29	30	30	30	30	15	30	18	30	30	28	24	28	30	24	28	16	30	30	30	24	0	30	30	30	30	28	30	30	30	30	30	22
	33.25	29	30	28	30	15	30	30	30	30	27	28	16	6	29	30	11	24	28	30	27	13	29	21	30	30	30	25	25	30	26	27	21	30	27	18	25	0	30	28	30	30	30	30	29	27	30	30	18
	33.75	30	28	25	29	25	23	30	30	25	19	27	29	0	29	18	26	30	29	28	30	9	26	26	30	28	28	27	21	27	28	24	25	30	22	20	9.99999	0	28	27	30	15	30	30	29	30	30	30	23
	34.25	18	28	26	30	17	27	30	29	30	20	21	17	0	12	29	30	28	28	19	30	24	28	23	28	30	28	19	25	30	28	29	21	30	26	12	24	0	28	18	23	6	30	23	28	30	27	16	27
	34.75	25	2.00001	26	29	16	23	30	27	26	22	21	11	26	0	25	28	19	13	18	28	18	21	9.99999	30	30	15	17	19	28	29	6	20	29	23	9	27	0	8.00001	11	6	0	30	18	25	20	23	17	25
	35.25	18	0	6	29	6.99999	19	27	28	28	23	23	22	25	0	15	0.99999	5.00001	22	14	30	11	12	13	30	30	30	19	21	13	23	22	15	29	29	8.00001	20	0	0	0	0	0	29	0	30	21	0	6	0
	35.75	6.99999	0	0	19	6.99999	18	29	6.99999	26	15	5.00001	0	21	11	0	5.00001	6	18	16	26	6.99999	0	11	27	30	24	26	2.00001	28	17	5.00001	20	30	28	0	22	0	0	0	0	0	21	0	25	24	0	5.00001	0
	36.25	13	3.99999	19	9.99999	26	21	23	16	26	18	16	9	24	5.00001	9.99999	15	16	16	18	24	14	11	15	30	29	21	13	19	24	20	18	25	24	25	9.99999	12	0	9.99999	20	6	13	5.00001	5.00001	26	21	8.00001	16	20
	36.75	30	25	28	23	21	30	28	28	30	29	30	25	22	22	15	6	28	22	30	30	25	29	20	21	29	25	17	28	30	6.99999	24	28	28	26	21	25	0	27	28	28	25	25	26	24	17	20	30	30
	37.25	30	27	30	30	30	29	29	30	29	30	27	24	29	20	29	22	29	25	30	29	24	30	30	30	27	23	14	29	28	24	30	20	30	29	22	23	0	23	30	29	25	30	26	30	23	30	28	26
	37.75	18	30	29	28	28	30	28	26	30	30	29	27	9	25	29	30	29	29	26	30	21	29	21	30	23	20	25	22	30	19	25	27	30	30	20	26	0	30	30	24	27	18	24	30	24	29	27	29
	38.25	14	26	30	29	30	29	23	30	30	30	29	28	26	26	29	24	30	22	30	29	24	29	27	19	26	20	23	30	28	25	30	25	30	29	29	25	0	29	30	30	11	22	30	26	24	30	27	30
	38.75	30	22	29	14	29	29	30	29	28	30	30	30	25	29	30	0	27	29	26	30	27	30	30	30	28	14	20	22	28	22	30	26	30	30	27	30	0	24	29	30	30	27	29	30	26	29	23	30
	39.25	28	16	30	24	30	20	27	29	30	29	25	30	26	26	29	26	30	29	30	30	27	29	26	30	24	11	23	30	30	18	20	19	30	30	14	26	0	30	29	30	29	24	18	30	20	29	28	26
	39.75	29	25	28	27	30	30	25	30	29	30	28	28	30	22	30	30	11	30	29	29	26	30	30	28	30	30	28	30	30	12	30	13	27	30	13	29	0	29	30	30	26	30	16	25	30	25	29	29
	40.25	30	25	30	29	29	30	30	26	30	29	30	30	30	24	26	25	0.99999	29	30	30	24	29	28	20	30	30	27	29	22	29	26	11	30	30	6	25	0	30	30	30	27	22	17	29	13	29	30	30
	40.75	30	30	30	30	30	29	30	30	30	23	22	30	30	30	29	30	30	30	30	28	24	27	30	30	30	26	30	29	17	18	29	29	30	26	29	30	0	30	28	24	29	23	30	30	29	28	30	30
	41.25	29	25	30	25	29	14	25	29	30	22	30	29	29	28	21	28	30	30	26	30	23	28	22	28	28	30	23	28	21	26	24	29	30	30	29	30	0	28	30	28	30	30	28	30	20	26	30	30
	41.75	17	26	18	24	30	30	30	30	30	30	29	30	29	28	30	28	24	30	29	30	24	29	30	30	30	30	25	29	28	26	28	23	30	25	30	30	0	27	29	30	24	24	30	30	17	30	30	30
	42.25	23	29	24	30	30	30	26	29	30	30	30	29	30	28	30	30	30	29	29	30	24	28	26	30	30	30	21	30	21	20	30	20	30	30	28	30	0	19	27	30	30	30	30	30	30	28	30	30
	42.75	29	26	30	29	30	14	30	30	29	30	30	25	30	29	26	30	30	29	29	29	26	30	30	20	30	30	29	28	28	29	24	28	30	28	29	30	0	29	30	30	30	30	26	29	21	30	29	26
	43.25	12	21	29	29	30	28	29	30	30	30	29	30	24	29	30	30	26	29	30	30	19	29	26	30	30	30	24	28	30	25	29	29	30	30	28	30	0	28	29	30	26	30	30	29	30	22	30	30
	43.75	11	30	30	30	28	30	25	30	29	29	29	30	9	28	30	27	25	23	26	30	30	30	30	27	29	29	20	26	30	29	29	25	30	30	23	30	0	23	30	30	30	30	24	30	24	17	30	30
	44.25	30	30	30	30	15	30	30	30	30	30	30	30	30	30	30	28	30	19	30	27	21	26	29	30	29	29	27	30	30	28	30	23	30	30	26	30	0	30	30	30	24	30	28	30	28	24	30	28
	44.75	29	25	30	24	29	26	24	30	30	13	30	30	30	29	30	28	24	30	30	30	16	30	22	30	30	30	29	30	30	30	24	18	30	26	30	30	0	14	26	28	24	28	30	30	30	30	30	30
	45.25	27	18	30	25	26	30	29	30	30	13	30	30	28	30	30	30	30	30	30	29	25	28	30	29	30	30	26	19	30	29	30	25	26	30	30	11	0	30	30	30	28	26	19	30	30	28	30	25
	45.75	30	17	30	18	26	27	30	30	25	24	28	30	30	25	30	0.99999	29	23	30	30	24	30	29	29	30	30	29	30	30	30	30	25	30	30	30	13	0	30	29	25	26	21	28	30	30	29	30	24
	46.25	30	25	28	18	30	28	30	30	30	30	29	29	30	30	30	2.00001	30	30	30	30	30	28	30	30	30	30	27	30	30	30	30	28	30	30	30	30	0	28	30	30	30	8.00001	19	30	30	14	30	30
	46.75	30	25	30	30	30	30	28	30	30	30	30	29	27	29	29	30	30	27	27	30	8.00001	30	30	30	30	30	22	30	30	30	30	30	30	30	30	13	0	30	30	23	26	30	27	30	21	30	30	30
	47.25	25	30	30	30	30	30	30	30	30	30	30	30	6	28	29	29	30	30	30	30	30	30	30	30	30	30	30	30	30	30	30	30	30	30	30	28	0	26	30	20	28	23	23	30	30	23	30	30
	47.75	12	27	30	30	30	8.00001	30	29	30	30	30	30	30	26	30	18	20	30	30	1	0.733333	1	1	1	1	1	1	0.966667	1	1	1	1	1	1	1	1		25	30	27	25	25	25	30	19	23	30	30
[truncated: 39 more columns]

[truncated: 3 more sheets: Figure 6, Figure 7, Figure 7 - figure supplement 1]
